# Supplementary material for: The main oxidative inactivation pathway of the plant hormone auxin
Source: PubMed Central journal article supplement (PMC8608799; doi:10.1038/s41467-021-27020-1), 2021-11-22
Supplement: 41467_2021_27020_MOESM1_ESM.pdf [file 41467_2021_27020_MOESM1_ESM.pdf]

## **Supplementary Information**

### **The main oxidative inactivation pathway of plant hormone auxin**

Ken-ichiro Hayashi<sup>1\*</sup>, Kazushi Arai<sup>1</sup>, Yuki Aoi<sup>2</sup>, Yuka Tanaka<sup>1</sup>, Hayao Hira<sup>3</sup>, Ruipan Guo<sup>4</sup>, Yun Hu<sup>4</sup>, Chennan Ge<sup>4</sup>, Yunde Zhao<sup>4</sup>, Hiroyuki Kasahara<sup>5,6</sup>, Kosuke Fukui<sup>1</sup>

Correspondence to: Ken-ichiro Hayashi (hayashi@dbc.ous.ac.jp)

#### **This PDF file includes:**

Supplementary Figs. 1 to 20  
Supplementary tables 1 and 2.  
Supplementary Methods  
Supplementary Reference 1 to 14

## Supplementary Figures 1-20

**Supplementary Fig. 1.** Schematic representation of the IAA inactivation pathways and the mutant lines used in this study

**Supplementary Fig. 2.** GH3 enzymes are involved in major IAA inactivation pathways.

**Supplementary Fig. 3.** Endogenous amounts of IAA and its metabolites in IAA-inactivating enzyme mutants, *YUC2* overexpressing line, and WT plants treated with a GH3 inhibitor KKI.

**Supplementary Fig. 4.** AtDAO1 catalyzes the oxidation of IAA-amino acid conjugates to yield corresponding oxIAA-amino acid conjugates.

**Supplementary Fig. 5.** Docking study of IAA, IAA-Asp, and IAA-Glu with AtDAO1.

**Supplementary Fig. 6.** OsDAO functions as an IAA-amino acid conjugate oxidase to produce oxIAA-amino acids.

**Supplementary Fig. 7.** IAA-Asp functions as a storage form of IAA.

**Supplementary Fig. 8.** IAA-amino acid diesters showed auxin activity in *Brachypodium distachyon* and rice (*Oryza sativa*).

**Supplementary Fig. 9.** AtDAO1 modulates auxin activity derived from IAA-Asp and IAA-Glu.

**Supplementary Fig. 10.** Endogenous levels of IAA-amino acid conjugates in wild-type and *dao1-1* and the effects of IAA-amino acid conjugates on *dao1* mutants.

**Supplementary Fig. 11.** Rice OsDAO complements the hyper-sensitivity of *dao1-1* to IAA-amino acid diesters and the *Atdao2-1* mutants showed the same sensitivity as WT to IAA-Asp-DM

**Supplementary Fig. 12.** Endogenous amounts of IAA and its metabolites in *dao1-1* and *GFP-AtDAO1*-overexpressing plants.

**Supplementary Fig. 13.** Endogenous amounts of IAA metabolites in rice (*Oryza sativa*) and *Brachypodium distachyon*.

**Supplementary Fig. 14.** ILR1/ILL enzymes are responsible for the conversion of IAA-Asp and IAA-Glu to IAA.

**Supplementary Fig. 15.** *ILR1*, *ILL2*, *IAR3*, and *ILL3* are required for the conversion of IAA-Asp and IAA-Glu to IAA.

**Supplementary Fig. 16.** Expression patterns of *ILR1*, *ILL2* and *IAR3*.

**Supplementary Fig. 17.** The responses of the *dao1* mutant to IAA-Asp and IAA-Glu esters depend on ILR1.

**Supplementary Fig. 18.** The *ilr1 iar3* loss-of-function mutation restored *dao1-1* phenotypes.

**Supplementary Fig. 19.** GST-ILR1 hydrolyzed both oxIAA-amino acid conjugates and IAA-amino acid conjugates.

**Supplementary Fig. 20.** Endogenous amounts of IAA-Asp and dioxIAA in *ilr1* mutant and the complementation line.

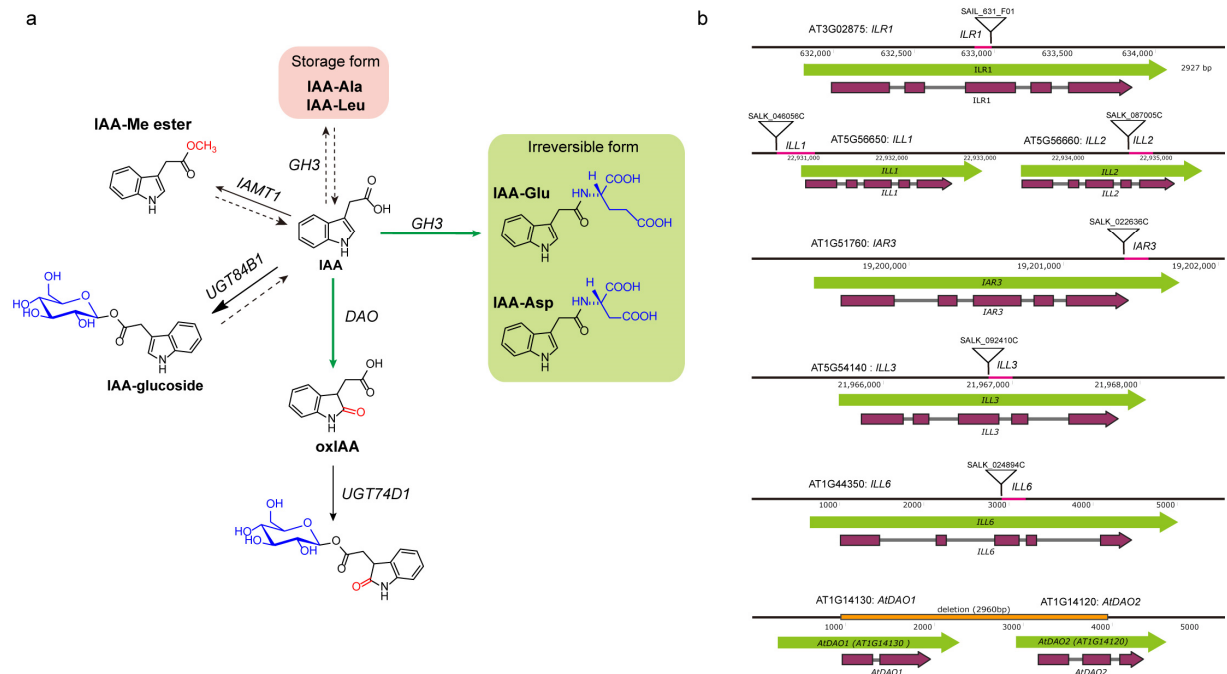

**Supplementary Fig. 1. Schematic representation of the IAA inactivation pathways and the mutant lines used in this study.**

(a) Chemical structures of IAA metabolites and enzymes in IAA catabolic pathways. (b) Schematic representation of homozygous T-DNA insertion lines and CRISPR-Cas9 *dao1 dao2* line. The magenta boxes indicate exons, the gray lines indicate introns, and the green boxes indicate a genomic sequence. The insertion sites are indicated by triangles. The red line indicates the genome sequence outside the T-DNA left border.

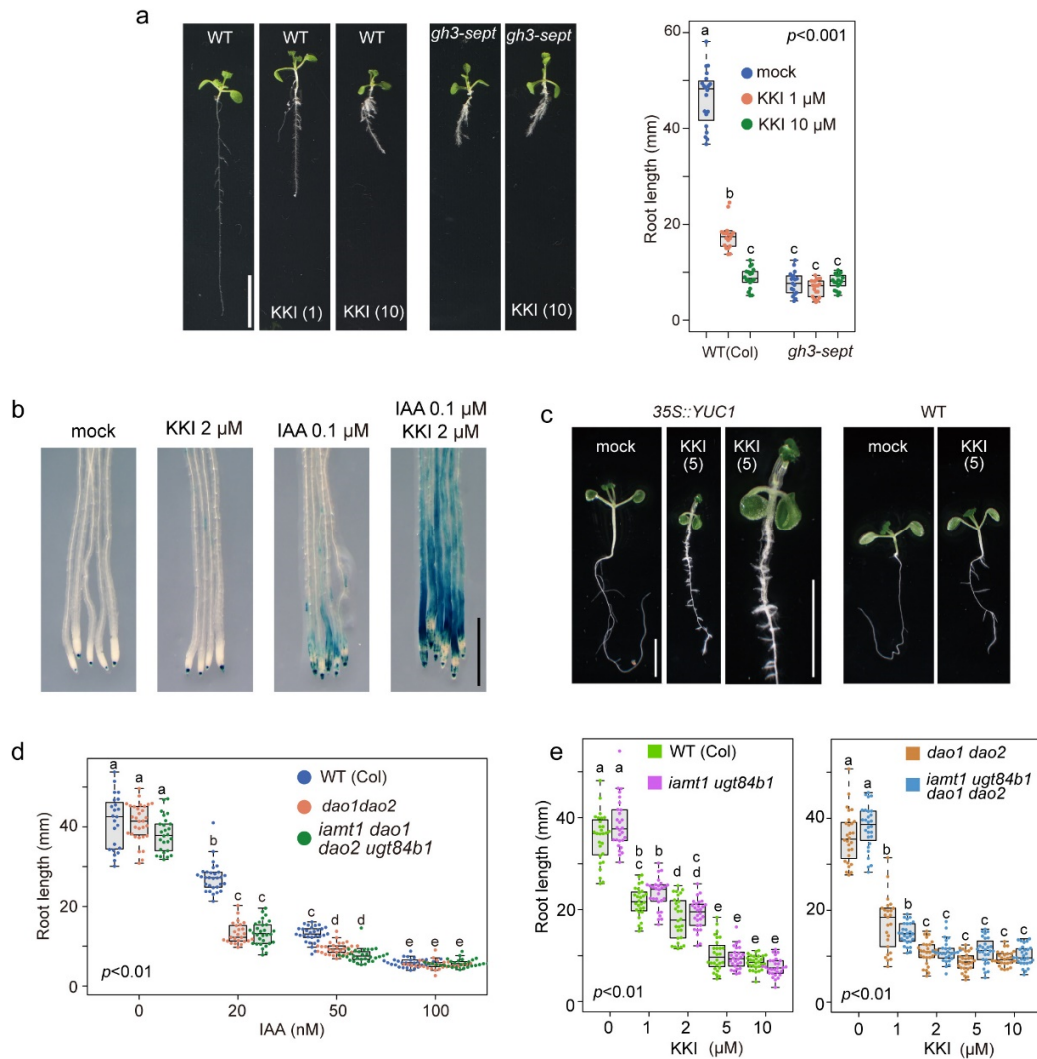

### Supplementary Fig. 2. GH3 enzymes are involved in major IAA inactivation pathways.

(a) Effects of kakeimide (KKI, a GH3 inhibitor) on the *gh3-1 2 3 4 5 6 17* (*gh3-sept*) mutant (heterozygote in *gh3-9*). Scale bar, 10 mm. The *gh3-sept* roots were insensitive to KKI. The different letters represent statistical significance at  $P < 0.001$  (Tukey's HSD test,  $n = 17-20$ ). (b) Effects of KKI on auxin-inducible *DR5::GUS* transgene expression. Six-day-old *DR5::GUS* seedlings were cultured for 6 h in liquid GM media with chemicals ( $\mu$ M). The auxin-induced GUS activity was visualized by X-Gluc. Scale bar, 1 mm. Cotreatment with IAA and KKI synergistically enhanced *DR5::GUS* expression. (c) Effects of KKI on the IAA-overproduction line *35S::YUC1*. The *35S::YUC1* is hypersensitive to KKI and displays extreme high-auxin phenotypes. Plants were grown on GM plates with KKI for 7 days. Scale bar, 5 mm. (d) The sensitivities of mutants in IAA inactivation enzymes to IAA. The primary root length was measured after 8 days of cultivation on vertical GM medium (6 g/L gellan gum) containing IAA. The mutation in *dao1 dao2* enhanced the sensitivity to IAA (20–50 nM) in the root. The different letters represent statistical significance at  $P < 0.001$  (Tukey's HSD test,  $n = 23-30$ ). (e) The *iamt1 ugt84b1* double mutation did not affect the sensitivity to KKI in the presence or absence of *dao1* and *dao2*. The primary root length was measured after 8 days of cultivation on vertical GM medium (6 g/L gellan gum) containing KKI. These results suggest that IAMT1 and UGT84B1 do not function as alternative pathways to GH3. The different letters represent statistical significance at  $P < 0.001$  (Tukey's HSD test,  $n=25-28$ ). (a,d, e) Box plots in all figures show the median as lines in the box, the 1st to 3rd quartiles as bounds of box, whiskers with end caps extending 1.5-fold interquartile range beyond the box, and the end caps represent the minimum and maximum.

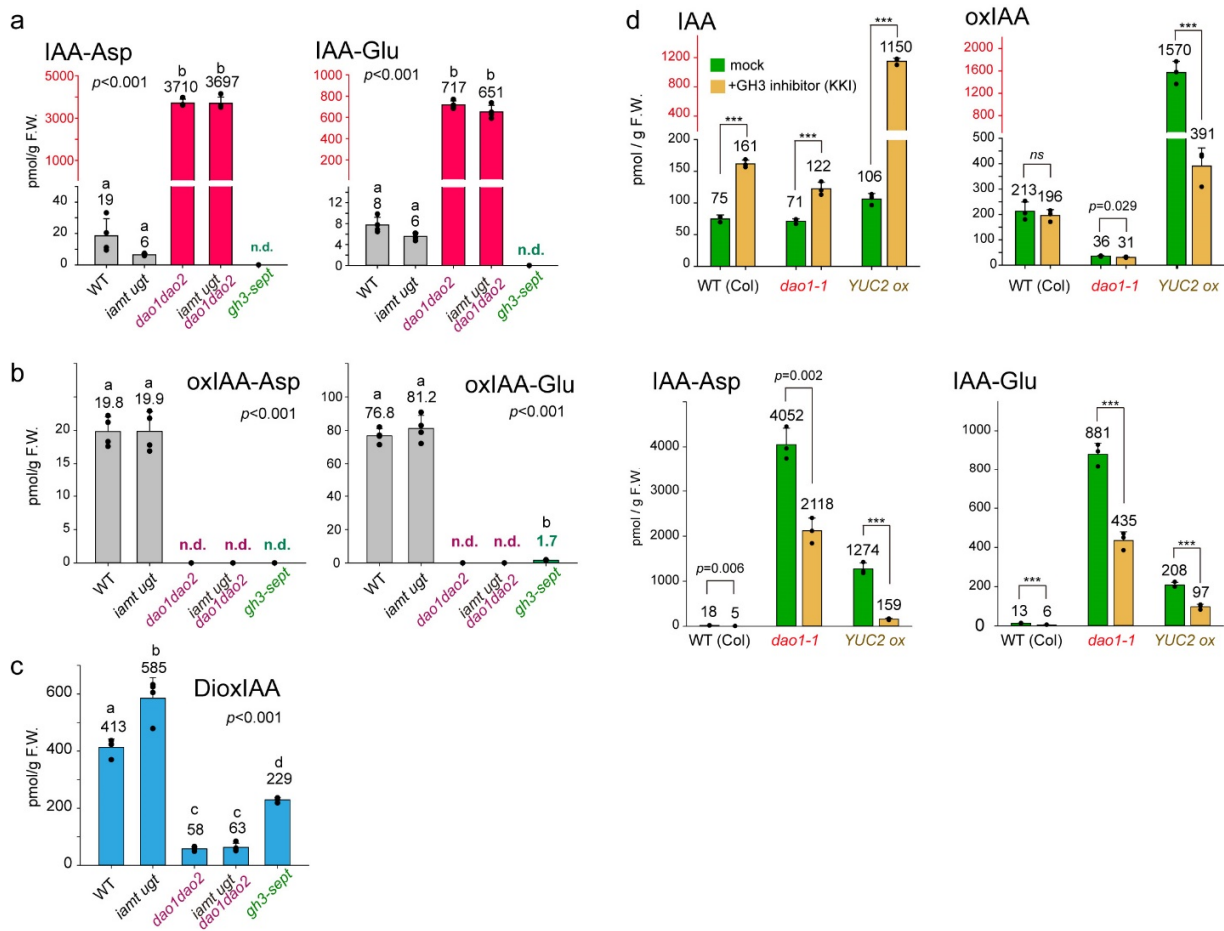

**Supplementary Fig. 3. Endogenous amounts of IAA and its metabolites in IAA-inactivating enzyme mutants, *YUC2* overexpressing line, and WT plants treated with a GH3 inhibitor KKI.**

(a–c) The levels of endogenous IAA-amino acid conjugates (a) and oxIAA-amino acid conjugates (b), and dioxIAA (c) in IAA-inactivating enzyme mutants (8-d-old) shown in Fig. 2c. (d) Eight-day-old WT, *dao1-1*, and *pMDC7::YUC2* seedlings were incubated in liquid GM media with or without 20  $\mu$ M KKI in the presence of 2  $\mu$ M estradiol (ER) for 36 h. After extensive washing of seedlings with fresh water, the metabolites were analyzed with LC-MS/MS. (a–c) The values shown are the means  $\pm$  SD (n = 4). The different letters represent statistical significance at  $P < 0.01$  (Tukey's HSD test). n.d, less than the detection limit. (d) The values shown are the means  $\pm$  SD (\*\*\*)  $P < 0.001$ , two-tailed Student's *t*-test, n = 3).

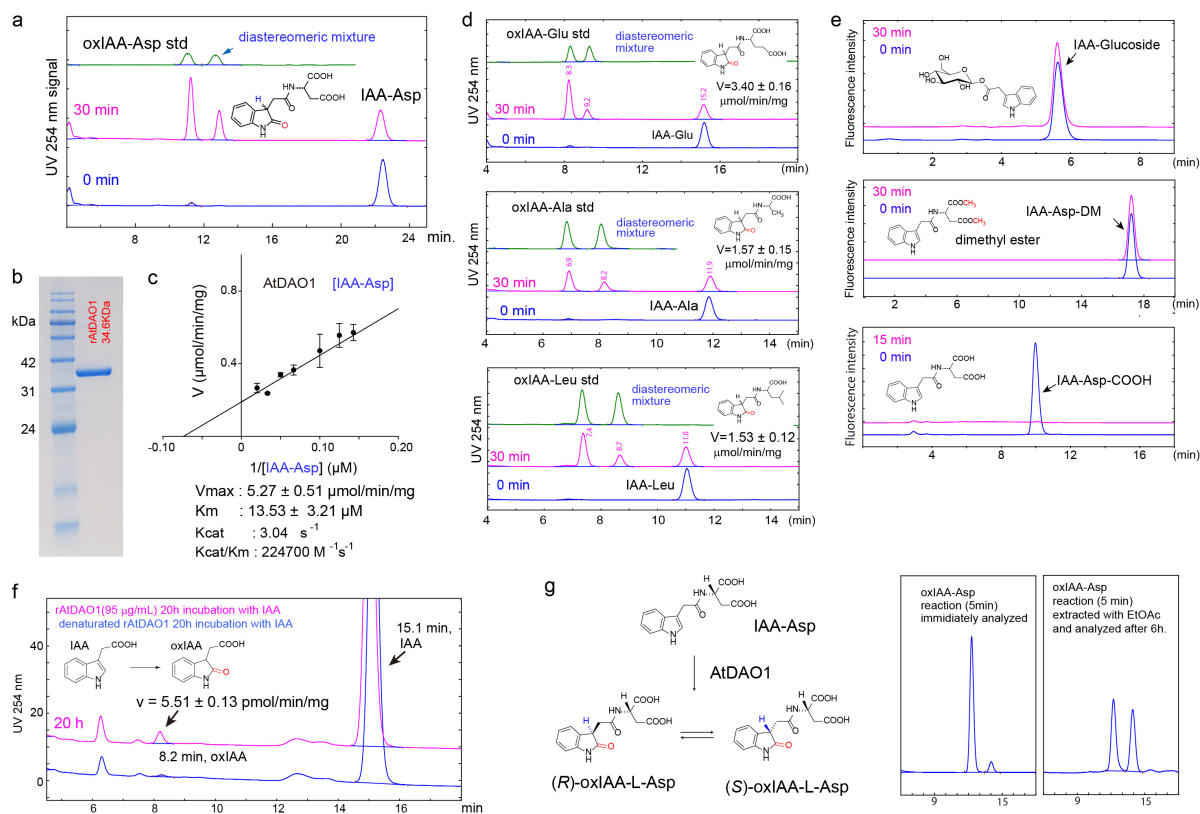

**Supplementary Fig. 4. AtDAO1 catalyzes the oxidation of IAA-amino acid conjugates to yield corresponding oxIAA-amino acid conjugates.**

(a) HPLC chromatogram of the reaction products of the AtDAO1 enzyme. IAA-Asp was used as a substrate. oxIAA-Asp was detected as a reaction product. (b) SDS-PAGE analysis of purified AtDAO1 protein (34.6 kDa) expressed in *E. coli* harboring the pCold-AtDAO1 vector. This experiment was repeated three times independently with similar results. (c) Lineweaver–Burk plot and kinetics parameters of AtDAO1 for IAA-Asp. ( $n=3$ ). Error bars, SE. (d) HPLC chromatogram of the reaction products of the AtDAO1 enzyme. IAA-Glu, IAA-Ala, and IAA-Leu were used as substrates. oxIAA-Glu, oxIAA-Ala, and oxIAA-Leu were detected as reaction products from IAA-Glu, IAA-Ala, and IAA-Leu, respectively. ( $n=3$ ) (e) HPLC chromatogram of the reaction mixtures of AtDAO1. IAA- $\beta$ -D-glucoside, IAA-Asp dimethyl ester (IAA-Asp-DM), and IAA-Asp were used as substrates. IAA-Asp was completely consumed after 15 min of reaction. A total of 98% IAA- $\beta$ -D-glucoside and 97% IAA-Asp-DM remained after the AtDAO1 reaction for 30 min. (f) AtDAO1 oxidizes IAA to produce oxIAA as a reaction product. The oxIAA production rate by AtDAO1 was  $5.51 \pm 0.13$  pmol/min/mg under our assay conditions. ( $n=4$ ) (g) oxIAA-amino acids were detected as a diastereomeric mixture from the reaction mixture. One of the diastereomers of oxIAA-Asp was readily epimerized during sample preparation.

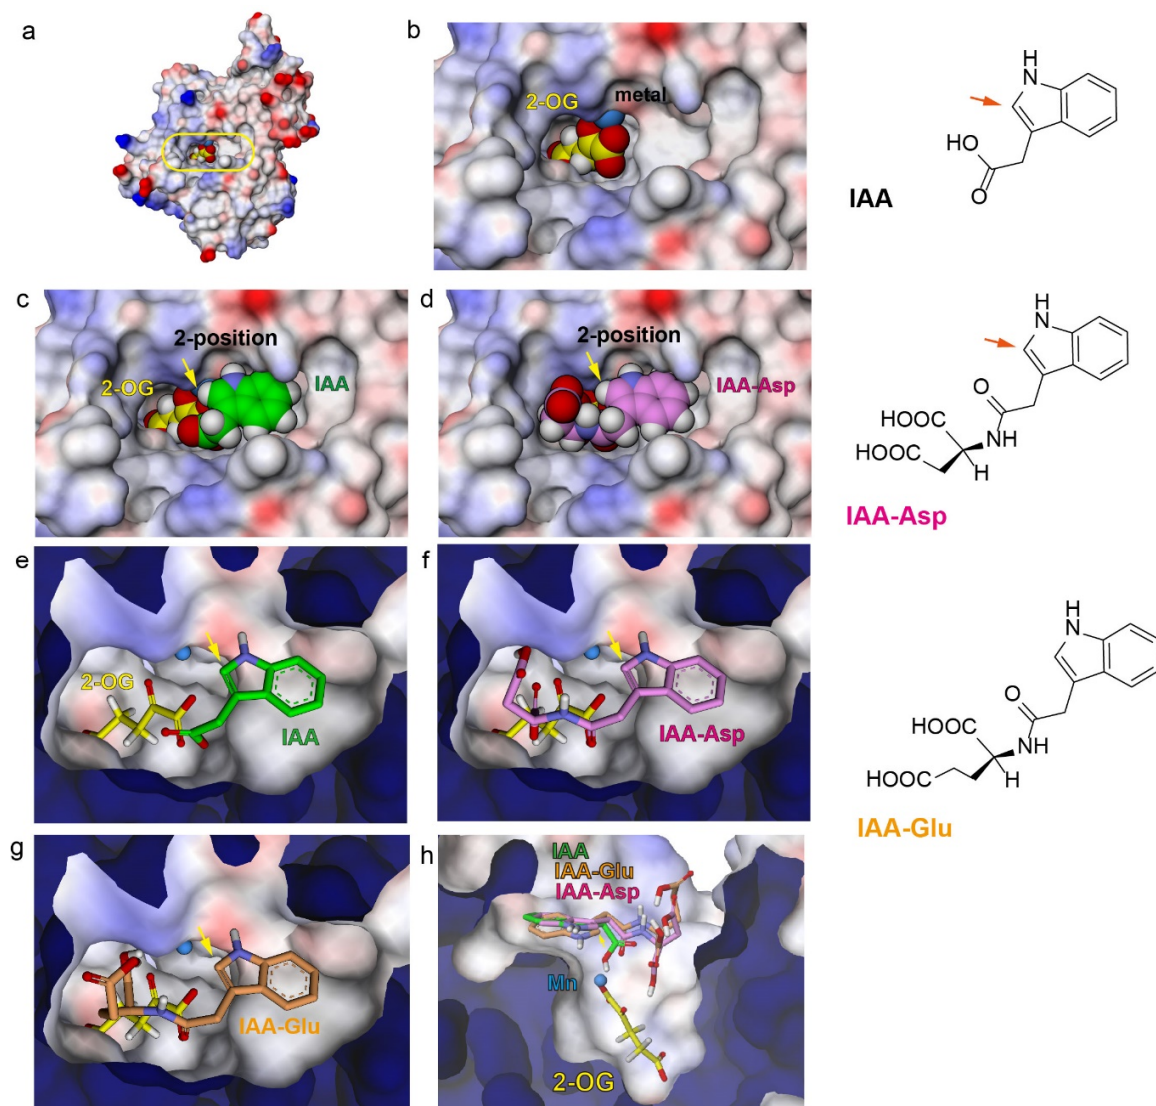

**Supplementary Fig. 5. Docking study of IAA, IAA-Asp, and IAA-Glu with AtDAO1.**

(a) AtDAO1 structure from the crystal coordinates (PDB ID: 6KWB). (b) The substrate-binding site of AtDAO1. AtDAO1 was co-crystallized with 2-oxoglutarate (2-OG: yellow color) and magnesium ion. (c-h) The predicted binding poses of IAA and IAA-amino acid conjugates in AtDAO1 were calculated by AutoDock Vina molecular docking software. The top scored poses are visualized as green molecules, IAA; magenta, IAA-Asp; cyan, IAA-Glu. The molecules are shown as space-filling models (c and d) or stick models (e-h). The IAA moiety was located at the same position among the IAA and IAA-amino acid conjugates. The 2-position of the IAA moiety was oriented to 2-OG and the magnesium ion (arrows). IAA could not fill the binding site. On the other hand, the amino acid moieties of IAA-Asp and IAA-Glu occupied the entire binding pocket of AtDAO1. Under this calculation condition, the affinity scores (Kd) of IAA, IAA-Asp, IAA-Glu, IAA-Leu, and IAA-Ala were estimated to be  $-6.1$ ,  $-7.7$ ,  $-7.1$ ,  $-7.0$ , and  $-7.5$ , respectively.

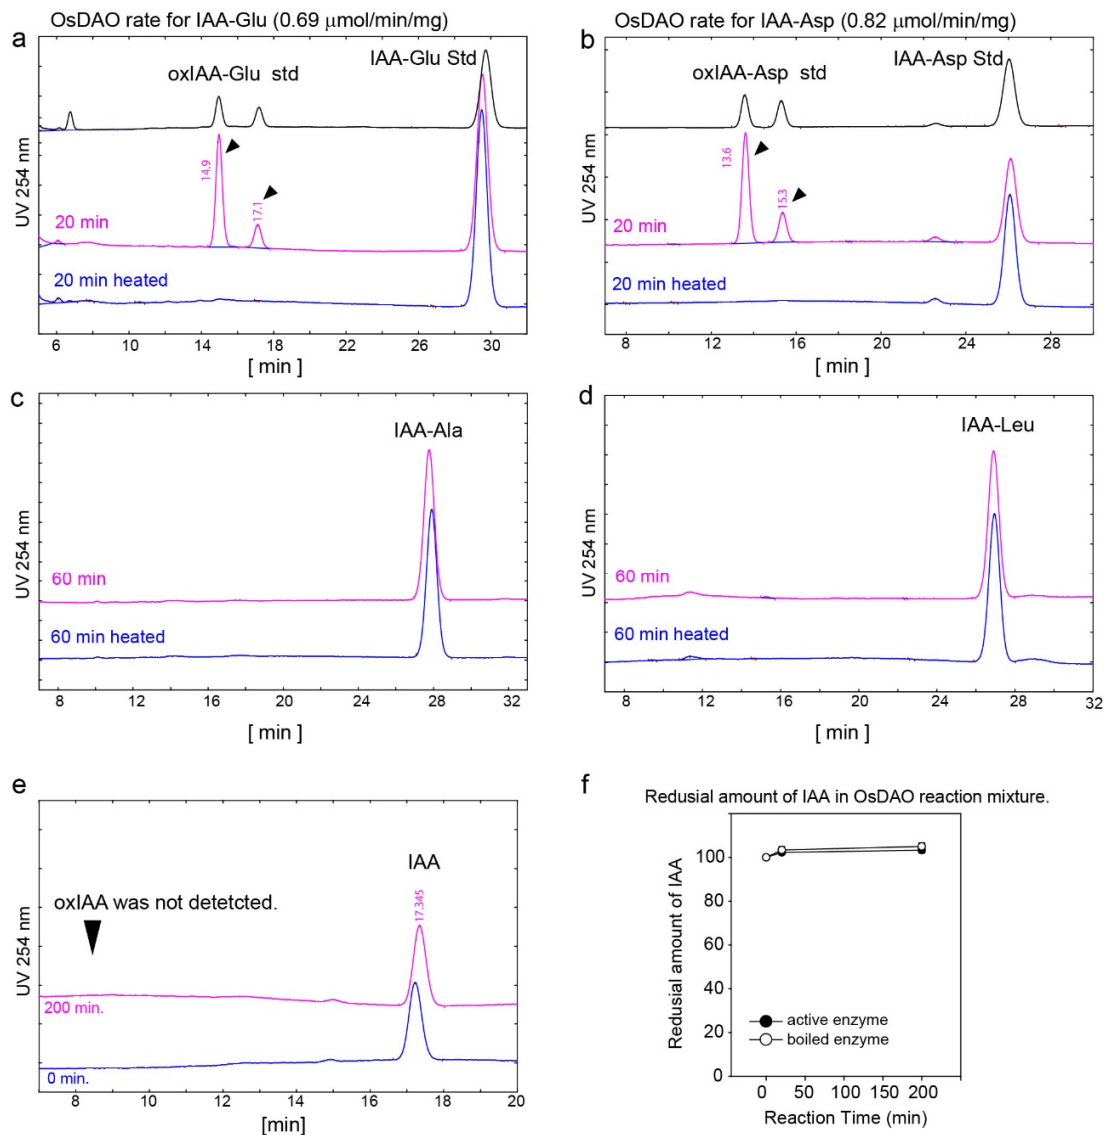

**Supplementary Fig. 6. OsDAO functions as an IAA-amino acid conjugate oxidase to produce oxIAA-amino acids.**

Recombinant OsDAO was expressed in *E. coli* BL21 harboring pCold-OsDAO vector and chaperonin vector pG-Tf2. (a and b) HPLC chromatogram of the reaction products of the OsDAO1 enzyme. IAA-Glu and IAA-Asp were used as substrates. OsDAO oxidized IAA-Glu and IAA-Asp to produce oxIAA-Glu and oxIAA-Asp, respectively. (c and d) HPLC chromatogram of the reaction mixture of the OsDAO enzyme. IAA-Ala and IAA-Leu were used as substrates. oxIAA-Ala and oxIAA-Leu were not detected, and more than 97% of IAA-Ala and IAA-Leu remained after 60 min of reaction. (e and f) oxIAA was not detected in the reaction mixture of OsDAO after 200 min incubation with IAA as the substrate (e), and IAA was not reduced after the reaction (n=4, f). The reaction was conducted under the same conditions as IAA-Glu (20 min reaction time).



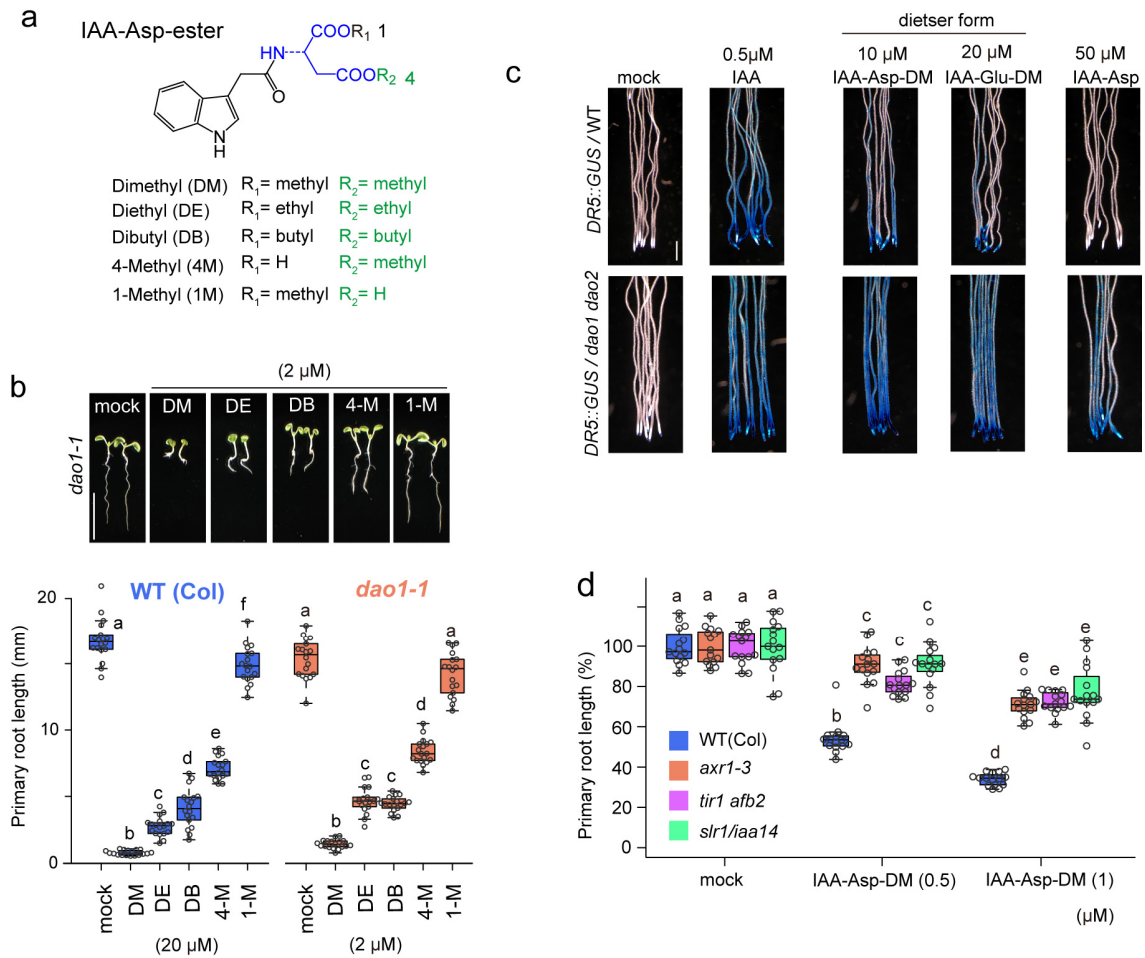

### Supplementary Fig. 7. IAA-Asp functions as a storage form of IAA.

(a) Chemical structures of membrane-permeable IAA-Asp diesters [dimethyl ester (DM), diethyl ester (DE), dibutyl ester (DB), and IAA-Asp monomethyl esters [4-methyl ester (4-M) and 1-methyl ester (1-M)]. (b) IAA-Asp diesters inhibited primary root growth as typical auxin activity in both *dao1-1* mutant and WT (Col) plants. Monomethyl esters of IAA-Asp (4-M and 1-M) were less active in the root auxin response than diesters of IAA-Asp. WT and *dao1-1* mutant seedlings were grown for 6 days on GM plates containing 20 μM compounds (for wild-type plants) or 2 μM compounds (for *dao1-1* mutants). The different letters represent statistical significance at  $P < 0.01$  (Tukey's HSD test,  $n = 18$ ). Scale bar, 10 mm. (c) Auxin-inducible *DR5::GUS* transgene expression in *dao1dao2* and WT seedlings. Six-day-old seedlings were cultured for 8 h in liquid GM media with chemicals (μM). The auxin-induced GUS activity was visualized by X-Gluc. Scale bar, 1 mm. (d) The auxin-resistant mutants *axr1-3*, *tir1afb2*, and *slr1/iaa14* were resistant to IAA-Asp-DM. The WT and mutant plants were grown on GM media (4 g/L agar) containing IAA containing IAA-Asp-DM for 6 days. Relative root length is shown as the percentage of that in mock-treated plants (100%). The different letters represent statistical significance at  $P < 0.005$  (Tukey's HSD test,  $n = 15$ ).

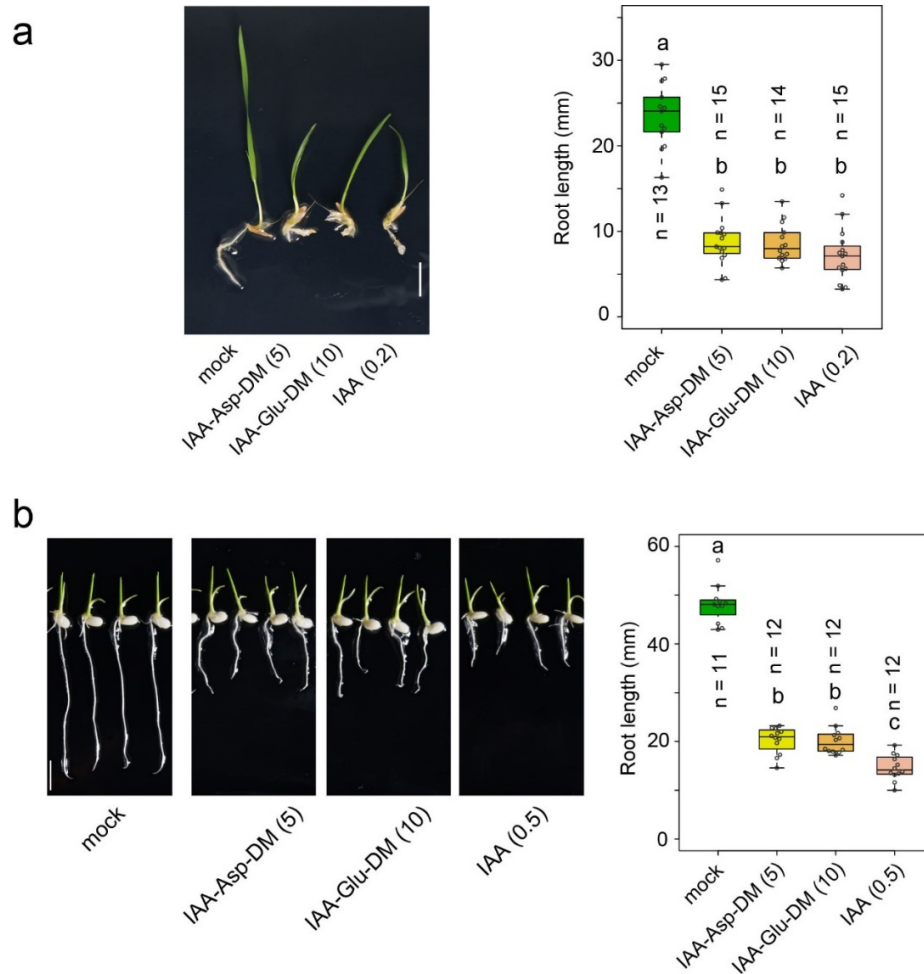

**Supplementary Fig. 8. IAA-amino acid diesters showed auxin activity in *Brachypodium distachyon* and rice (*Oryza sativa*).**

(a) *Brachypodium distachyon* Bd21 seeds were cultured for 8 days on GM agar medium with hormones. Scale bar, 10 mm. (b) *Oryza sativa* was cultured for 5 days in distilled water containing hormones. The different letters represent statistical significance at  $P < 0.001$  (Tukey's HSD test), and n indicates the number of plants analyzed. Scale bar, 10 mm. Similar to IAA, both IAA-Asp-DM and IAA-Glu-DM inhibited root growth in *B. distachyon* and rice seedlings.

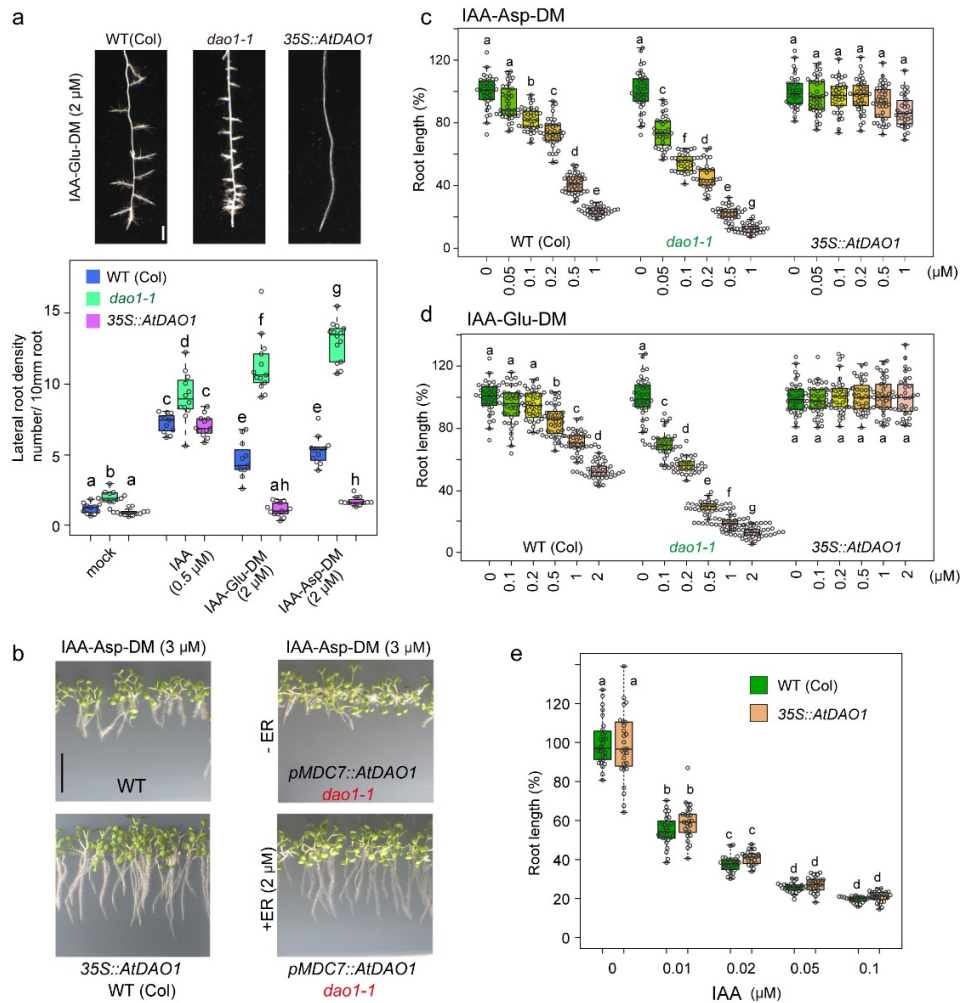

### Supplementary Fig. 9. AtDAO1 modulates auxin activity derived from IAA-Asp and IAA-Glu.

(a) Lateral root formation in *dao1-1* and *AtDAO1*-overexpressing plants (*35S::AtDAO1*). Five-day-old plants were incubated for an additional 3 days on a horizontal GM plate containing IAA and conjugates. IAA induced lateral root formation of WT (Col), *dao1-1*, and *35S::AtDAO1* plants to the same extent. IAA-Asp-DM and IAA-Glu-DM induced lateral root formation in WT (Col) and *dao1-1* but not in *35S::AtDAO1* plants. The *dao1-1* mutant was more sensitive to the conjugates than WT plants. The different letters represent statistical significance at  $P < 0.001$  (Tukey's HSD test,  $n = 11-14$ ). Scale bar, 1 mm. (b) Phenotype of the *AtDAO1* overexpression line. The seedlings were grown vertically for 7 days on GM plates containing 2  $\mu$ M estradiol (ER) with or without IAA-Asp-DM (3  $\mu$ M). ER was added to induce the *AtDAO1* transgene in *pMDC7::AtDAO1* in the *dao1-1* mutant. Scale bar, 10 mm. (c, d) The primary root length of WT and *35S::AtDAO1* and *dao1-1* mutants cultured for 6 days on GM plates (4 g/L agar) containing IAA-Asp-DM (c) and IAA-Glu-DM (d). Relative root length is shown as the percentage of that in mock-treated plants (100%). The different letters represent statistical significance at  $P < 0.001$  (Tukey's HSD test,  $n = 34-40$ ). (e) *35S::AtDAO1* and WT roots showed the same sensitivity to IAA. Seedlings were cultured on a vertical GM plate (6 g/L gellan gum) containing IAA for 6 days. The different letters represent statistical significance at  $P < 0.001$  (Tukey's HSD test,  $n = 22-28$ ). *AtDAO1* predominantly inactivates IAA-amino acid conjugates rather than IAA in planta.

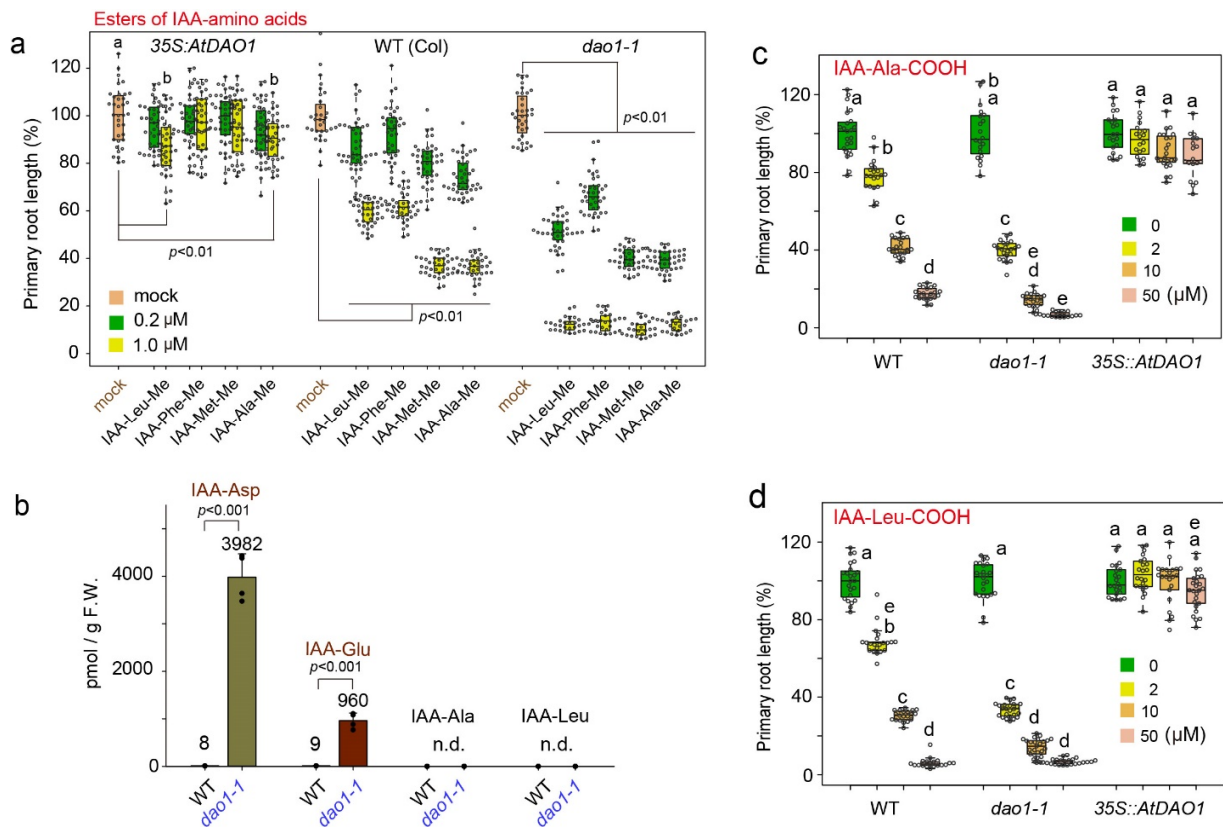

**Supplementary Fig. 10. Endogenous levels of IAA-amino acid conjugates in wild-type and *dao1-1*, and the effects of IAA-amino acid conjugates on *dao1* mutants.**

(a) Effects of IAA-amino acid esters on root growth in the *dao1-1* and *35S::AtDAO1* lines. P values were determined by Tukey's HSD relative to mock treatment (n= 23–44). (b) Endogenous levels of IAA-Asp, IAA-Glu, IAA-Ala, and IAA-Leu in WT (Col) and *dao1-1* mutant plants. IAA-amino acid conjugates in 7-d-old seedlings were measured by LC-MS/MS. IAA-Asp and IAA-Glu accumulated substantially in the *dao1-1* mutant. IAA-Ala and IAA-Leu levels were below our detection limit in both the WT and *dao1-1* mutant plants. The different letters represent statistical significance at  $P < 0.001$  (Tukey's HSD test, n = 4). (c and d) Effects of IAA-Ala and IAA-Leu on root growth in the *dao1-1* and *35S::AtDAO1* lines. (a, c, and d) Seedlings were grown for 6 days on GM plates (4 g/L agar) with IAA-Ala and IAA-Leu. After cultivation, the primary root lengths of the WT (Col), *35S::AtDAO1*, and *dao1-1* mutant plants were measured. Relative root length is shown as the percentage of that in mock-treated plants (100%). The *35S::AtDAO1* overexpression line was resistant to various IAA-amino acid conjugates, but the *dao1-1* mutant was hypersensitive to these conjugates. The different letters represent statistical significance at  $P < 0.001$  [Tukey's HSD test, (c) n = 19–26, (d) n = 17–23].

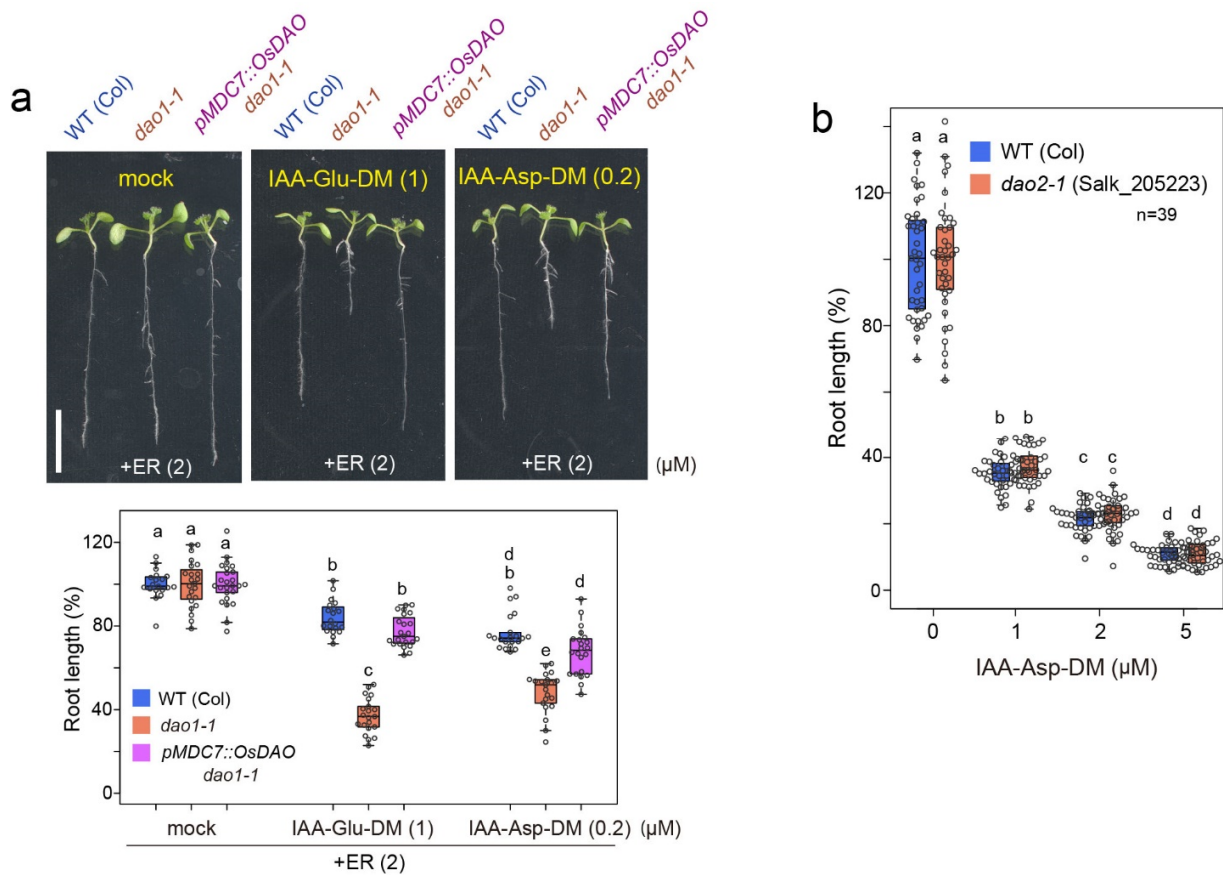

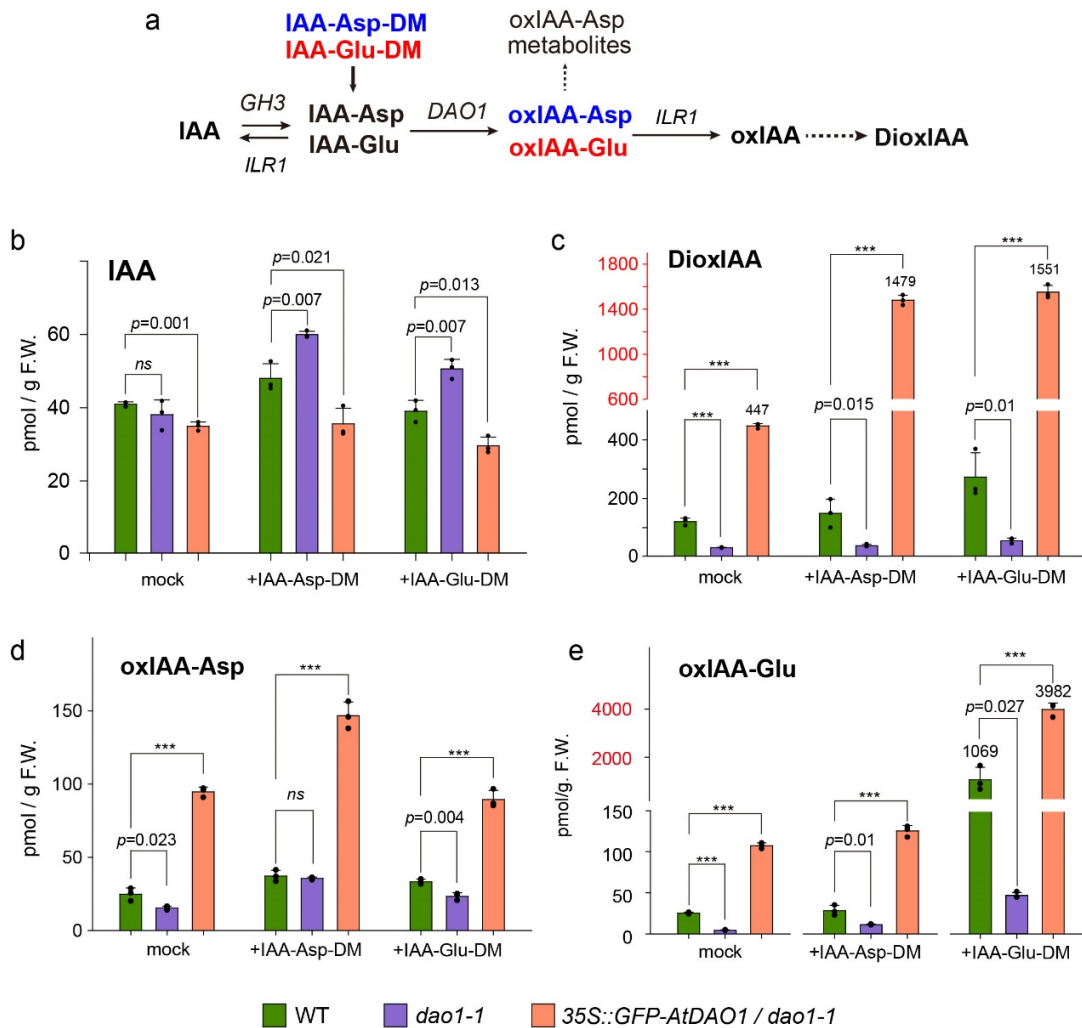

**Supplementary Fig. 12. Endogenous amounts of IAA and its metabolites in *dao1-1* and *GFP-AtDAO1*-overexpressing plants.**

(a) Our working model of the IAA inactivation pathway is shown. (b–e) Seven-day-old WT, *dao1-1*, and *35S::GFP-AtDAO1* in *dao1-1* seedlings were incubated in liquid GM media with or without 0.5  $\mu$ M IAA-Asp-DM and IAA-Glu-DM for 20 h. After extensive washing of seedlings with fresh water, the metabolites were analyzed with LC-MS/MS. The levels of endogenous IAA (b), DioxIAA (c), oxIAA-Asp (d), and oxIAA-Glu (e) in WT, *dao1-1*, and the *GFP-AtDAO1*-overexpressing *dao1-1* line are shown. The values shown are the means  $\pm$  SD (\*\*\*)  $P < 0.001$ , ns, not significant, two-tailed Student's *t*-test,  $n = 3$ ).

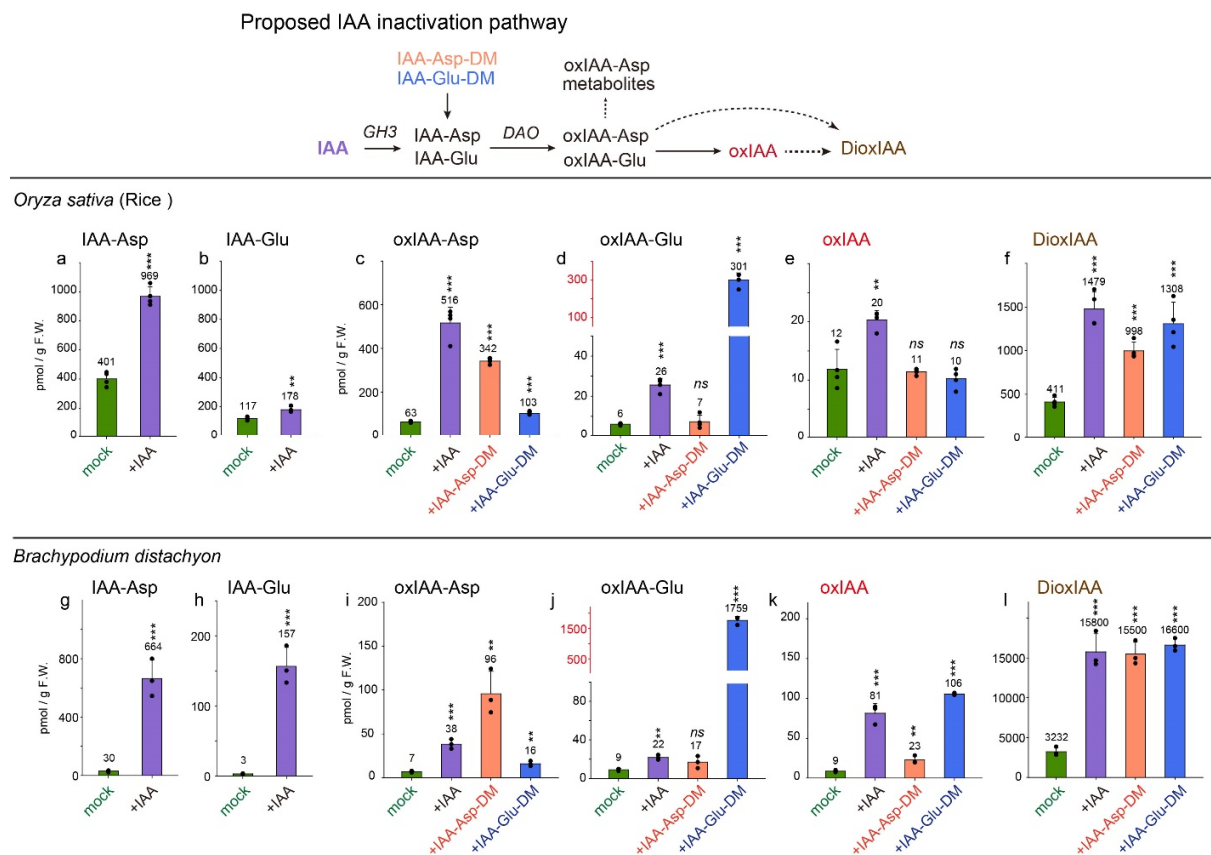

**Supplementary Fig. 13. Endogenous amounts of IAA metabolites in rice (*Oryza sativa*) and *Brachypodium distachyon*.**

Our working model of the IAA inactivation pathway is shown. (a–f) *Oryza sativa* cv. Nipponbare was grown on agar (3 g/L) for 5 days at 25 °C under continuous light after 2 days of incubation at 28 °C. The plants were incubated in water with 1 μM compounds for 24 h. After extensive washing of seedlings with fresh water, the root was excised. The metabolites in the root were analyzed with LC-MS/MS. The values shown are the means ± SD (\*\*\*)  $P < 0.001$ , \*\*  $P < 0.01$ , ns: not significant, Two-tailed Student's  $t$ -test [vs mock treatment],  $n = 4$ ). (g–l) *Brachypodium distachyon* Bd21 was grown hydroponically with 1/10 GM medium (without sucrose) for 15 days at 24 °C under continuous light. The plants were incubated in water with 1 μM compounds for 24 h. After extensive washing of seedlings with fresh water, the root was excised. The metabolites in the root were analyzed with LC-MS/MS. The values shown are the means ± SD (\*\*\*)  $P < 0.001$ , \*\*  $P < 0.01$ , ns: not significant, Two-tailed Student's  $t$ -test [vs mock treatment],  $n = 3$ ).

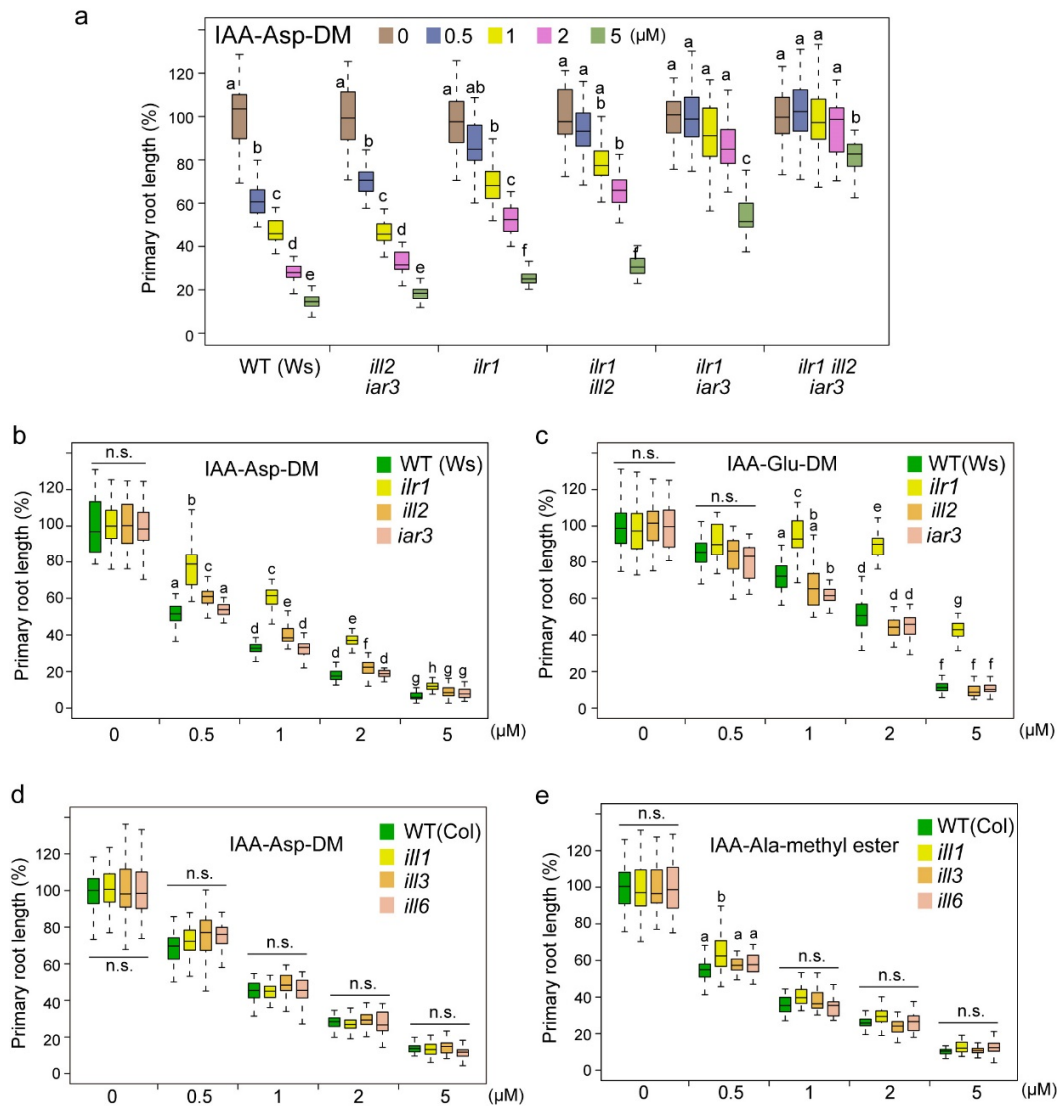

**Supplementary Fig. 14. ILR1/ILL enzymes are responsible for the conversion of IAA-Asp and IAA-Glu to IAA.**

(a–e) Effects of IAA-Asp-DM and IAA-Glu-DM on root growth of the single, double, and triple mutants of *ilr1*, *ill2*, and *iar3*. The *ilr1* and *iar3* (*ilr1-1* and *ilr3-2*) mutants are EMS lines, and the *ill2* mutant (*ill2-1*) is a T-DNA insertion line in Ws background. (d and e) Effects of IAA-Asp-DM and IAA-Glu-DM on root growth of *ill1*, *ill3*, and *ill6* single mutants. The *ill1*, *ill3*, and *ill6* mutants are T-DNA insertion lines in Col background. (a–e) The seedlings were grown for 7 days on GM plates with or without the indicated conjugates. Relative root length is shown as the percentage of that in mock-treated plants (100%). The different letters represent statistical significance at  $P < 0.001$  (ns: not significant, Tukey's HSD test, (a)  $n = 32\text{--}42$  (average=36), (b)  $n = 33$ , (c)  $n = 35$ , (d)  $n = 37$ , (e)  $n = 30$ ).



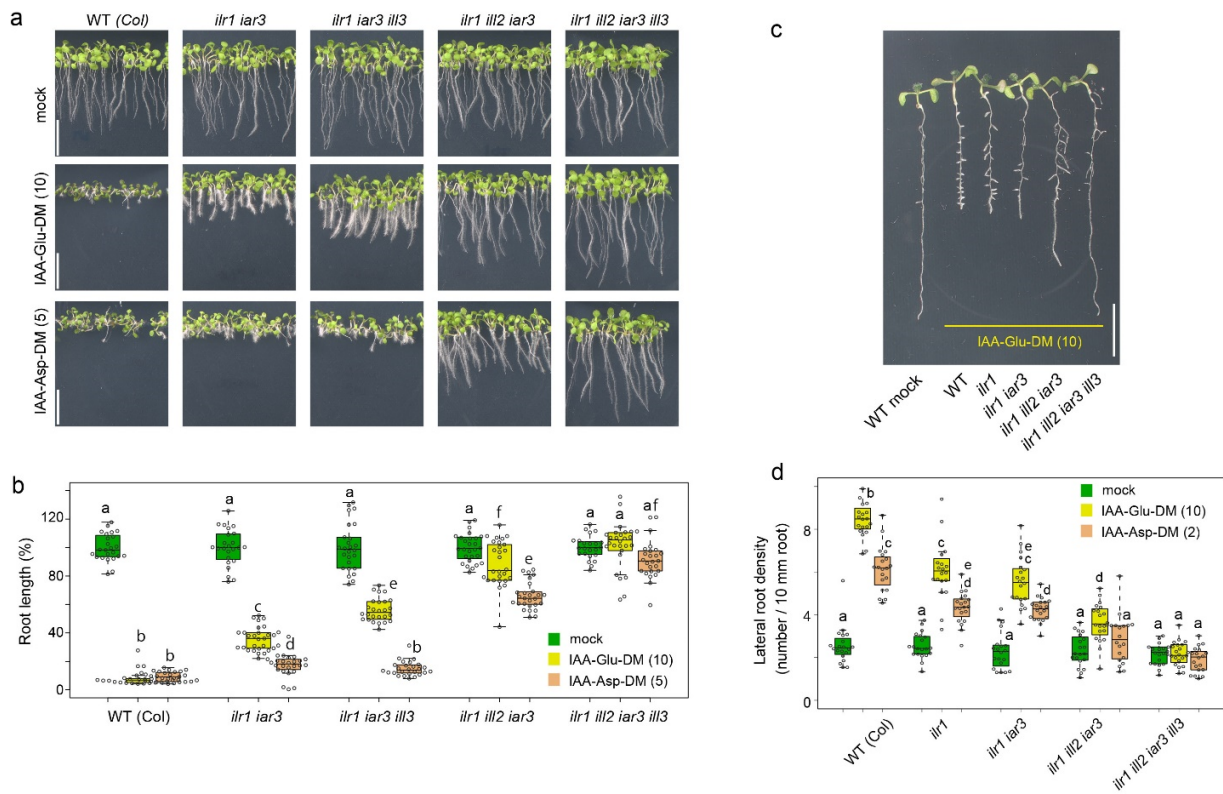

**Supplementary Fig. 15. *ILR1*, *ILL2*, *IAR3*, and *ILL3* are required for the conversion of IAA-Asp and IAA-Glu to IAA.**

(a and b) The sensitivity of root growth of *ilr1*, *ill2*, *iar3*, and *ill3* multiple mutants to IAA-Asp-DM and IAA-Glu-DM. The *ilr1/ill* mutants are T-DNA insertion lines (Col background). The seedlings were vertically grown for 6 days on GM plates (6 g/L gellan gum) with or without the conjugates. Relative root length is shown as the percentage of that in mock-treated plants (100%). Scale bars, 10 mm. (c and d) Lateral root formation of *ilr1*, *ill2*, *iar3*, and *ill3* multiple mutants (Col background) treated with IAA-Asp-DM and IAA-Glu-DM. Five-day-old plants were incubated for an additional 3 days on a horizontal GM plate containing hormones. Scale bars, 10 mm. The different letters represent statistical significance at  $P < 0.001$  [Tukey's HSD test, (b)  $n = 24\text{--}30$ , (d)  $n = 20$ ].

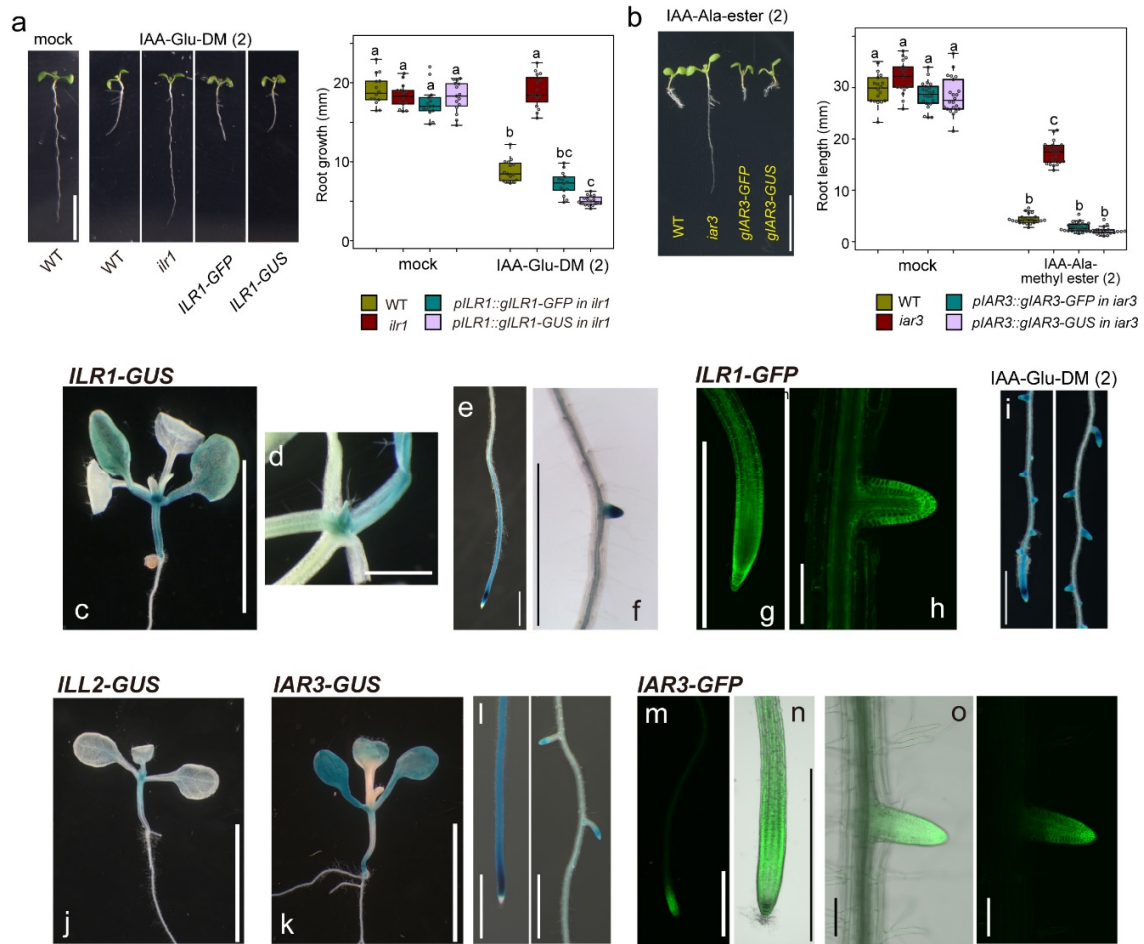

### Supplementary Fig. 16. Expression patterns of *ILR1*, *ILL2* and *IAR3*.

(a) The *pILR1::ILR1-GFP* and *pILR1::ILR1-GUS* transgenes functionally complemented the IAA-Glu-DM-insensitive phenotype of the *ilr1* mutant (Col background). The *pILR1::ILR1-GFP* and *pILR1::ILR1-GUS* plants were grown on GM plates containing 2  $\mu$ M IAA-Glu-DM for 7 days. Scale bar, 10 mm. (b) *pIAR3::IAR3-GFP* and *pIAR3::IAR3-GUS* transgenes functionally complemented the IAA-Ala ester-insensitive phenotype of the *iar3* mutant (Col background). The *pIAR3::IAR3-GFP* and *pIAR3::IAR3-GUS* plants were grown on GM plates containing 2  $\mu$ M IAA-Ala methyl ester for 6 days. Scale bar, 10 mm. The different letters represent statistical significance at  $P < 0.001$  [Tukey's HSD test, (a)  $n = 14-16$ , (b)  $n = 15-21$ ]. (c-h). *pILR1::ILR1-GUS* and *pILR1::ILR1-GFP* seedlings were grown for 9 days on vertical GM plates. (i) Six-day-old *pILR1::ILR1-GUS* seedlings were incubated with 2  $\mu$ M IAA-Glu-DM for another 3 days. The *pILR1::ILR1-GUS* plants were placed in X-Gluc staining buffer until sufficiently stained. (j) *ILL2-GUS* expression in 8-day-old *pILL2::ILL2-GUS* seedlings. (k-o), *pIAR3::IAR3-GUS* (k and l) and *pIAR3::IAR3-GFP* (m-o) plants were grown for 9 days on vertical GM plates. At least five seedlings from three independent lines were examined. This experiment was repeated three times independently with similar results. Scale bars, 10 mm (c, j, and k), 1 mm (d, e, f, g, i, l, m, n), and 100  $\mu$ m (h and o).

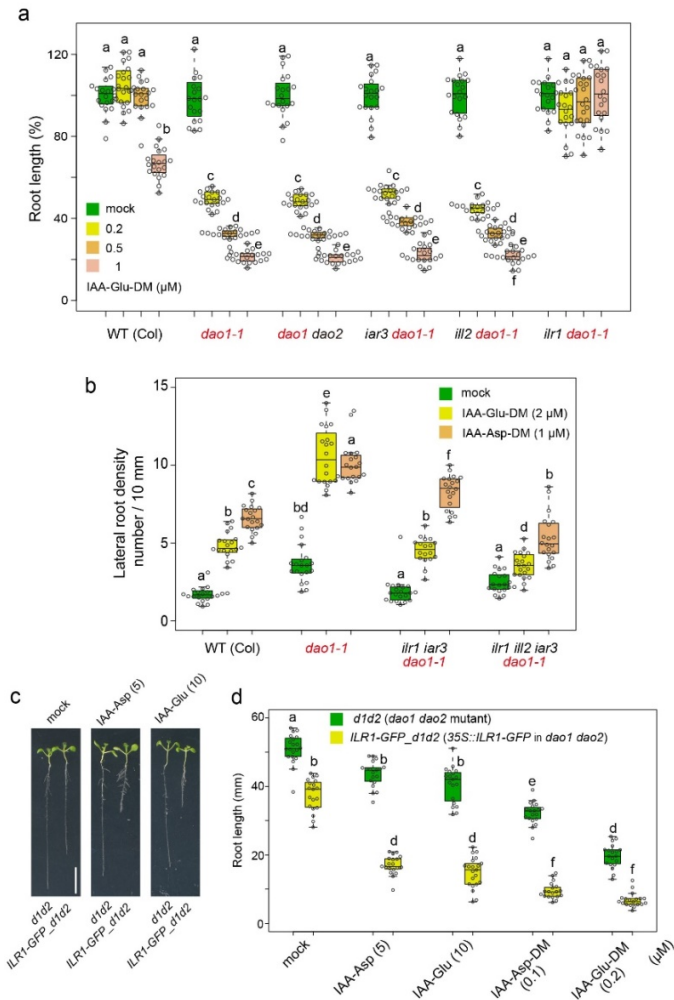

**Supplementary Fig. 17. The responses of the *dao1* mutant to IAA-Asp and IAA-Glu esters depend on ILR1.**

(a) Effects of IAA-Glu-DM on root growth of *dao1 ilr/ill* mutants (*dao1-1*, *dao1 dao2*, *iar3 dao1-1*, *ill2 dao1-1*, and *ilr1 dao1-1*). The seedlings were grown for 6 days on GM plates (4 g/L agar) containing IAA-Glu-DM. Relative root length is shown as the percentage of that in mock-treated plants (100%). The *ilr1* mutation decreased high sensitivity of root inhibition in the *dao1-1* mutant. The different letters represent statistical significance at  $P < 0.01$  (Tukey's HSD test,  $n = 20$ ). (b) Effects of IAA-Asp-DM and IAA-Glu-DM on lateral root formation of *dao1 ilr/ill* mutants (*dao1-1*, *ilr1 iar3 dao1-1*, and *ilr1 ill2 iar3 dao1-1*). The seedlings were grown vertically for 6 days on GM plates and then transferred to a horizontal GM plate containing compounds. The seedlings were cultured for another 3 days. The root length and lateral root number were measured. The different letters represent statistical significance at  $P < 0.01$  (Tukey's HSD test,  $n = 20$ ). (c and d) Overexpression of the ILR1-GFP fusion protein enhanced the sensitivity of the *dao1 dao2* mutant to IAA-Asp and IAA-Glu and their diesters (IAA-Asp-DM and IAA-Glu-DM). The seedlings were grown vertically for 8 days on GM plates (6 g/L gellan gum) containing IAA conjugates. Primary root length was measured. Scale bar, 10 mm. The different letters represent statistical significance at  $P < 0.001$  (Tukey's HSD test,  $n = 19-20$ ).

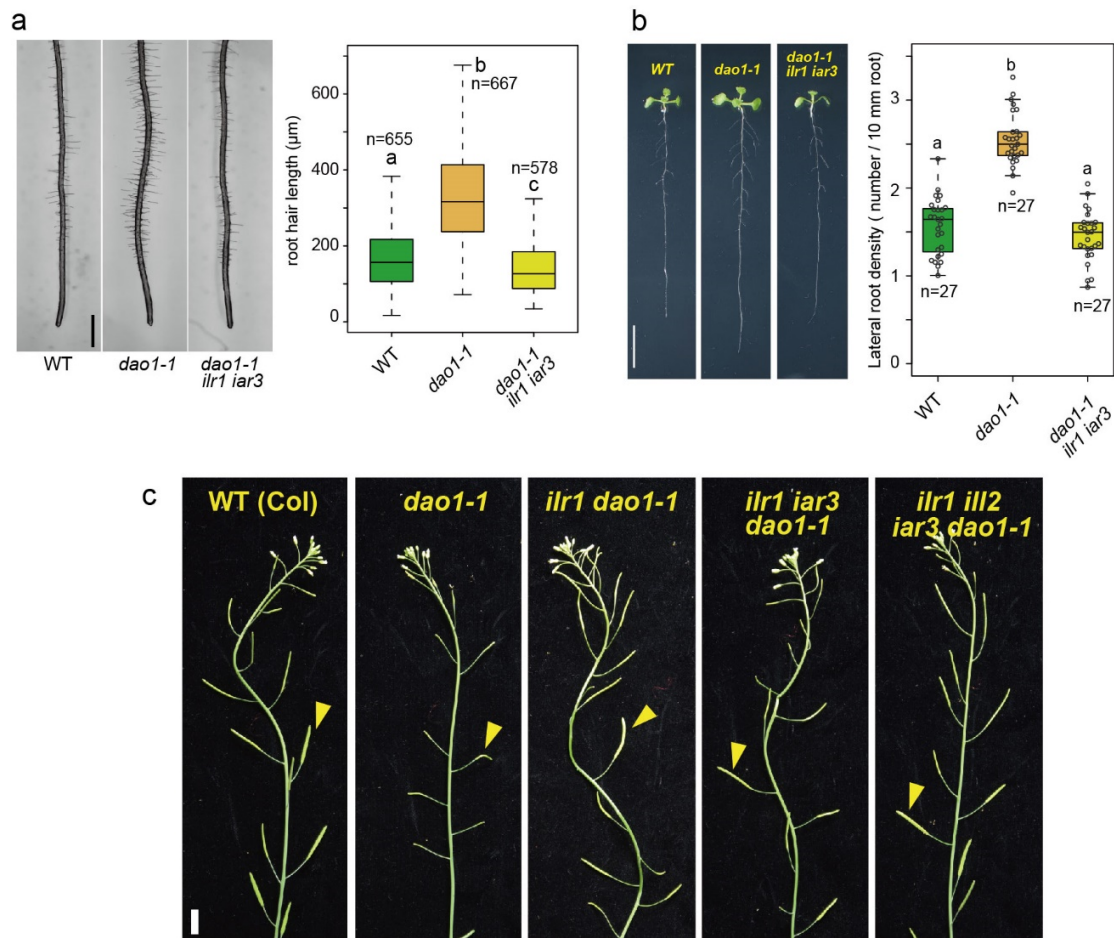

**Supplementary Fig. 18. The *ilr1 iar3* loss-of-function mutation restored *dao1-1* phenotypes.**

(a) Root hair length of wild-type (Col), *dao1-1*, and *ilr1 iar3 dao1-1* triple mutant plants. Scale bar, 1 mm. The seedlings were grown vertically for 9 days on GM plates (6 g/L gellan gum). Primary root hair length was measured. The different letters represent statistical significance at  $P < 0.001$  (Tukey's HSD test). The values shown are the means, and n indicates the number of root hairs analyzed. Scale bar, 1 mm. (b) Lateral root density in wild-type, *dao1-1*, and *ilr1 iar3 dao1-1* mutant plants. The seedlings were grown vertically for 9 days on GM plates. The number of lateral roots and root length were measured. Scale bar, 10 mm. The different letters represent statistical significance at  $P < 0.01$  (Tukey's HSD test).  $P = 0.348$  for letter a. (c) Phenotypes of primary inflorescences from 40-day-old WT (Col), *dao1-1*, *ilr1 dao1-1*, *ilr1 iar3 dao1-1* and *ilr1 ill2 iar3 dao1-1* mutant plants (Col background). The *ilr1* mutation restored less fertility in primary inflorescences in the *dao1-1* mutant. At least five plants from each line were examined. Scale bar, 10 mm. This experiment was repeated three times independently.

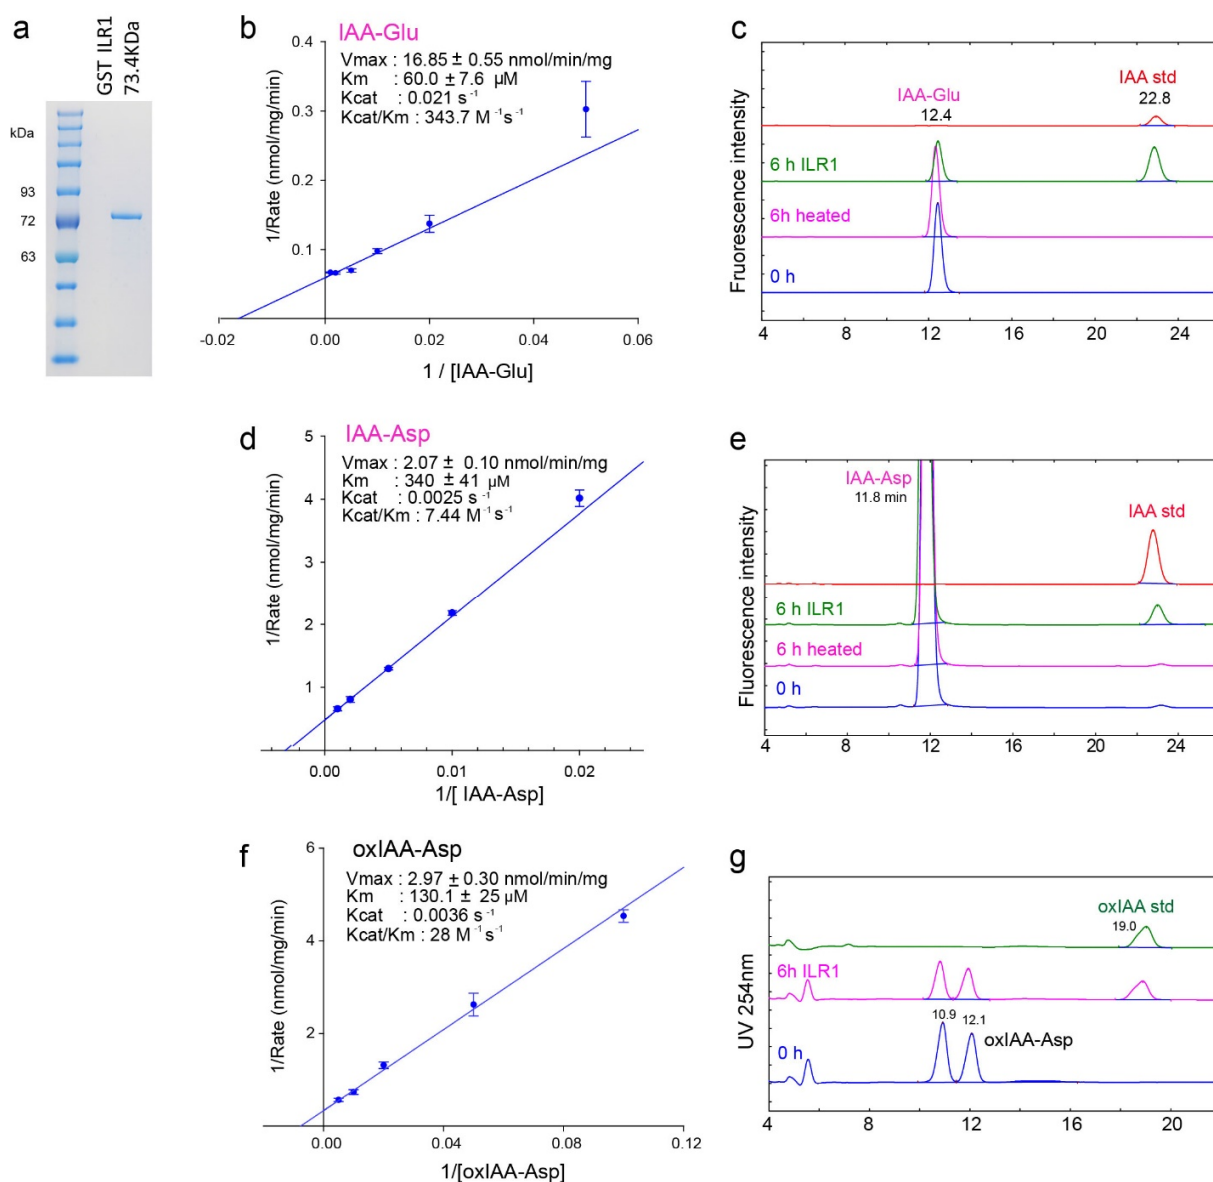

**Supplementary Fig. 19. GST-ILR1 hydrolyzed both oxIAA-amino acid conjugates and IAA-amino acid conjugates.**

(a) SDS-PAGE analysis of purified GST-ILR1 (73.4 kDa) protein expressed in a wheat germ cell-free protein expression system. This experiment was repeated three times independently with similar results. (b) Lineweaver–Burk plot and kinetics parameters of GST-ILR1 for oxIAA-Asp (n=3). (c) HPLC chromatogram of the reaction products of GST-ILR1. oxIAA-Asp was used as a substrate. (d) Lineweaver–Burk plot and kinetics parameters of GST-ILR1 for IAA-Glu (n=4). Error bars, SE. (e) HPLC chromatogram of the reaction products of GST-ILR1. IAA-Glu was used as a substrate. Error bars, SE. (f) Lineweaver–Burk plot and kinetics parameters of GST-ILR1 for IAA-Asp (n=4). Error bars, SE. (g) HPLC chromatogram of the reaction products of GST-ILR1. IAA-Asp was used as a substrate.

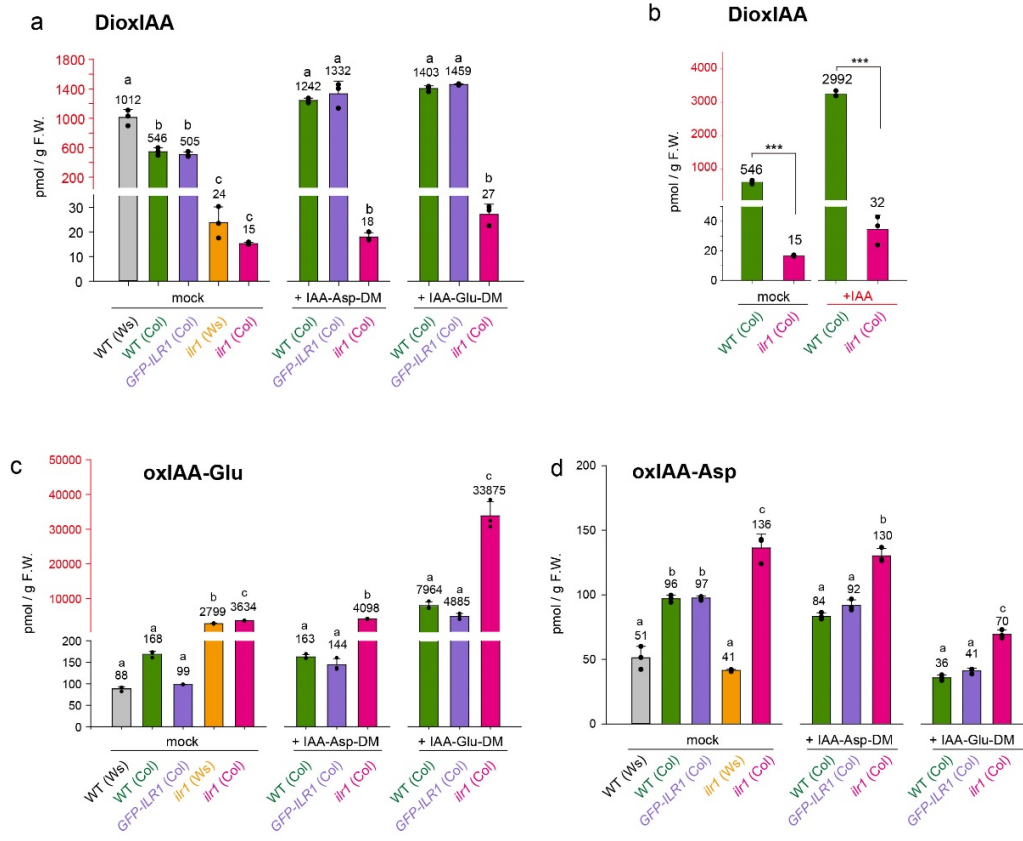

**Supplementary Fig. 20. Endogenous amounts of IAA-Asp and dioxIAA in *ilr1* mutant and the complementation line.**

(a–d) Seven-day-old seedlings of wild-type, *ilr1-1* (Ws, EMS mutant), *ilr1* (Col, SAIL\_631\_F01) and *pILR1::ILR1-GFP* in *ilr1* (Col) complementation lines were incubated in liquid GM media with or without 0.5  $\mu$ M IAA, IAA-Asp-DM or IAA-Glu-DM for 24 h. After extensive washing of seedlings with fresh water, the metabolites [DioxIAA (a, b), oxIAA-Glu (c), oxIAA-Asp (d)] were analyzed with LC-MS/MS for the same sample in Fig. 6c. (a,c,d) The values shown are the means  $\pm$  SD ( $n = 3$ ). The different letters represent statistical significance at  $P < 0.001$  (Tukey's HSD test). (b) The values shown are the means  $\pm$  SD (\*\* $P < 0.001$ , two-tailed Student's *t*-test,  $n = 3$ ).

## Supplementary Methods

### Plasmid construction and transformation

Full-length cDNA clones of *AtDAO1* and *AtDAO2*, in this work was developed by the plant genome project of RIKEN Genomic Sciences Center (Japan) and cloned into the pDONR-ZEO entry vector by Gateway BP reaction. The genomic fragments of *gILL1* (3.9 kb), *gILL2* (3.2 kb), and *gIAR3* (4.3 kb), including the promoter regions (*pILL1*; 1.9 kb, *pILL2*; 1.4 kb, *pIAR3*; 2.4 kb), were amplified by KOD One (Toyobo, JAPAN) from *Arabidopsis* genomic DNA with the corresponding primers listed in Supplementary table 1. The amplified fragments were cloned into the pDONR-ZEO entry vector by Gateway BP reaction. The ORFs of *OsDAO* [*Oryza sativa*, Os04g0475600] and *BdDAO* [*Brachypodium distachyon*, XP\_003579963] were synthesized and codon-optimized for expression in *Arabidopsis thaliana* and cloned into the pDONR-ZEO entry vector by BP clonase. To generate the  $\beta$ -estradiol-inducible constructs, *AtDAO1* in pDONR-ZEO were cloned into the pMDC7 destination vector<sup>1</sup> by Gateway LR reaction. The *pILL1::genomeILL1-GFP/GUS*, *pILL2::genomeILL2-GFP/GUS*, and *pIAR3::genomeIAR3-GFP/GUS* constructs were generated by LR reaction of pDONR-proILL1::genomeILL1, pDONR-proILL2::genomeILL2, and pDONR-proIAR3::genomeIAR3 with pGWB504 and pGWB533 C-terminal fusions destination vectors. 35S::GFP-AtDA1 and 35S::GFP-OsDAO were generated by LR reaction of pDONR-AtDAO1\_ORF and pDONR-OsDAO\_ORF with pGWB506 and 35S::N-terminal GFP fusion destination vectors<sup>2</sup>.

35S::GFP-DAO2 and 35S::GFP-BdDAO were generated by LR reaction of pDONR-AtDAO2\_ORF and pDONR-BdDAO\_ORF with pMDC43 and 35S::N-terminal GFP fusion destination vectors. 35S::genomeILL1-GFP, 35S::genomeILL2-GFP, and 35S::genomeIAR3-GFP were generated by LR reaction of pDONR-genomeILL1, pDONR-genomeILL2 and pDONR-genomeIAR3 with pMDC83 and 35S::C-terminal GFP fusion destination vectors<sup>1</sup>. Constructs were introduced into *Agrobacterium tumefaciens* GV3101 (pMP90). Wild-type and mutant plants were transformed by the floral dip method<sup>3</sup>, and homozygous lines were selected.

### HPLC analysis of IAA metabolites

In HPLC analysis, IAA, IAA-Asp, IAA-Glu, IAA-Ala, and IAA-Leu were detected by a fluorescent detector (Ex 280 nm, Em 360 nm) and UV absorption detector (254 nm). The oxIAA, oxIAA-Asp, oxIAA-Glu, oxIAA-Ala, and oxIAA-Leu were detected with UV detector (absorption at 254 nm).

**For the analysis of GST-ILR1 reaction**, the oxIAA, oxIAA-Glu, and oxIAA-Asp were analyzed by Inertsil ODS-3 (ODS, 150 × 4.6 mm ID, GL-Science, Japan) with 0.5 mL/min flow rate of the mobile phase [MeOH : H<sub>2</sub>O=30 : 70 containing 10 mM H<sub>3</sub>PO<sub>4</sub>] in Fig.4a and Supplementary Fig. 19c. The IAA, IAA-Asp, and IAA-Glu were analysed by a Inertsil ODS-3 (150 × 4.6 mm ID) with 0.5 mL/min flow rate of the mobile phase [MeOH : H<sub>2</sub>O=43 : 57 containing 10 mM H<sub>3</sub>PO<sub>4</sub>] in Supplementary Fig. 19e and 19g.

**For the analysis of AtDAO1 reaction**, the oxIAA-Asp and IAA-Asp was analyzed by Cosmosil C<sub>18</sub>-MS-II column (ODS, 150 × 4.6 mm ID, Nacalai-tesque, Japan) with 0.5 mL/min flow rate of the mobile phase [MeOH : H<sub>2</sub>O=30 : 70 containing 10 mM phosphoric acid] in Supplementary Fig. 4a. The oxIAA-Glu and IAA-Glu were analyzed by Cosmosil C<sub>18</sub>-MS-II column with 0.5 mL/min flow rate of the mobile phase [MeOH : H<sub>2</sub>O=30 : 70 containing 10 mM phosphoric acid] in Supplementary Fig. 4d. The IAA-Ala and oxIAA-Ala were analyzed by Cosmosil C<sub>18</sub>-MS-II column (ODS, 150 × 4.6 mm ID, Nacalai-tesque, Japan) with 0.5 mL/min flow rate of mobile phase [MeOH : H<sub>2</sub>O=60 : 40 containing 10 mM H<sub>3</sub>PO<sub>4</sub>], and the IAA-Leu and oxIAA-Leu were analyzed by Cosmosil C<sub>18</sub>-MS-II column (150 × 4.6 mm ID) with 0.5 mL/min flow rate of mobile phase [MeOH : H<sub>2</sub>O=50 : 50 containing 10 mM H<sub>3</sub>PO<sub>4</sub>] in Supplementary Fig. 4d. The IAA and oxIAA were analysed by a Inertsil ODS-3 (150 × 4.6 mm ID) with 0.5 mL/min flow rate of the mobile phase [MeOH : H<sub>2</sub>O=43 : 57 containing 10 mM H<sub>3</sub>PO<sub>4</sub>] in Supplementary Fig. 4F. IAA-glucoside and IAA-Asp-dimethyl ester were separated by Inertsil ODS3 column (150 × 4.6 mm ID) and Cosmosil C<sub>18</sub>-MS-II column (150 × 4.6 mm ID) with the eluates,

MeOH : H<sub>2</sub>O=45 : 55 containing 10 mM H<sub>3</sub>PO<sub>4</sub> and MeOH : H<sub>2</sub>O=50 : 50 containing 10 mM H<sub>3</sub>PO<sub>4</sub> (0.5 mL/min), respectively in fig. Supplementary Fig. 4e.

**For the analysis of OsDAO reaction**, the oxIAA-Glu, oxIAA-Asp, IAA-Glu, and IAA-Asp were analyzed by InertSustain C18 (150 × 4.6 mm ID, GL-Science, Japan) with 0.5 mL/min flow rate of the mobile phase [MeOH : H<sub>2</sub>O=25 : 75 containing 10 mM phosphoric acid] in Supplementary Fig. 6a and 6b. The IAA-Ala, IAA-Leu, oxIAA-Ala and oxIAA-Leu were also analysed by InertSustain C18 (150 × 4.6 mm ID) with 0.5 mL/min flow rate of the mobile phase [MeOH : H<sub>2</sub>O=30 : 70 containing 10 mM H<sub>3</sub>PO<sub>4</sub>] in Supplementary Fig. 6c and with 0.5 mL/min flow rate of the mobile phase [MeOH : H<sub>2</sub>O=50 : 50 containing 10 mM H<sub>3</sub>PO<sub>4</sub>] in Supplementary Fig. 6d. The IAA and oxIAA were analysed by InertSustain C18 (150 × 4.6 mm ID) with 0.5 mL/min flow rate of the mobile phase [MeOH : H<sub>2</sub>O=57 : 43 containing 10 mM H<sub>3</sub>PO<sub>4</sub>] in Supplementary Fig. 6e and 6f.

### Molecular docking

The crystal data of AtDAO1 structure (PDB ID: 6KWB) containing 2-oxoglutarate and Mg ion were edited by Discovery Studio visualizer (Dassalt System, France). The macromolecule file (PDBQT) of AtDAO1 was prepared by AutoDockTools (MGL Tools software, The Scripps Research Institute). The ligand structure was prepared by Chem3D software (PerkinElmer ChemOffice, USA). The docking calculation of IAA and IAA-amino acid conjugates on AtDAO1 were performed by AutoDock Vina docking software<sup>4</sup>. The calculated coordinates of AtDAO1 and substrate were visualized by Discovery Studio visualizer.

### Histochemical GUS Analysis

For GUS histochemical analysis, the seedlings were washed with GUS staining buffer (100 mM sodium phosphate, pH 7.0, 10 mM EDTA, 0.5 mM K<sub>4</sub>Fe(CN)<sub>6</sub>, 0.5 mM K<sub>3</sub>Fe(CN)<sub>6</sub>, and 0.1% Triton X-100), transferred to GUS staining buffer containing 1 mM 5-bromo-4-chloro-3-indolyl-β-D-glucuronide and incubated at 37 °C until sufficient staining developed. After the tissue was sufficiently decolorized with 75% (vol/vol) ethanol to remove chlorophyll, individual representative plant tissues were photographed under a microscope (Olympus, SZX16) equipped with a camera.

### Synthesis of chemicals

#### General experimental conditions.

<sup>1</sup>H and <sup>13</sup>C-NMR spectra were recorded on ECS400 and ECZ400 spectrometers (JEOL, Japan). Chemical shifts are shown as δ values from TMS as the internal reference. Peak multiplicities are quoted in Hz. Mass spectra were measured on autoflex speed MALDI-TOF MS (Bruker, Japan), and Agilent 6420 Triple Quad LC-MS (Agilent Technologies, USA). Column chromatography was carried out on columns of silica gel 60 (230–400 mesh, Merck, Japan). All chemicals were purchased from Tokyo Chemical Industry Japan (Japan), FUJIFILM Wako Pure Chemical (Japan) and Sigma-Aldrich Japan (Japan) unless otherwise stated.

#### Synthesis of kakeimide

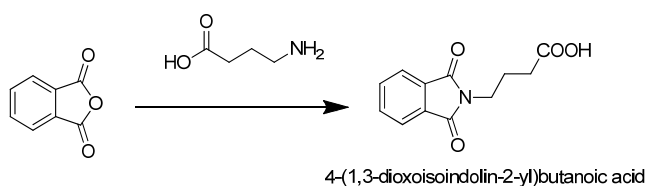



4-(1,3-dioxisoindolin-2-yl)butanoic acid [CAS 3130-75-4] was synthesized according to the method previously described<sup>5</sup>. The 4-(1,3-dioxisoindolin-2-yl)butanoic acid was obtained as colorless powder (1358 mg, 75% yield). <sup>1</sup>H-NMR (400 MHz, CDCl<sub>3</sub>) δ 7.85 (m, 2H), 7.72 (m, 2H), 3.77 (t, J = 6.9 Hz, 2H), 2.42 (t, J = 7.6 Hz, 2H), 2.05-1.98 (m, 2H); <sup>13</sup>C-NMR (100 MHz, CDCl<sub>3</sub>) δ 178.5, 168.4, 134.0, 132.0, 123.3, 37.1, 31.3, 23.6.

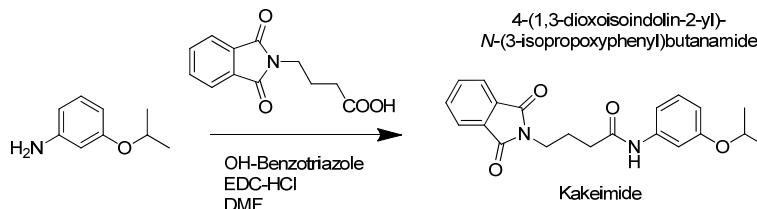

To the solution of 4-(1,3-dioxisoindolin-2-yl) butanoic acid (940 mg, 4.0 mmol) in 8 mL of DMF was added 1-hydroxybenzotriazole monohydrate (545 mg, 4.0 mmol), 3-isopropoxyaniline (610 mg, 4.0 mmol), and EDC-HCl, 1-Ethyl-3-(3-dimethylaminopropyl)carbodiimide monohydrochloride (773 mg, 4.0mmol). The reaction mixture was stirred for 2 h at room temperature. The reaction mixture was poured into water (40 mL) and adjusted to pH 2-3 with 6M HCl. The mixture was extracted with EtOAc (30 mL × 2 times) and the EtOAc layer was then washed with 1 M Na<sub>2</sub>CO<sub>3</sub> aqueous solution (30 mL). The EtOAc layer was dried over anhydrous Na<sub>2</sub>SO<sub>4</sub> and then concentrated *in vacuo*. The resulting powder was recrystallized from *n*-hexane–EtOAc. The product, kakeimide, (4-(1,3-dioxisoindolin-2-yl)-N-(3-isopropoxyphenyl) butanamide) was obtained as a colorless powder (1007 mg, 68% yield). m.p.= 113–115°C; <sup>1</sup>H-NMR (400 MHz, CDCl<sub>3</sub>) δ 8.13 (s, 1H), 7.84 (m, 2H), 7.71 (m, 2H), 7.33 (s, 1H), 7.17 (t, J = 8.2 Hz, 1H), 7.02 (d, J = 8.7 Hz, 1H), 6.62 (d, J = 8.2 Hz, 1H), 4.56-4.50 (m, 1H), 3.81 (t, J = 6.2 Hz, 2H), 2.37 (t, J = 6.9 Hz, 2H), 2.12 (m, 2H), 1.32 (d, J = 6.0 Hz, 6H); <sup>13</sup>C-NMR (100 MHz, CDCl<sub>3</sub>) δ 170.3, 168.9, 158.4, 139.2, 134.1, 131.9, 129.5, 123.3, 111.8, 111.6, 107.3, 69.8, 37.1, 35.0, 25.2, 22.0; MALDI-TOFMS [M+Na]<sup>+</sup> *m/z* calcd. for C<sub>21</sub>H<sub>22</sub>N<sub>2</sub>O<sub>4</sub>Na: 389.14773, found 389.14682.

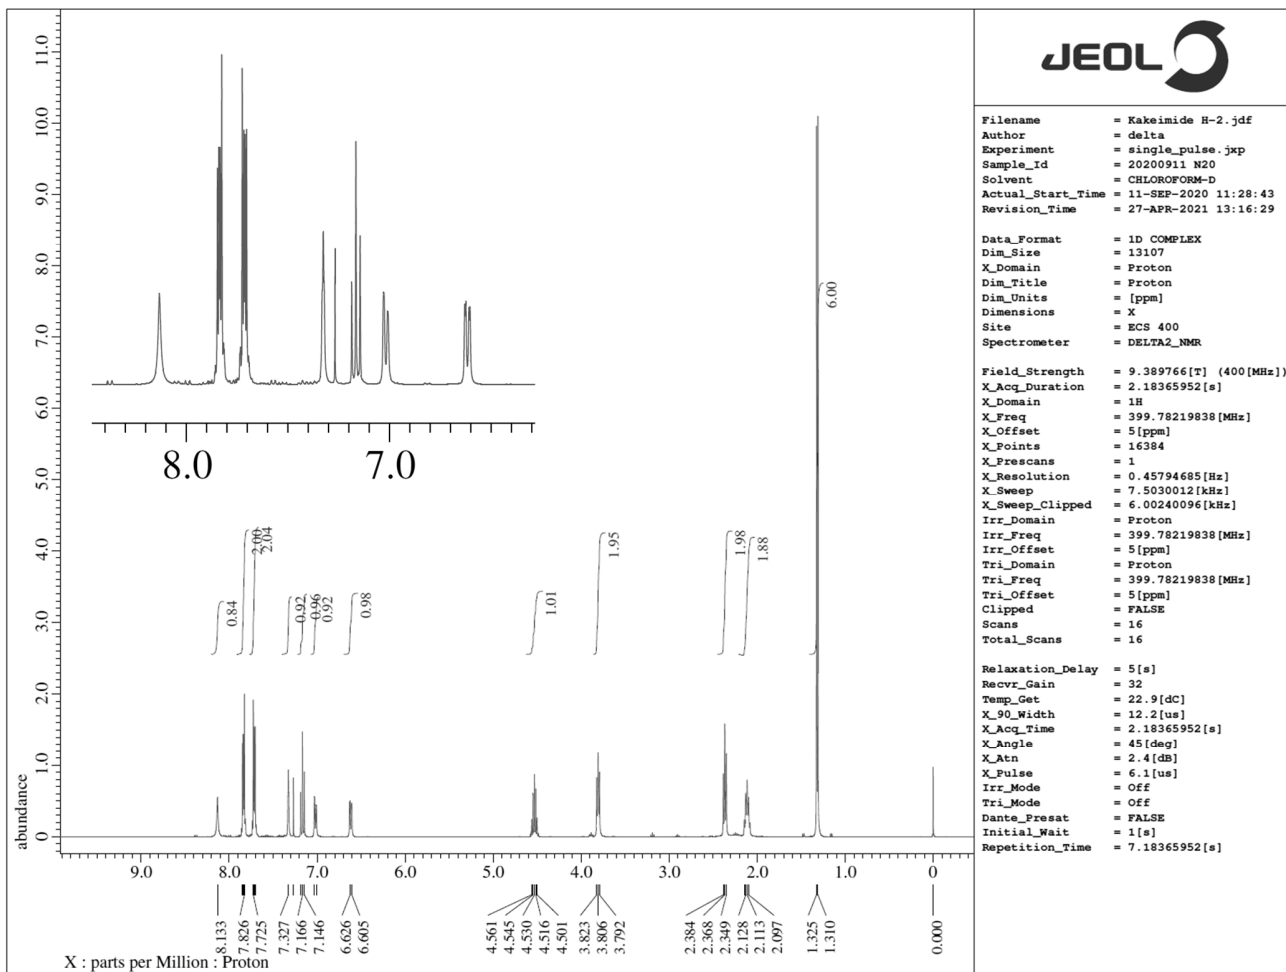

<sup>1</sup>H-NMR-spectrum of kakeimide

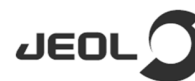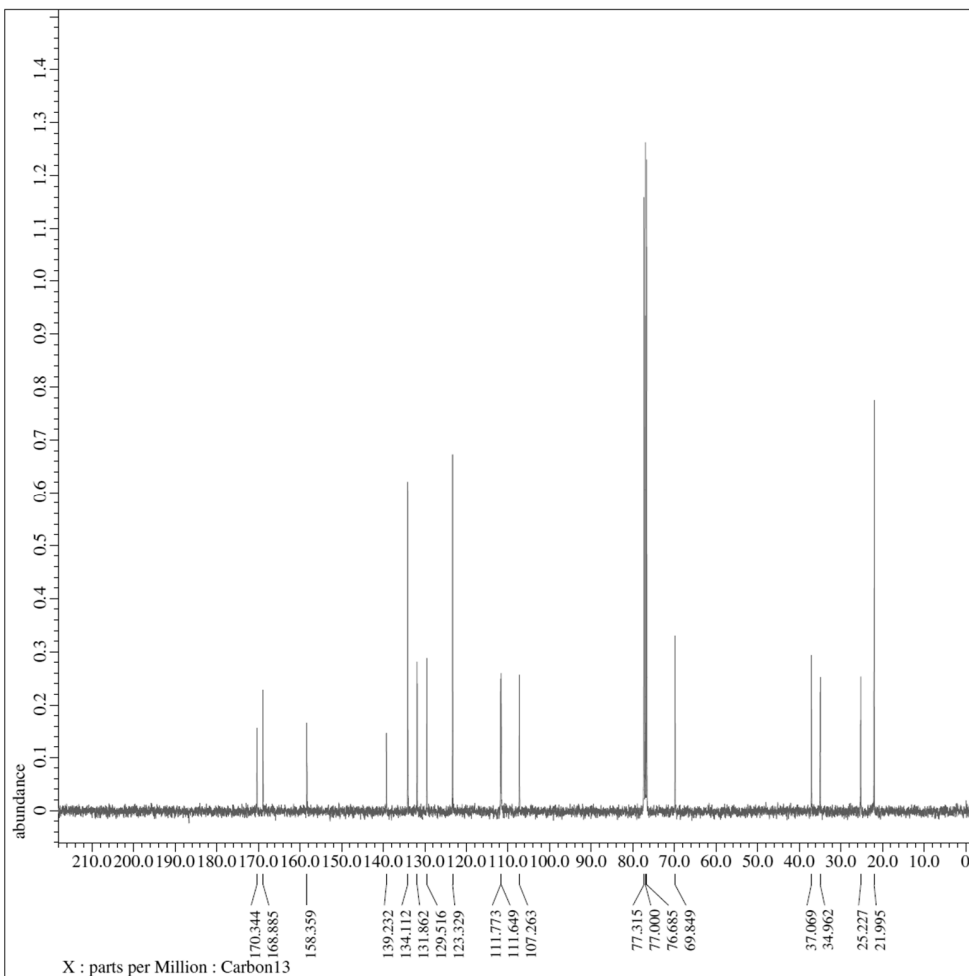

Filename = Kakeimide-C. jdf  
Author = delta  
Experiment = single\_pulse\_dec. jxp  
Sample\_Id = 20200911 N20  
Solvent = CHLOROFORM-D  
Actual\_Start\_Time = 11-SEP-2020 11:31:12  
Revision\_Time = 27-APR-2021 13:14:47

Data\_Format = 1D COMPLEX  
Dim\_Size = 26214  
X\_Domain = Carbon  
Dim\_Title = Carbon13  
Dim\_Units = [ppm]  
Dimensions = X  
Site = ECS 400  
Spectrometer = DELTA2\_NMR

Field\_Strength = 9.389766[T] (400[MHz])  
X\_Acq\_Duration = 1.04333312[s]  
X\_Domain = 13C  
X\_Freq = 100.52530333[MHz]  
X\_Offset = 100[ppm]  
X\_Points = 32768  
X\_Prescans = 4  
X\_Resolution = 0.95846665[Hz]  
X\_Sweep = 31.40703510[kHz]  
X\_Sweep\_Clipped = 25.12562814[kHz]  
Irr\_Domain = Proton  
Irr\_Freq = 399.78219838[MHz]  
Irr\_Offset = 5[ppm]  
Clipped = TRUE  
Scans = 256  
Total\_Scans = 256

Relaxation\_Delay = 2[s]  
Recvr\_Gain = 60  
Temp\_Get = 23.4[dC]  
X\_90\_Width = 10.7[us]  
X\_Acq\_Time = 1.04333312[s]  
X\_Angle = 30[deg]  
X\_Atn = 8.2[db]  
X\_Pulse = 3.56666667[us]  
Irr\_Atn\_Dec = 21.887[db]  
Irr\_Atn\_Noise = 21.887[db]  
Irr\_Noise = WALTZ  
Irr\_Fwidth = 0.115[ms]  
Decoupling = TRUE  
Initial\_Wait = 1[s]  
Noe = TRUE  
Noe\_Time = 2[s]  
Repetition\_Time = 3.04333312[s]

<sup>13</sup>C-NMR-spectrum of kakeimide

## Inhibitory activity of kakeimide on AtGH3.6

Kakeimide was found to be potent inhibitor specific to GH3 enzyme that catalyzed the conjugation of IAA with an amino acid. Kakeimide inhibited GH3 enzymatic activity in competition with IAA. Recombinant GH3.6 protein was purified by TALON metal affinity resin from the culture lysate of *E. coli* BL21 harboring pCold-GH3.6. The enzyme reaction was performed in the following assay condition; GH3.6 protein: 1.5  $\mu\text{g}/\text{mL}$ , 50 mM Tris-HCl (pH 8.6), 3 mM  $\text{MgCl}_2$ , 3 mM ATP, various concentration of IAA, 3 mM *L*-aspartate, 1 mM dithiothreitol, 30  $^\circ\text{C}$ , 30 min <sup>6</sup>. The product, IAA-Asp was analyzed with HPLC system (EXTREMA, JASCO Japan). The  $K_i$  values for AtGH3.6 ( $K_m=55.8 \mu\text{M}$  for IAA) was determined to be 48 nM (Supplementary table 3) according to the methods by Morrison and Cha <sup>7, 8</sup>. The detailed biological activity of kakeimide will be reported in the a separate manuscript.

### $K_i$ values of GH3 inhibitor, kakeimide on AtGH3.6

| IAA ( $\mu\text{M}$ )       | $K_i^{\text{apparent}}$ | $K_i$ |
|-----------------------------|-------------------------|-------|
| 70 $\mu\text{M}$            | 111 nM                  | 49 nM |
| 110 $\mu\text{M}$           | 143 nM                  | 48 nM |
| 250 $\mu\text{M}$           | 268 nM                  | 49 nM |
| 1000 $\mu\text{M}$          | 886 nM                  | 47 nM |
| Average $K_i=48 \text{ nM}$ |                         |       |

$$K_i = \frac{K_i^{\text{apparent}}}{\left(1 + \frac{[\text{IAA}]}{K_m}\right)}$$

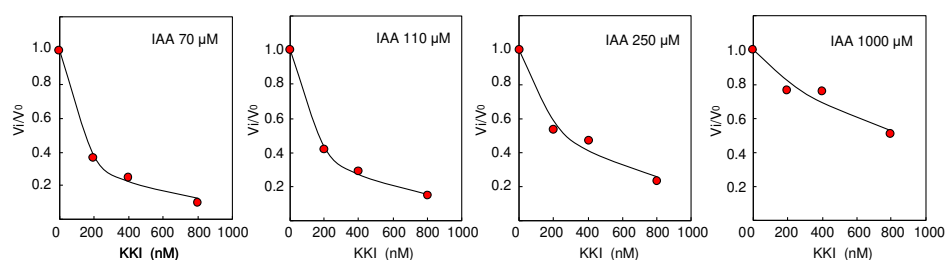

The  $K_i$  values of kakeimide on AtGH3.6 ( $K_m=55.8 \mu\text{M}$  for IAA) was calculated from  $K_i^{\text{apparent}}$  at different concentration of IAA according to the methods by Morrison and Cha <sup>7, 8</sup>.  $K_i^{\text{apparent}}$  values were elevated in proportion to the concentration of IAA, indicating the inhibitory activity of kakeimide is competitive to IAA.

### Synthesis of IAA metabolites.

The [phenyl- $^{13}\text{C}_6$ ]oxIAA, IAA-[ $^{13}\text{C}_4$ ,  $^{15}\text{N}$ ]Asp, IAA-[ $^{13}\text{C}_5$ ,  $^{15}\text{N}$ ]Glu, were previously synthesized <sup>9, 10 11</sup>. [2,2- $^2\text{H}_2$ ] (indol-3-ylacetyl)- $\beta$ -D-glucoside (2,2- $^2\text{H}_2$ -IAA-glucoside) was synthesized as described previously <sup>12</sup>. [2,2- $^2\text{H}_2$ ]IAA-Ala and [2,2- $^2\text{H}_2$ ]IAA-Leu were synthesized by the coupling of [2,2- $^2\text{H}_2$ ]IAA with *L*-alanine methyl ester hydrochloride and *L*-leucine methyl ester hydrochloride, respectively, according to previously described method <sup>9,13</sup>. [2,2- $^2\text{H}_2$ ]DioxIAA, [2,2- $^2\text{H}_2$ ]oxIAA-Asp and [2,2- $^2\text{H}_2$ ]oxIAA-Glu were synthesized from [2,2- $^2\text{H}_2$ ]oxIAA by the following procedure. The isotopic purity of these compounds was confirmed by LC-MS/MS analyses.

## DioxIAA

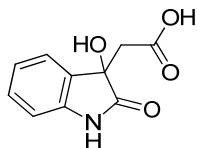

To the solution of oxIAA (38 mg, 0.19 mmol) in 2 mL of THF was added TEMPO, 2,2,6,6-tetramethylpiperidine 1-oxyl (15.4 mg, 0.098 mmol). The reaction mixture was then stirred for 48 h at room temperature. The reaction mixture was added to 0.1M HCl (10 mL), and extracted with EtOAc (15 mL  $\times$  3). The organic layer was washed with brine, and then dried over Na<sub>2</sub>SO<sub>4</sub>. The residue was purified by a silica gel column chromatography (CHCl<sub>3</sub>:acetone=6:4, 0.2% AcOH) to give dioxIAA, 2-(3-hydroxy-2-oxoindolin-3-yl)acetic acid, (19 mg, 46% yield) as a yellowish solid. <sup>1</sup>H-NMR (400 MHz, -D<sub>6</sub>):  $\delta$  9.49 (s, 1H), 7.43 (d, J = 7.3 Hz, 1H), 7.26 (td, J = 7.7, 1.1 Hz, 1H), 7.02-6.98 (m, 1H), 6.90 (d, J = 7.8 Hz, 1H), 3.10 (s, 2H,  $\alpha$  <sup>2</sup>H<sub>2</sub> position); <sup>13</sup>C-NMR (100 MHz, acetone-D<sub>6</sub>):  $\delta$  175.6, 169.6, 144.7, 130.9, 128.1, 125.6, 122.5, 110.6, 84.3, 38.3; ESI-MS [M+H]<sup>+</sup> *m/z* 208.

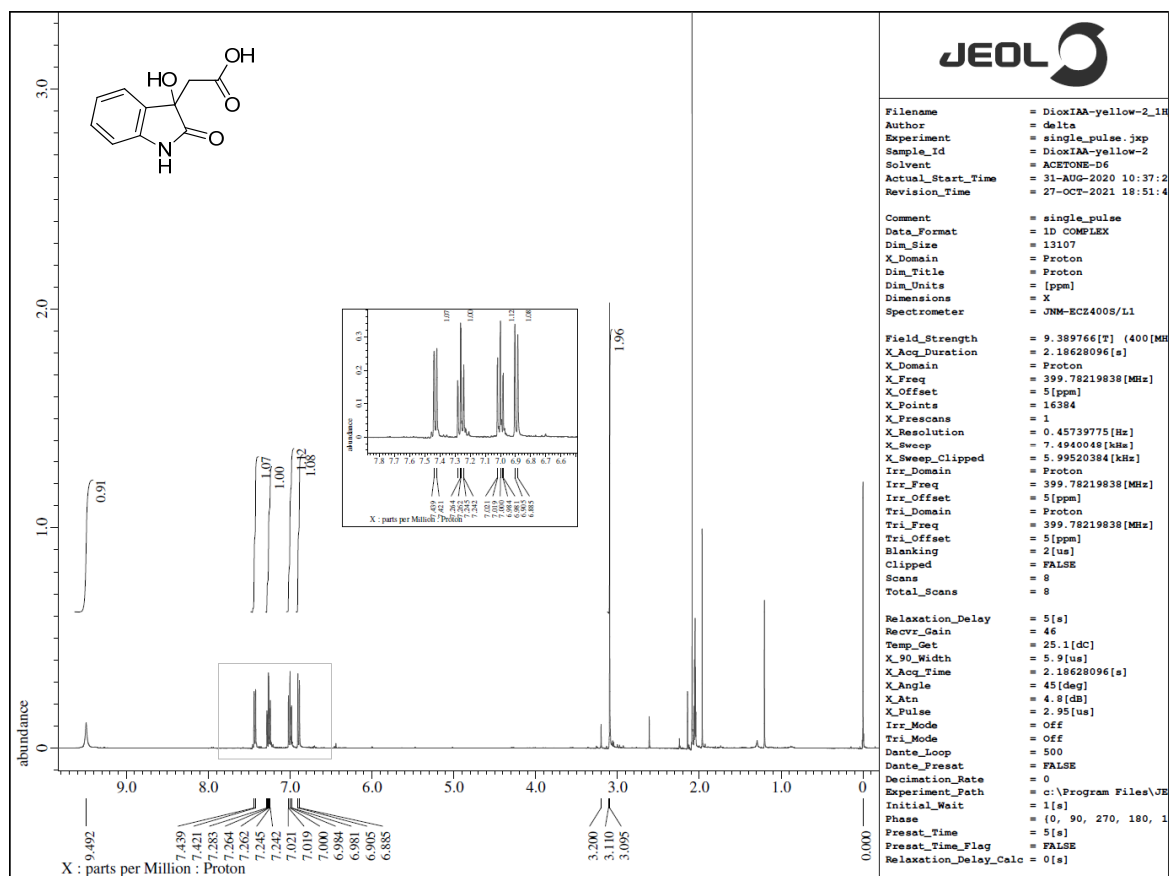

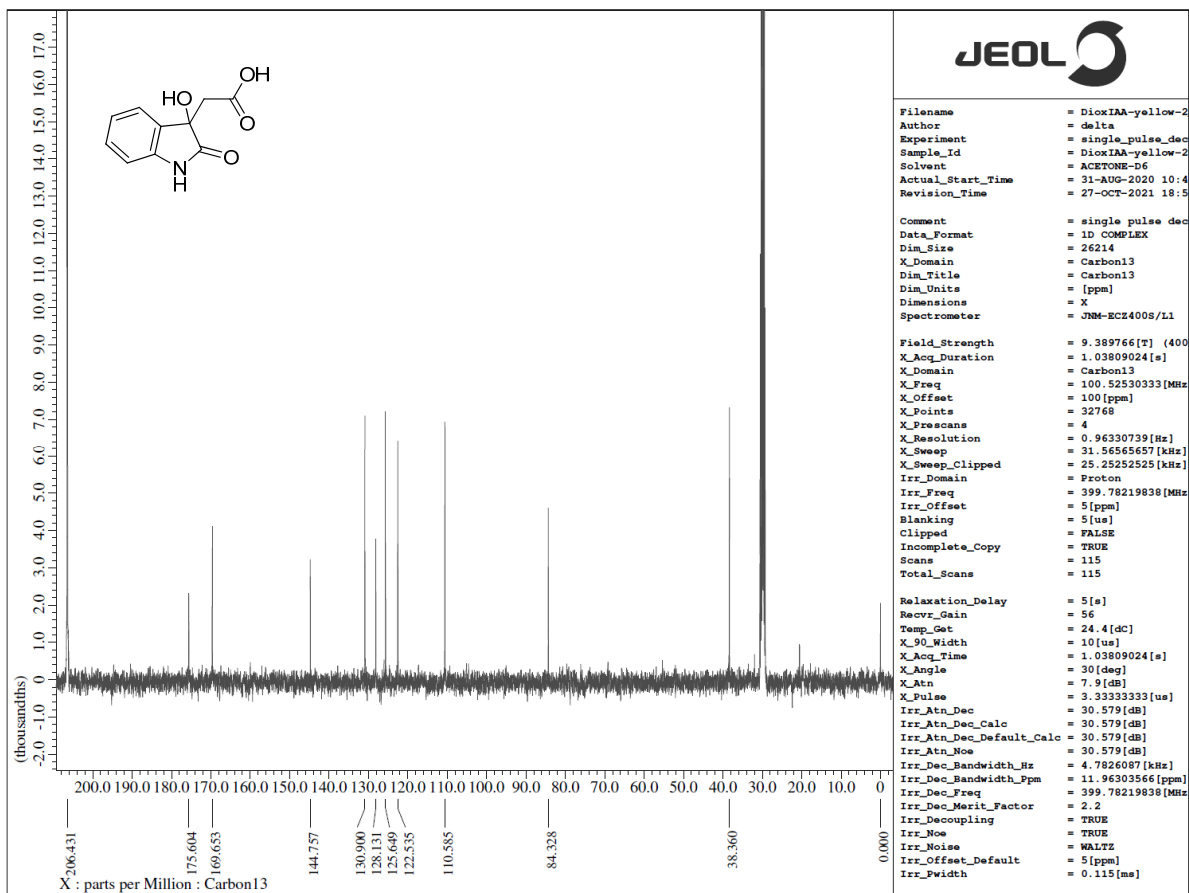

### oxIAA-*L*-Ala *tert*-butyl ester.

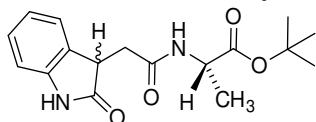

To the solution of oxIAA (200 mg, 1.00 mmol), *L*-alanine *tert*-butyl ester hydrochloride (229 mg, 1.00 mmol) and 1-hydroxybenzotriazole monohydrate (170 mg, 1.30 mmol) in 5 mL of DMF was added EDC-HCl (15.4 mg, 0.098 mmol) and 4-dimethylaminopyridine (DMAP, 153 mg, 1.30 mmol). The reaction mixture was then stirred for 15 h at room temperature. The reaction mixture was added to water (50 mL) and acidified to pH 3.0, and extracted with EtOAc (50 mL  $\times$  3). EtOAc layer was then washed with aqueous 0.25M Na<sub>2</sub>CO<sub>3</sub> solution (30 mL). The organic layer was washed with brine, and then dried over Na<sub>2</sub>SO<sub>4</sub>. The residue was purified by a silica gel column chromatography (hexane:acetone=3:2) to give a diastereomeric mixture (5 : 4) of oxIAA-*L*-Ala *tert*-butyl ester at C-3 position (247 mg, 74 % yield) as a pale yellow solid. <sup>1</sup>H-NMR (400 MHz, CDCl<sub>3</sub>)  $\delta$  8.60 (s, 1H), 8.53 (s, 1H), 7.24-7.16 (m, 4H), 6.99 (q, J = 7.3 Hz, 2H), 6.88 (t, J = 7.1 Hz, 2H), 6.83 (d, J = 7.1 Hz, 1H), 6.77 (d, J = 7.1 Hz, 1H), 4.52-4.47 (m, 2H), 3.93-3.89 (m, 2H), 2.98 (dd, J = 15.6, 5.5 Hz, 1H), 2.92 (dd, J = 15.6, 5.5 Hz, 1H), 2.64 (d, J = 7.8 Hz, 1H), 2.60 (d, J = 7.8 Hz, 1H), 1.48 (s, 9H), 1.46 (s, 9H), 1.39 (d, J = 6.9 Hz, 3H), 1.36 (d, J = 6.9 Hz, 3H). The signal integration was adjusted to 1H from each diastereomer; <sup>13</sup>C-NMR (100 MHz, CDCl<sub>3</sub>)  $\delta$  179.8, 172.6, 172.4, 169.6, 169.5, 141.3, 129.1, 128.3, 124.7, 124.6, 122.6, 109.8, 82.2, 49.0, 42.6, 37.0, 37.0, 28.0, 18.6; MALDI-TOFMS [M+Na]<sup>+</sup> *m/z* 341.15.

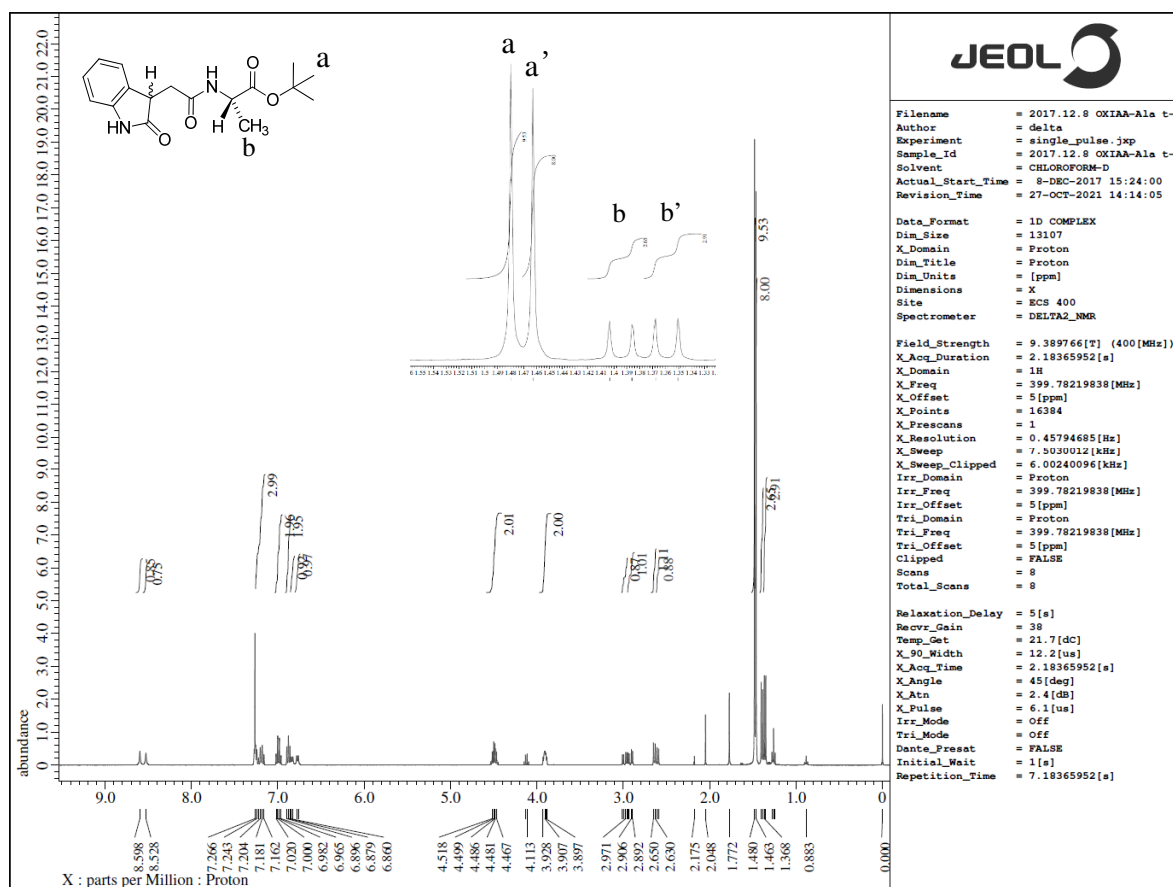

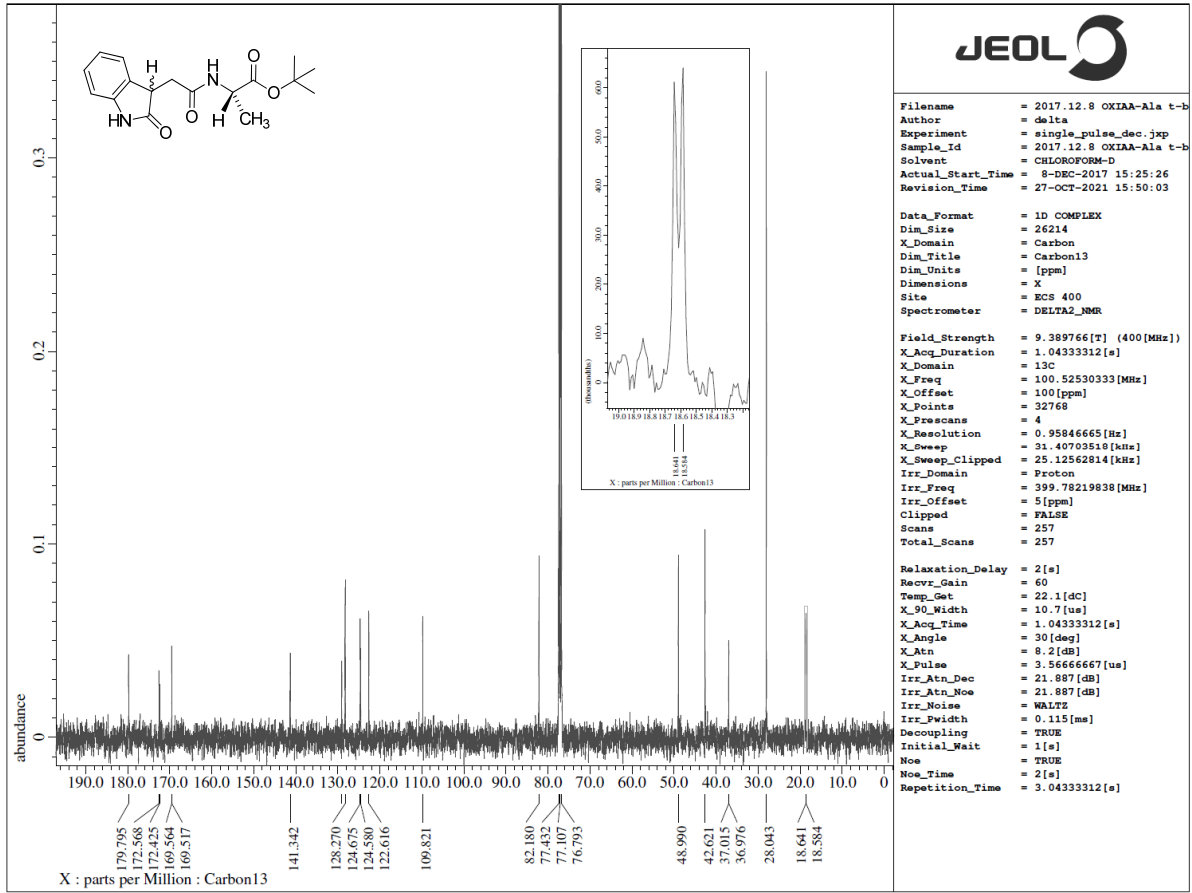



## oxIAA-L-Ala

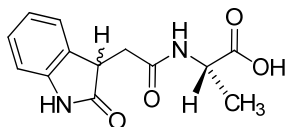

Trifluoroacetic acid (1.5 mL) and triisopropylsilane (0.04 mL) were added to oxIAA-L-Ala *tert*-butyl ester (200 mg, 0.60 mmol) in a screw capped glass vial. The reaction mixture was then stirred for 1 h at room temperature. The reaction mixture was dropped into water (30 mL) and extracted with EtOAc (50 mL  $\times$  3). The organic layer was washed with brine, and then dried over Na<sub>2</sub>SO<sub>4</sub>. The residue was purified by a silica gel column chromatography (CHCl<sub>3</sub>:MeOH=9:1, 0.5% AcOH) to give oxIAA-L-Ala (90 mg, 55% yield) as a pale yellow solid. OxIAA-Ala was obtained as a diastereomeric mixture (10 : 9) at C-3 due to the rapid epimerization at C-3. <sup>1</sup>H-NMR (400 MHz, CD<sub>3</sub>OD)  $\delta$  7.32 (d, J = 7.3 Hz, 1H), 7.19 (m, 3H), 6.96 (dd, J = 8.0, 7.1 Hz, 2H), 6.88 (d, J = 7.8 Hz, 1H), 6.86 (d, J = 7.8 Hz, 1H), 4.40 (m, 2H), 3.84-3.80 (m, 2H), 2.98 (dd, J = 15.3, 4.4 Hz, 1H), 2.92 (dd, J = 15.1, 4.6 Hz, 1H), 2.61-2.56 (m, 1H), 2.55-2.50 (m, 1H), 1.39 (d, J = 7.3 Hz, 3H), 1.35 (d, J = 7.3 Hz, 3H). The signal integration was adjusted to 1H from each diastereomer; <sup>13</sup>C-NMR (100 MHz, CD<sub>3</sub>OD)  $\delta$  180.2, 174.6, 171.2, 142.1, 129.3, 129.2, 127.9, 127.8, 124.3, 124.0, 121.9, 109.5, 109.4, 42.8, 42.6, 35.9, 35.7, 16.4, 16.2; ESI-MS [M+H]<sup>+</sup> *m/z* 263.

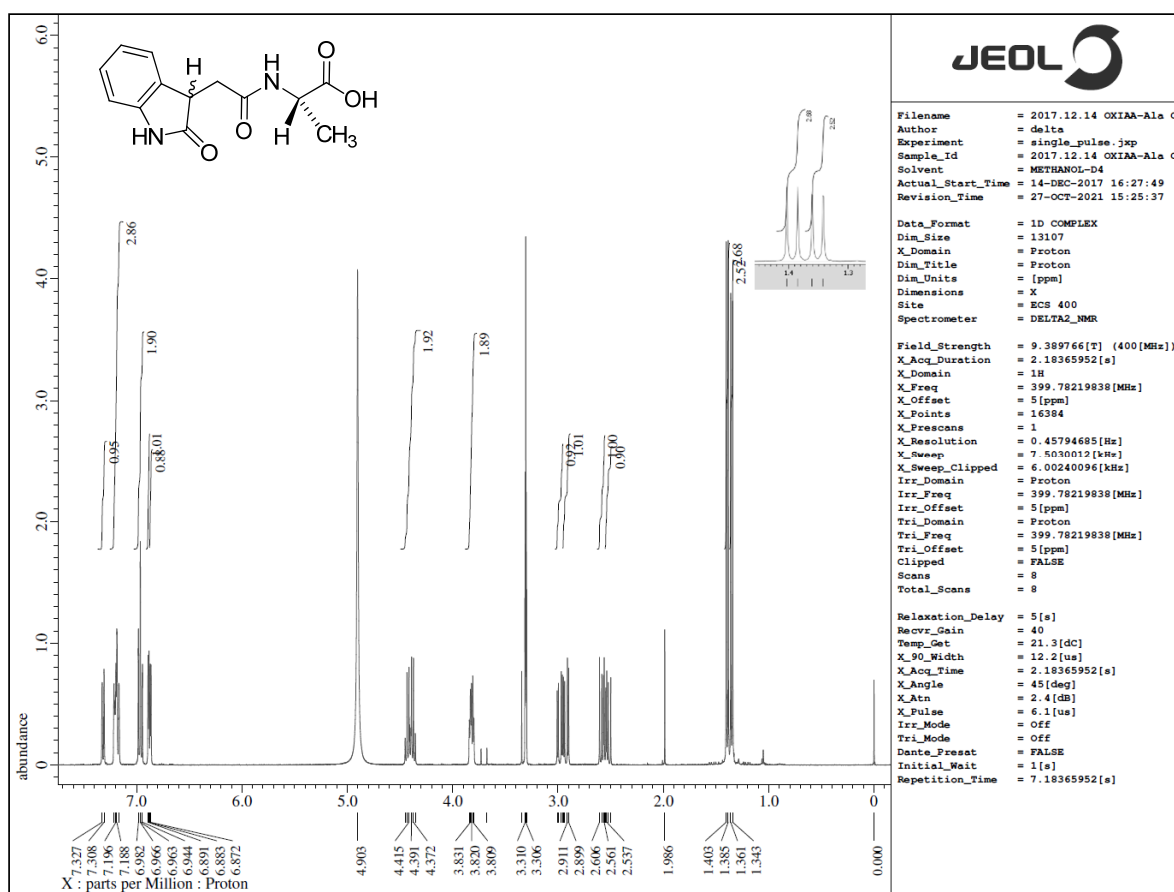

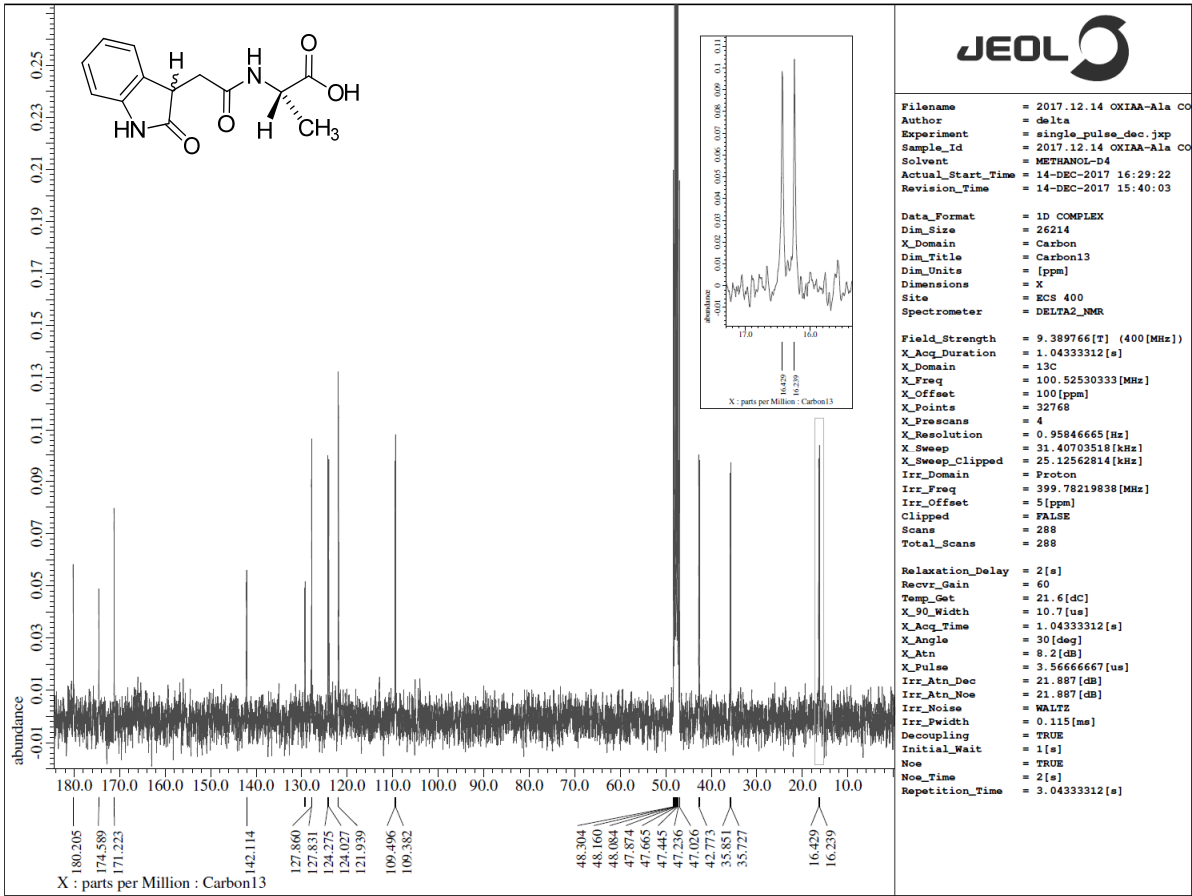

### oxIAA-*L*-Leu *tert*-butyl ester

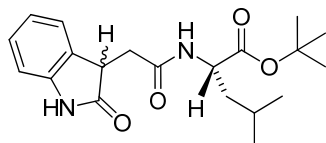

oxIAA-*L*-Leu *tert*-butyl ester was synthesized with the same procedure for oxIAA-*L*-Ala *tert*-butyl ester. oxIAA-*L*-Leu *tert*-butyl ester was obtained as a diastereomeric mixture (10 : 9) of oxIAA-*L*-Leu *tert*-butyl ester at C-3 position (285 mg, 76 % yield) as a pale brownish solid. <sup>1</sup>H-NMR (400 MHz, CDCl<sub>3</sub>) δ 8.44 (s, 1H), 8.36 (s, 1H), 7.26 (s, 2H), 7.23-7.16 (m, 2H), 6.99 (q, J = 7.9 Hz, 2H), 6.87 (t, J = 8.5 Hz, 2H), 6.72 (d, J = 8.2 Hz, 1H), 6.61 (d, J = 8.2 Hz, 1H), 4.55-4.52 (m, 2H), 3.91 (m, 2H), 3.02-2.90 (m, 2H), 2.66-2.59 (m, 2H), 1.70-1.51 (m, 8H), 1.48 (s, 9H), 1.46 (s, 9H), 0.96-0.90 (m, 12H). The signal integration was adjusted to 1H from each diastereomer; <sup>13</sup>C-NMR (100 MHz, CDCl<sub>3</sub>) δ 179.8, 179.7, 172.5, 169.8, 141.3, 141.2, 129.0, 128.3, 124.7, 122.7, 122.6, 109.8, 82.1, 51.7, 42.7, 41.9, 37.1, 28.1, 25.0, 22.9, 22.2; MALD-TOFMS [M+Na]<sup>+</sup> *m/z* 383.183

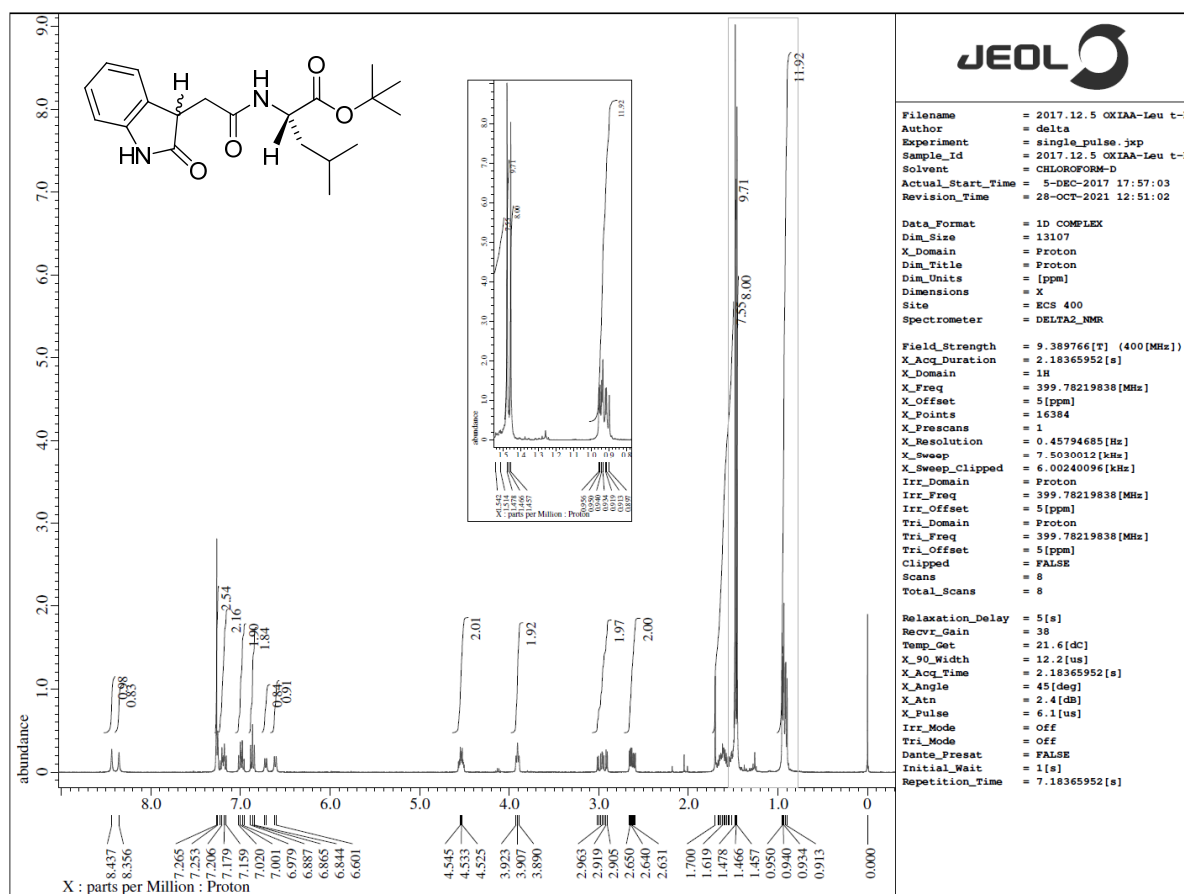

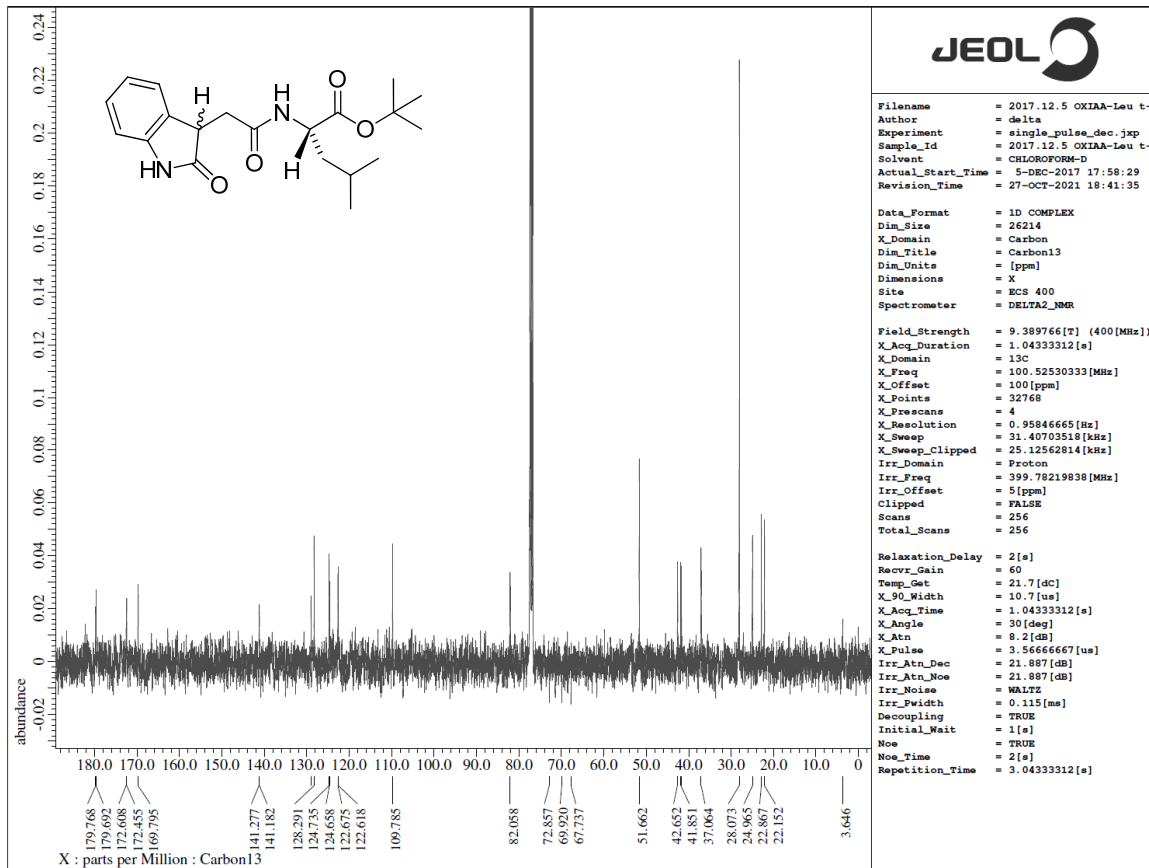

### oxIAA-L-Leu

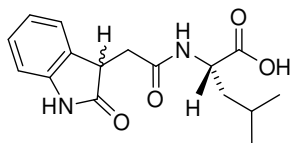

oxIAA-L-Leu was synthesized with the same procedure for oxIAA-L-Ala. oxIAA-L-Leu was obtained as a diastereomeric mixture (10 : 9) of oxIAA-L-Leu at C-3 position (139 mg, 82 % yield) as a pale yellow solid. <sup>1</sup>H-NMR (400 MHz, CD<sub>3</sub>OD) δ 7.29 (d, J = 7.3 Hz, 1H), 7.19 (m, 3H), 6.95 (m, 2H), 6.88 (t, J = 7.1 Hz, 2H), 4.49-4.38 (m, 2H), 3.84-3.78 (m, 2H), 3.02-2.92 (m, 2H), 2.64 (q, J = 7.8 Hz, 1H), 2.53 (dd, J = 15.1, 9.6 Hz, 1H), 1.74-1.53 (m, 6H), 0.97-0.91 (m, 9H), 0.83-0.75 (d, J = 6.0, 3H). The signal integration was adjusted to 1H from each diastereomer; <sup>13</sup>C-NMR (100 MHz, CD<sub>3</sub>OD) δ 181.6, 181.5, 175.9, 172.9, 172.8, 143.6, 143.5, 130.6, 130.4, 129.3, 129.2, 125.5, 125.3, 123.2, 123.2, 110.9, 110.7, 52.1, 44.2, 44.0, 41.5, 37.3, 37.0, 25.9, 25.9, 23.4, 21.7, 21.6; ESI-MS [M+H]<sup>+</sup> m/z 305.

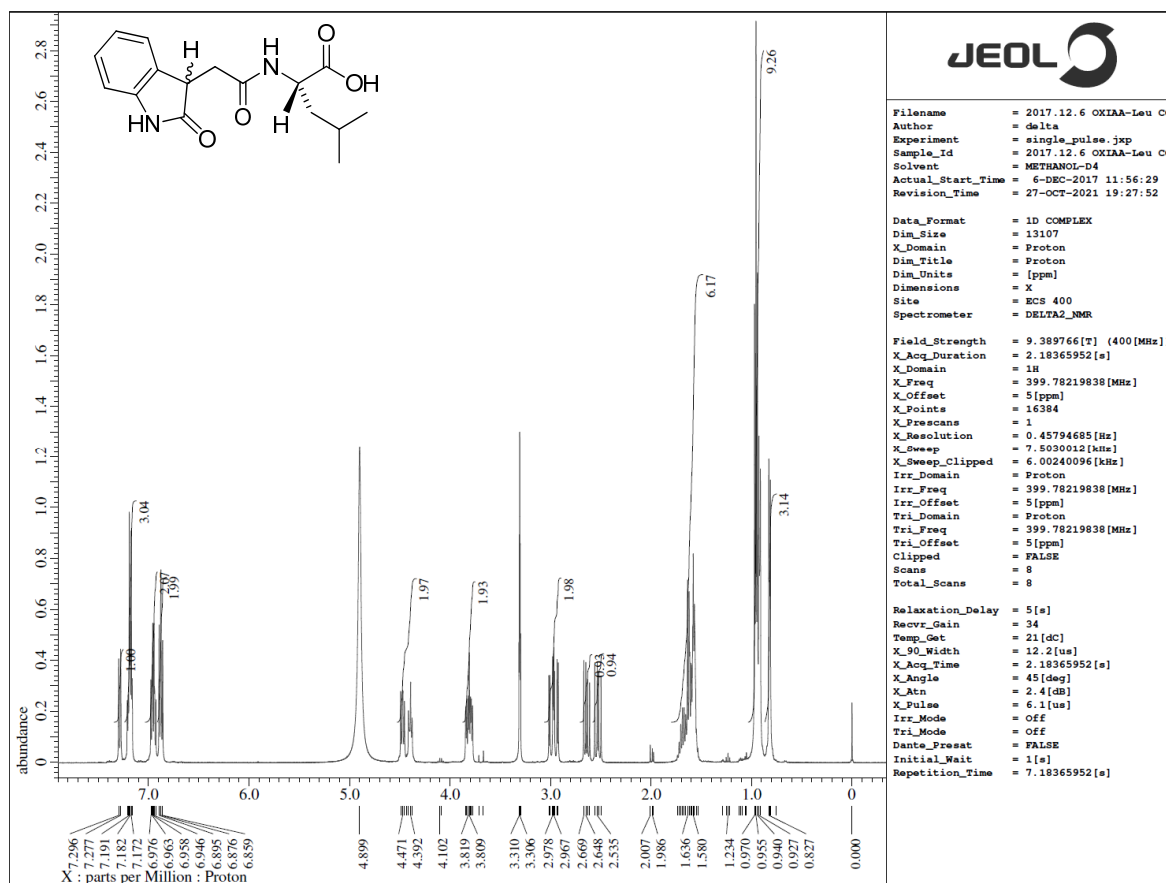

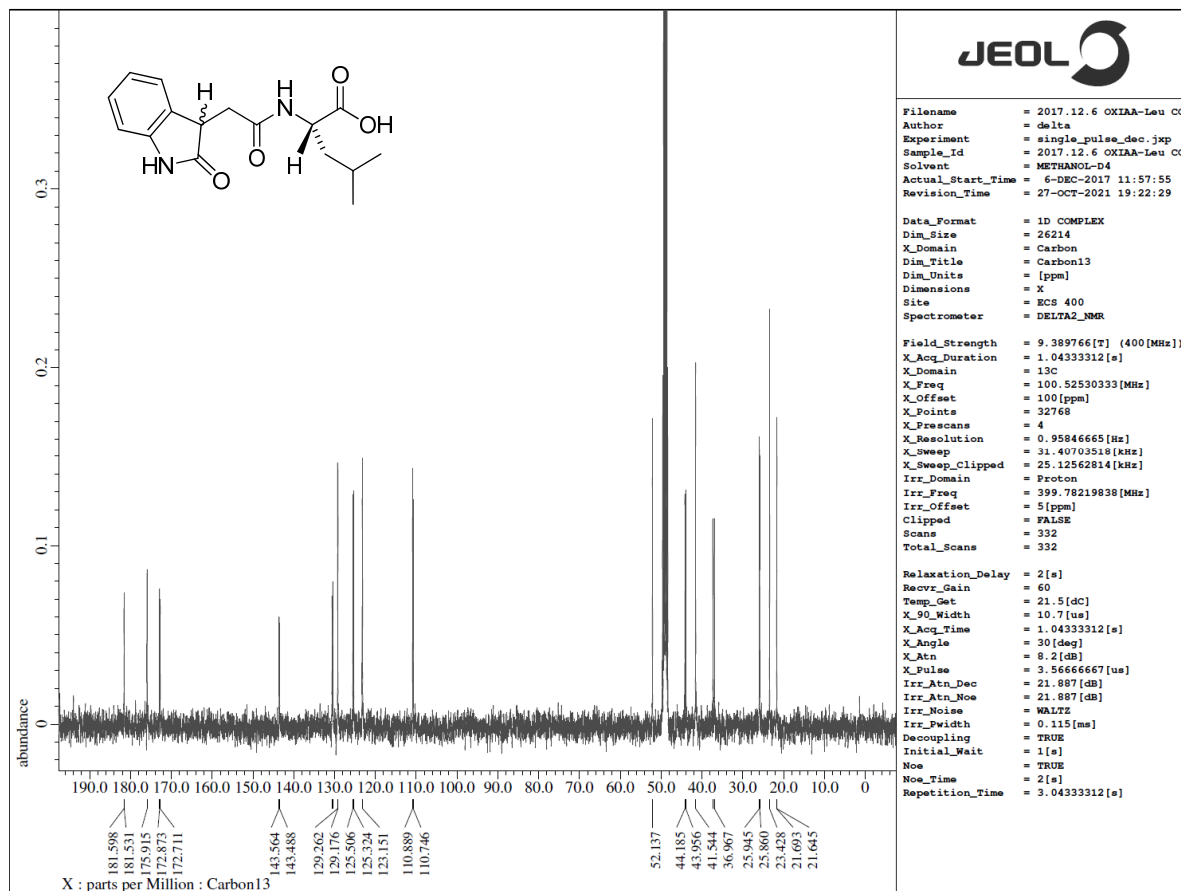

**JEOL**

```

Filename      = 2017.12.6 OXIAA-Leu COO
Author       = delta
Experiment   = single_pulse_dec.jsp
Sample_Id    = 2017.12.6 OXIAA-Leu COO
Solvent      = METHANOL-D4
Actual_Start_Time = 6-DEC-2017 11:57:55
Revision_Time = 27-OCT-2021 19:22:29

Data_Format  = 1D COMPLEX
Dim_Size     = 26214
X_Domain     = Carbon
Dim_Title    = Carbon13
Dim_Units    = [ppm]
Dimensions   = X
Site         = ECS 400
Spectrometer = DELTA2_NMR

Field_Strength = 9.389766[T] (400[MHz])
X_Acq_Duration = 1.04333312[s]
X_Domain      = 13c
X_Freq       = 100.52530333[MHz]
X_Offset     = 100[ppm]
X_Points     = 32768
X_Prescans   = 4
X_Resolution = 0.95846665[Hz]
X_Sweep      = 31.40703518[kHz]
X_Sweep_Clippped = 25.12562814[kHz]
Irr_Domain   = Proton
Irr_Freq     = 399.78219838[MHz]
Irr_Offset   = 5[ppm]
Clipped      = FALSE
Scans        = 332
Total_Scans  = 332

Relaxation_Delay = 2[s]
Recvr_Gain       = 60
Temp_Get         = 21.5[dc]
X_90_Width      = 10.7[us]
X_Acq_Time      = 1.04333312[s]
X_Angle         = 30[deg]
X_Atn           = 8.2[db]
X_Pulse         = 3.56566667[us]
Irr_Atn_Dec     = 21.887[db]
Irr_Atn_Noce   = 21.887[db]
Irr_Noise      = WALTZ
Irr_Pwidth     = 0.115[ms]
Decoupling      = TRUE
Initial_Wait    = 1[s]
Noe              = TRUE
Noe_Time        = 2[s]
Repetition_Time = 3.04333312[s]
  
```

### oxIAA-*L*-Asp *tert*-butyl diester

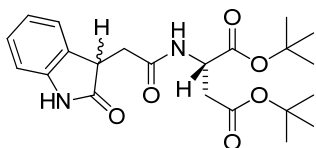

oxIAA-*L*-Asp *tert*-butyl diester was synthesized with the same procedure for oxIAA-*L*-Ala *tert*-butyl ester. oxIAA-*L*-Asp *tert*-butyl diester was obtained as a diastereomeric mixture (10 : 9) of oxIAA-*L*-Asp *tert*-butyl diester at C-3 position (210 mg, 79% yield) as a pale yellow solid. <sup>1</sup>H-NMR (400 MHz, CDCl<sub>3</sub>) δ 8.31 (s, 2H), 7.29-7.17 (m, 4H), 7.00-6.95 (m, 4H), 6.88 (d, J = 7.8 Hz, 2H), 4.72 (m, 2H), 3.91 (m, 2H), 3.06-2.84 (m, 4H), 2.79-2.60 (m, 4H), 1.46 (s, 9H), 1.45 (s, 9H), 1.44 (s, 9H), 1.43 (s, 9H). The signal integration was adjusted to 1H from each diastereomer ; <sup>13</sup>C-NMR (100 MHz, CDCl<sub>3</sub>) δ 179.5, 170.5, 170.3, 169.8, 141.3, 129.1, 128.2, 124.8, 124.6, 122.6, 122.6, 109.8, 82.5, 82.4, 81.7, 49.4, 42.5, 37.5, 36.9, 36.8, 28.1, 28.0; ESI-MS [M+H]<sup>+</sup> *m/z* 419.

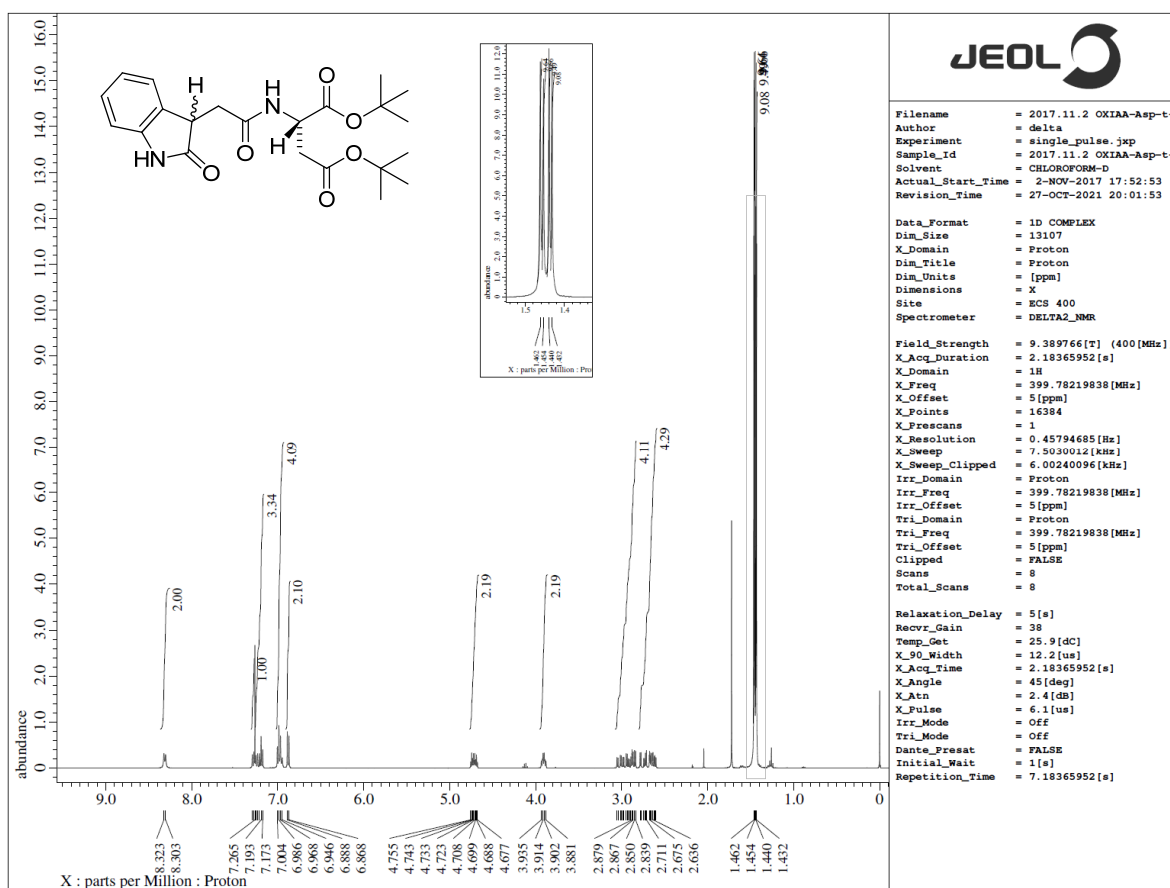

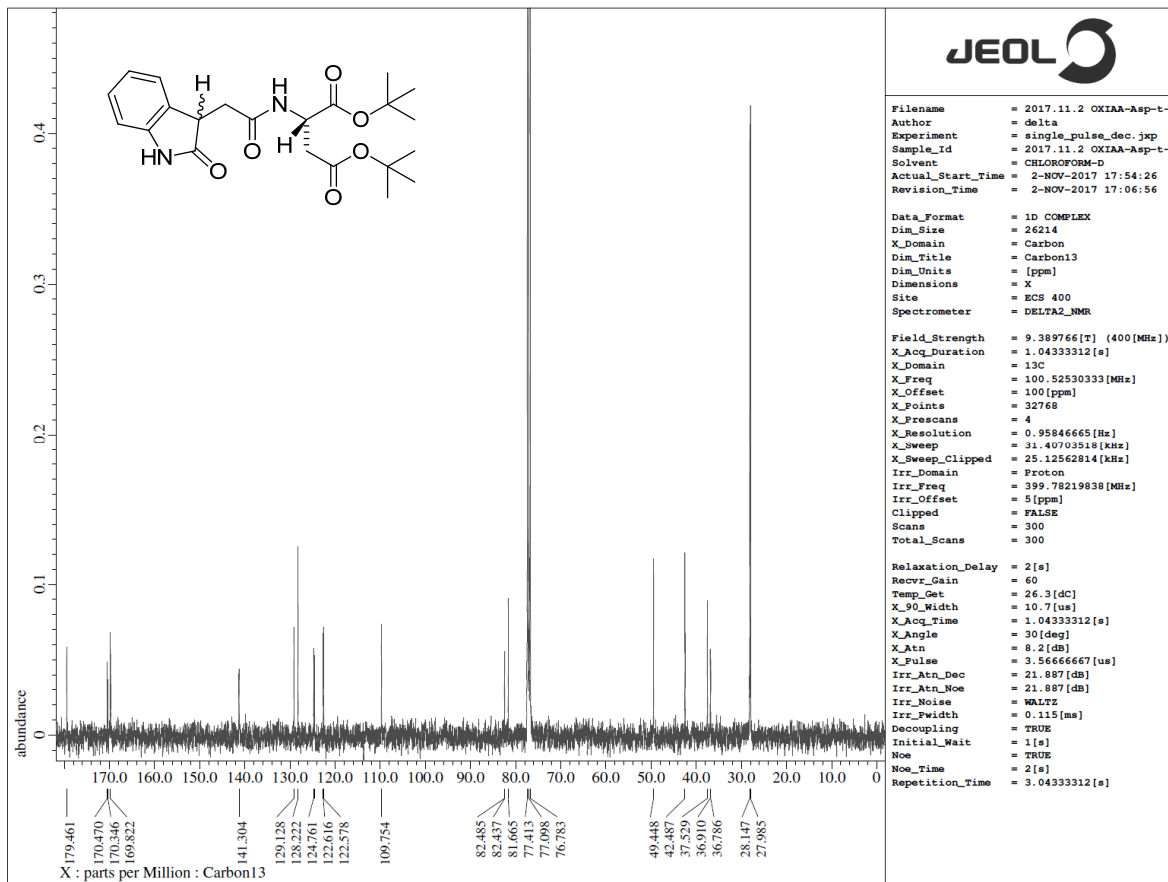



## oxIAA-*L*-Asp

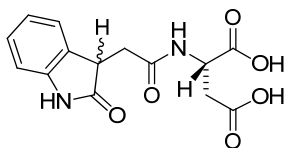

oxIAA-*L*-Asp was synthesized with same procedure for oxIAA-*L*-Ala. oxIAA-*L*-Asp was obtained as a diastereomeric mixture (10 : 9) of oxIAA-*L*-Asp at C-3 position (78 mg, 54% yield) as a pale yellow solid. <sup>1</sup>H-NMR (400 MHz, CD<sub>3</sub>OD) δ 7.30 (d, J = 7.8 Hz, 1H), 7.23 (d, J = 7.8 Hz, 1H), 7.18 (t, J = 7.8 Hz, 2H), 6.98-6.94 (m, 2H), 6.88 (d, J = 7.8 Hz, 2H), 4.76-4.76 (m, 2H), 3.84-3.81 (m, 2H), 2.99-2.75 (m, 6H), 2.62-2.56 (m, 2H). The signal integration was adjusted to 1H from each diastereomer; <sup>13</sup>C-NMR (100 MHz, CD<sub>3</sub>OD) δ 181.6, 174.2, 174.1, 172.7, 143.4, 130.6, 130.5, 129.2, 125.6, 125.5, 123.4, 123.3, 110.8, 110.8, 44.1, 44.0, 37.1; ESI-MS [M+H]<sup>+</sup> *m/z* 307.

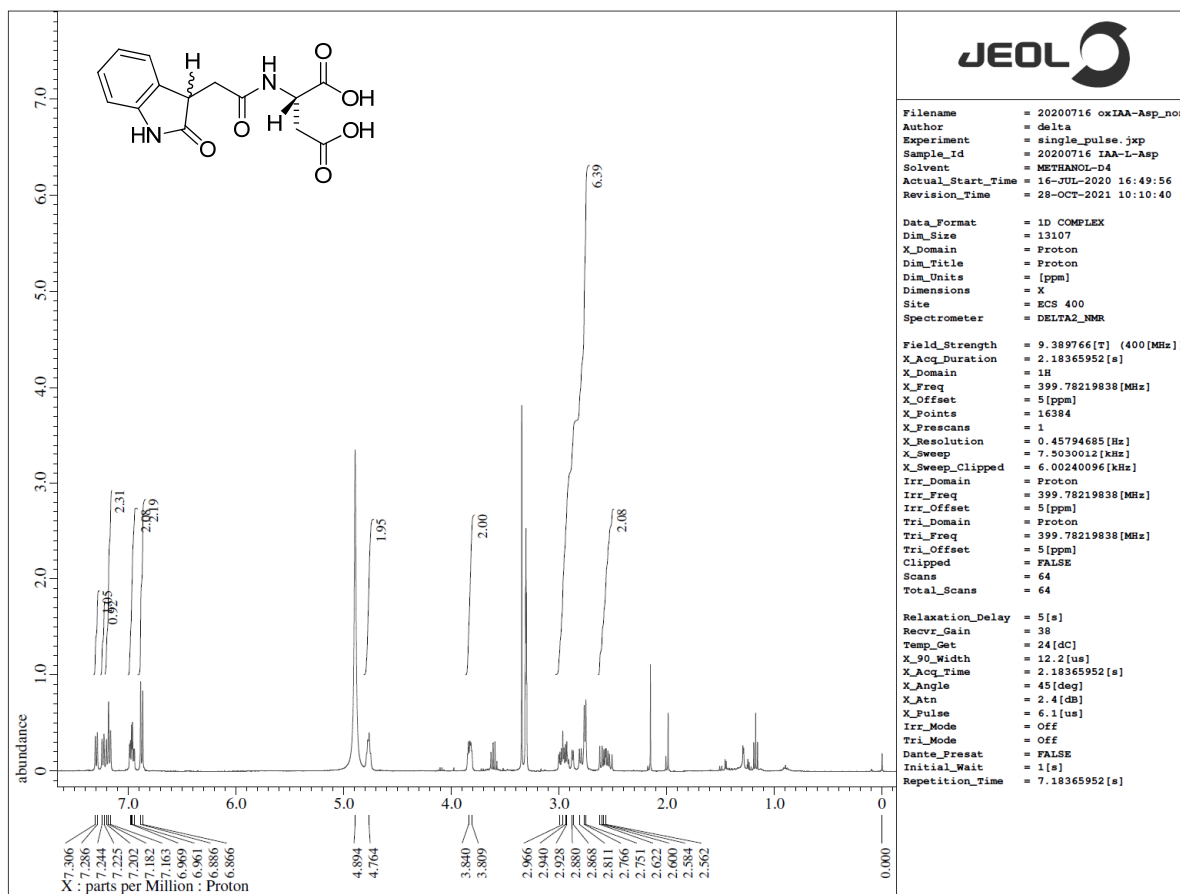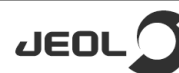

```

Filename      = 20200716 oxIAA-Asp_non
Author       = delta
Experiment   = single_pulse.jsp
Sample_id    = 20200716 IAA-L-Asp
Solvent      = METHANOL-D4
Actual_Start_Time = 16-JUL-2020 16:49:56
Revision_Time  = 28-OCT-2021 10:10:40

Data_Format  = 1D COMPLEX
Dim_Size     = 13107
X_Domain     = Proton
Dim_Title    = Proton
Dim_Units    = [ppm]
Dimensions   = X
Site         = ECS 400
Spectrometer = DELTA2_NMR

Field_Strength = 9.389766[T] (400[MHz])
X_Acq_Duration = 2.18365952[s]
X_Domain       = 1H
X_Freq         = 399.78219838[MHz]
X_Offset       = 5[ppm]
X_Points       = 16384
X_Prescans    = 1
X_Resolution   = 0.45794685[Hz]
X_Sweep        = 7.5030012[kHz]
X_Sweep_Clipped = 6.00240096[kHz]
Irr_Domain     = Proton
Irr_Freq       = 399.78219838[MHz]
Irr_Offset     = 5[ppm]
Tri_Domain     = Proton
Tri_Freq       = 399.78219838[MHz]
Tri_Offset     = 5[ppm]
Clipped        = FALSE
Scans          = 64
Total_Scans    = 64

Relaxation_Delay = 5[s]
Recvr_Gain       = 38
Temp_Get         = 24[dc]
X_90_Width      = 12.2[us]
X_Acq_Time       = 2.18365952[s]
X_Angle          = 45[deg]
X_Atn            = 2.4[db]
X_Pulse          = 6.1[us]
Irr_Mode         = OFF
Tri_Mode         = OFF
Dante_Preset    = FALSE
Initial_Wait     = 1[s]
Repetition_Time = 7.18365952[s]
    
```

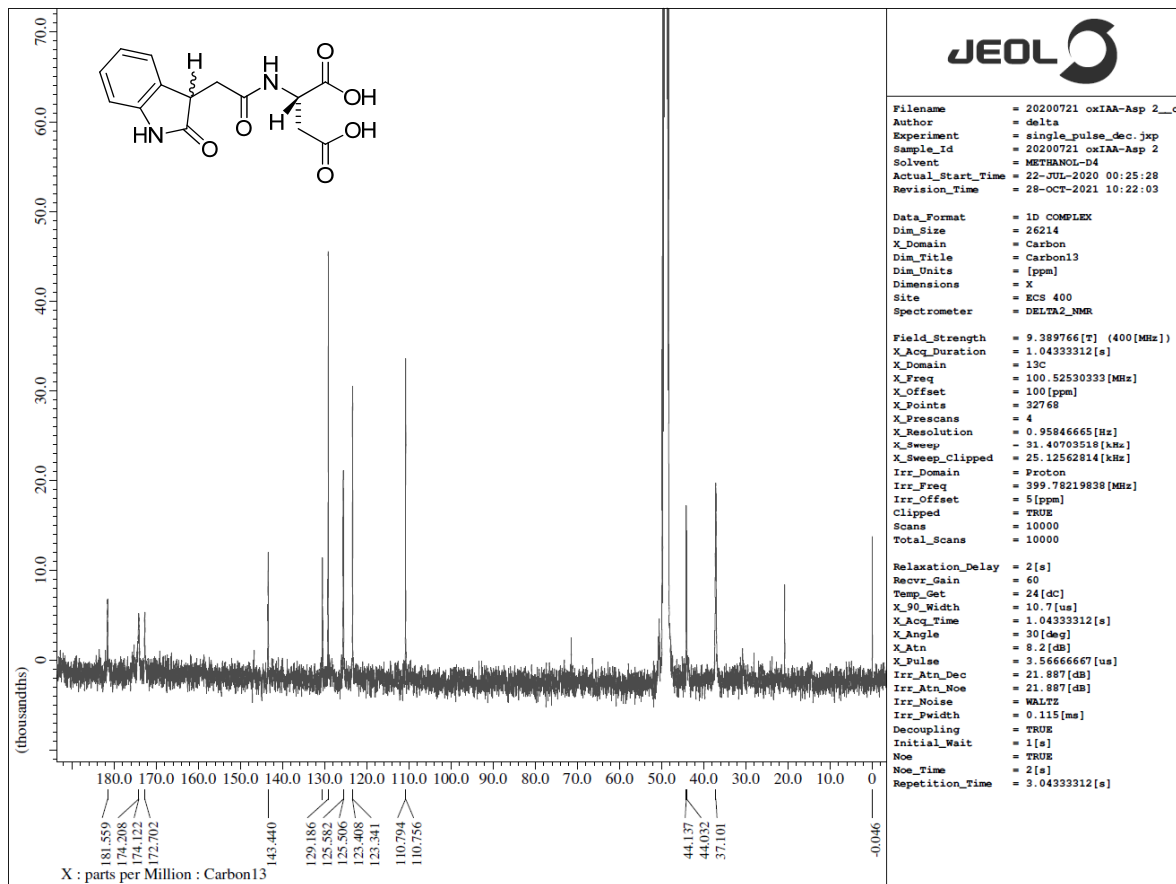

### oxIAA-L-Glu *tert*-butyl diester

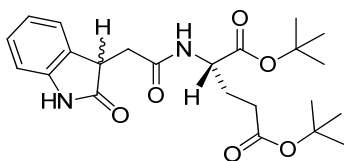

oxIAA-L-Glu *tert*-butyl diester was synthesized with the same procedure for oxIAA-L-Ala *tert*-butyl ester. oxIAA-L-Glu *tert*-butyl diester was obtained as a diastereomeric mixture (1 : 1) of oxIAA-L-Glu *tert*-butyl diester at C-3 position (373 mg, 82% yield) as a pale yellow solid. <sup>1</sup>H-NMR (400 MHz, CDCl<sub>3</sub>) δ 8.53 (s, 1H), 8.49 (s, 1H), 7.28-7.27 (m, 2H), 7.19 (q, J = 7.2 Hz, 2H), 7.00 (q, J = 7.6 Hz, 2H), 6.89-6.86 (m, 4H), 4.53-4.48 (m, 2H), 3.93-3.89 (m, 2H), 3.03-2.92 (m, 2H), 2.66-2.59 (m, 2H), 2.36-2.11 (m, 6H), 1.93-1.89 (m, 2H), 1.48 (s, 9H), 1.47 (s, 9H), 1.44 (s, 18H). The signal integration was adjusted to 1H from each diastereomer; <sup>13</sup>C-NMR (100 MHz, CDCl<sub>3</sub>) δ 179.7, 172.4, 172.3, 171.3, 171.3, 170.0, 169.9, 141.3, 129.1, 128.3, 124.7, 122.7, 122.6, 109.8, 82.5, 82.4, 80.9, 52.6, 52.5, 42.6, 37.0, 31.6, 31.5, 28.2, 28.1, 27.7; ESI-MS [M+H]<sup>+</sup> *m/z* 433.

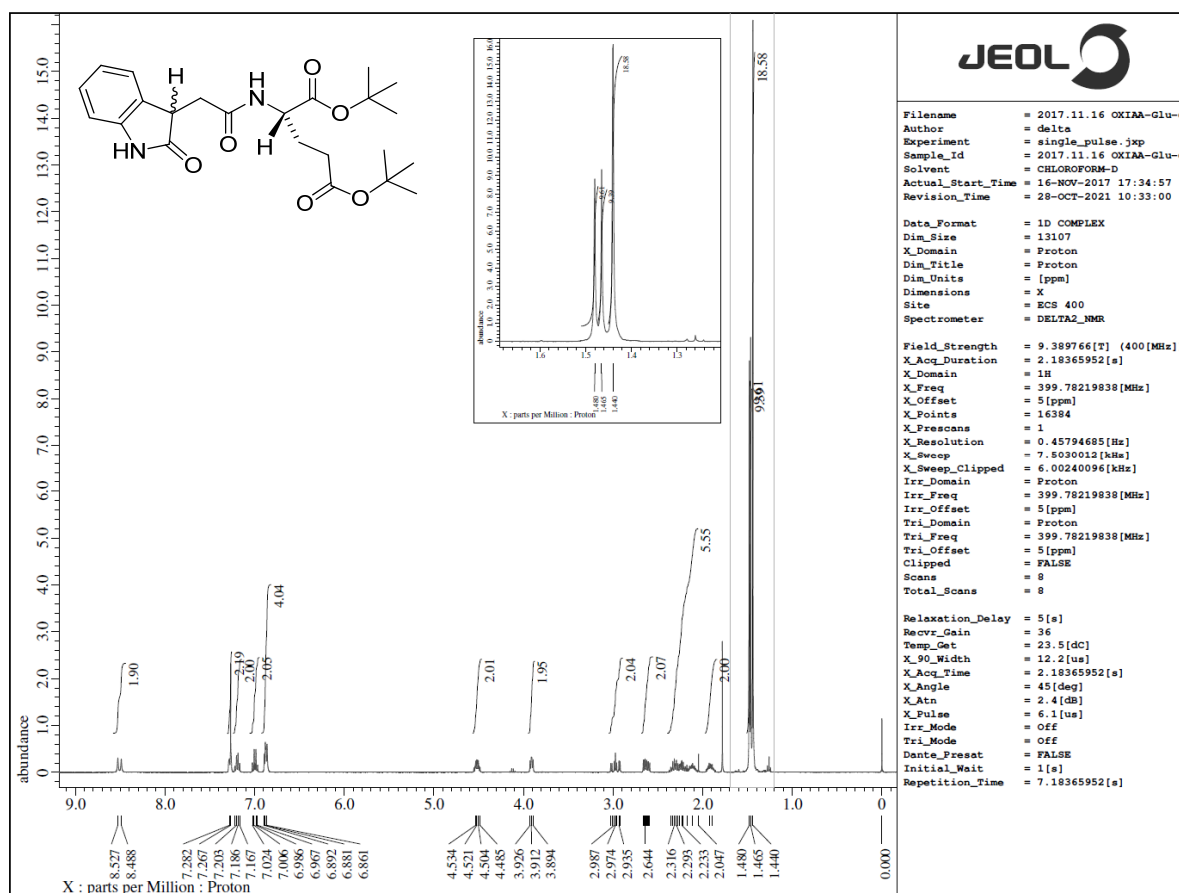

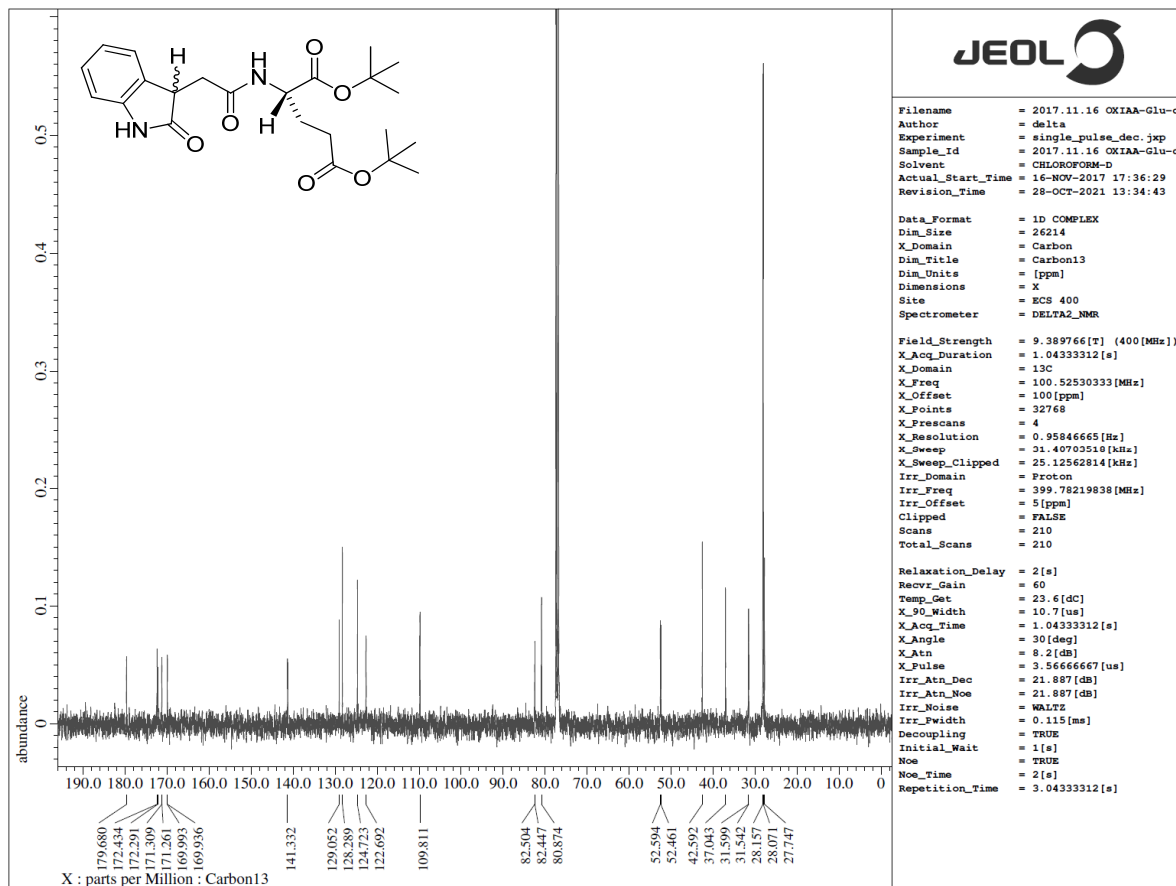

## oxIAA-L-Glu

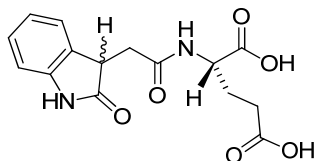

oxIAA-L-Glu was synthesized with the same procedure for oxIAA-L-Ala. oxIAA-L-Glu was obtained as a diastereomeric mixture (1 : 1) of oxIAA-L-Glu at C-3 position (78 mg, 54% yield) as a pale yellow solid.  $^1\text{H-NMR}$  (400 MHz,  $\text{CD}_3\text{OD}$ )  $\delta$  7.33-7.28 (m, 1H), 7.22-7.16 (m, 3H), 6.99-6.95 (m, 2H), 6.88 (q,  $J = 4.0$  Hz, 2H), 4.41-4.38 (m, 1H), 4.34-4.30 (m, 1H), 3.86-3.79 (m, 1H), 2.95 (q,  $J = 7.3$  Hz, 2H), 2.71-2.56 (m, 2H), 2.38-2.26 (m, 4H), 2.22-2.06 (m, 2H), 1.94-1.82 (m, 2H). The signal integration was adjusted to 1H from each diastereomer;  $^{13}\text{C-NMR}$  (100 MHz,  $\text{CD}_3\text{OD}$ )  $\delta$  180.4, 180.3, 174.6, 171.4, 171.3, 142.2, 142.1, 129.3, 129.1, 127.9, 124.1, 124.1, 122.1, 122.0, 109.6, 109.5, 53.5, 36.1, 35.8, 30.7, 30.7, 27.4, 27.4; ESI-MS  $[\text{M}+\text{H}]^+ m/z$  321.

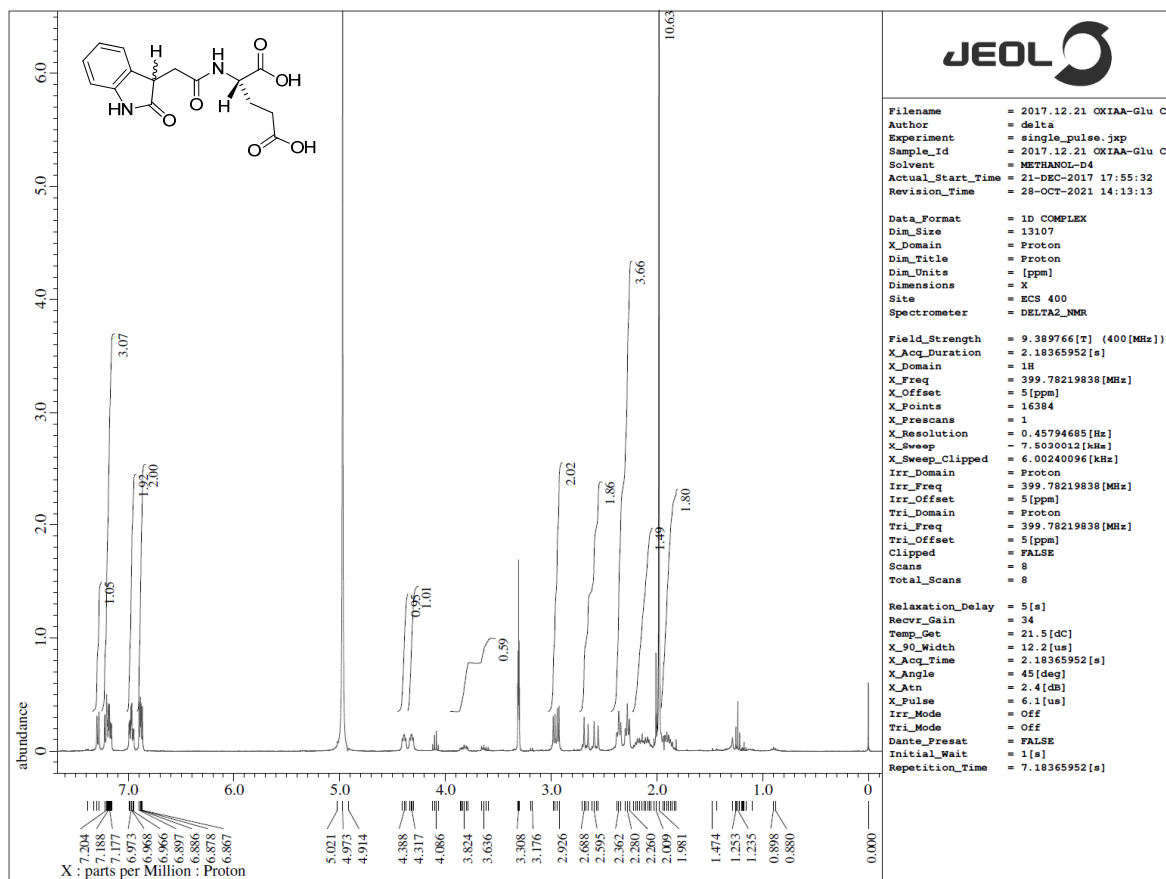

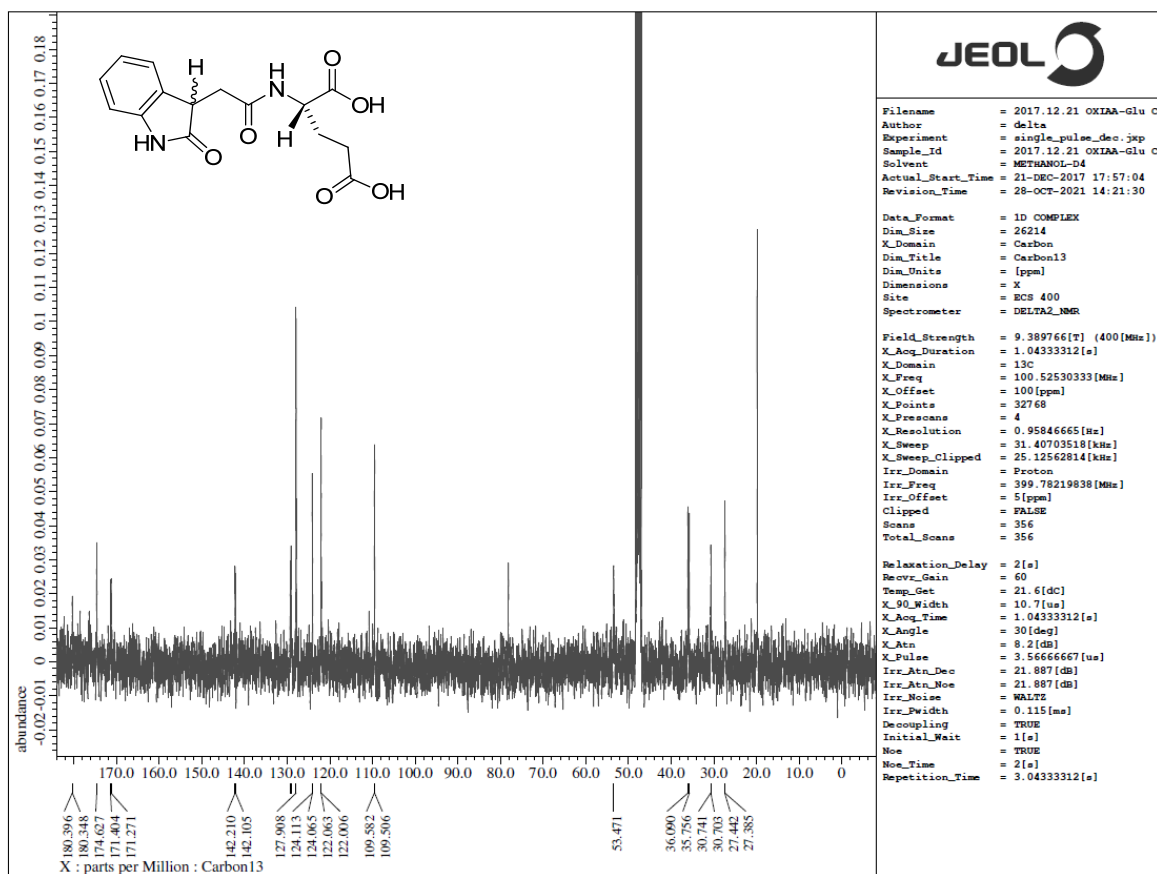

## Derivatives of IAA-Asp diester and IAA-Glu diester

### IAA-Asp 4-methylester, IAA-Asp 1-methyl ester, IAAL-Asp diethyl ester (IAA-Asp-DE), and IAA-L-Asp dibutyl ester (IAA-Asp-DB),

IAA-Asp-DE and IAA-DB were synthesized according to the same methods as IAA-Asp-DM. Briefly, IAA was condensed with *L*-aspartic acid diethyl ester hydrochloride or *L*-asparatic acid dibutyl ester. *L*-asparatic acid dibutyl ester was synthesized from *L*-asparatic acid according to previous method<sup>14</sup>. IAA-Asp 4-methylester and 1-methyl ester were synthesized by coupling of IAA-benzotriazol with monomethyl aspartic acid according to the previous methods<sup>15</sup>.

**IAA-Asp 4-methyl ester** was obtained as a pale yellow solid (34 mg, 28%); <sup>1</sup>H-NMR (400 MHz, acetone-D<sub>6</sub>) δ 10.14 (s, 1H), 7.57 (d, J = 7.8 Hz, 1H), 7.39-7.36 (m, 2H), 7.28 (s, 1H), 7.10 (t, J = 7.6 Hz, 1H), 7.01 (t, J = 7.6 Hz, 1H), 4.82 (dd, J = 13.5, 5.7 Hz, 1H), 3.72 (d, J = 1.8 Hz, 2H), 3.50 (s, 3H), 2.84 (d, J = 6.0 Hz, 2H); <sup>13</sup>C-NMR (100 MHz, acetone-D<sub>6</sub>) δ 172.4, 172.1, 171.6, 137.6, 128.4, 124.9, 122.3, 119.7, 119.5, 112.2, 109.4, 51.9, 49.7, 36.6, 33.6; MALDI-TOFMS [M+Na]<sup>+</sup> *m/z* 327.092.

**IAA-Asp 1-methyl ester** obtained as a pale yellow solid (38 mg, 24%); <sup>1</sup>H-NMR (400 MHz, acetone-D<sub>6</sub>) δ 10.11 (s, 1H), 7.59 (d, J = 7.8 Hz, 1H), 7.40 (dd, J = 17.6, 8.0 Hz, 2H), 7.27 (d, J = 2.3 Hz, 1H), 7.10 (t, J = 7.6 Hz, 1H), 7.02 (t, J = 8.0 Hz, 1H), 4.86-4.82 (m, 1H), 3.71 (s, 2H), 3.60 (s, 3H), 2.83 (dd, J = 5.5, 1.4 Hz, 2H); <sup>13</sup>C-NMR (100 MHz, acetone-D<sub>6</sub>) δ 172.4, 172.1, 171.9, 137.6, 129.1, 128.4, 124.8, 122.3, 119.6, 119.5, 112.1, 109.5, 52.5, 49.7, 36.6, 33.5; MALDI-TOFMS [M+Na]<sup>+</sup> *m/z* 327.102.

***L*-Asparatic acid dibutyl ester**; <sup>1</sup>H-NMR (400 MHz, CDCl<sub>3</sub>) δ 4.58 (t, J = 5.3 Hz, 1H), 4.26-4.11 (m, 4H), 3.27 (ddd, J = 46.7, 17.9, 5.0 Hz, 2H), 1.62 (td, J = 14.5, 7.3 Hz, 4H), 1.41-1.32 (m, 4H), 0.92 (td, J

= 7.3, 2.3 Hz, 6H);  $^{13}\text{C-NMR}$  (100 MHz,  $\text{CDCl}_3$ )  $\delta$  170.2, 168.2, 66.8, 65.6, 49.7, 34.0, 30.5, 30.3, 19.1, 19.0, 13.7, 13.7; MALDI-TOFMS  $[\text{M}+\text{H}]^+$   $m/z$  246.175.

**IAA-Asp-DB** was obtained as a yellow solid (80 mg, 81%);  $^1\text{H-NMR}$  (400 MHz,  $\text{CDCl}_3$ )  $\delta$  8.25 (s, 1H), 7.55-7.51 (m, 1H), 7.41-7.32 (m, 1H), 7.21-7.08 (m, 2H), 6.62 (dd,  $J = 8.0$  Hz, 1H), 4.87-4.80 (m, 1H), 4.18-3.97 (m, 2H), 3.91-3.71 (m, 4H), 3.03-2.62 (m, 2H), 1.93-1.60 (m, 4H), 1.52-1.20 (m, 4H), 0.86 (t,  $J = 7.3$  Hz, 6H);  $^{13}\text{C-NMR}$  (100 MHz,  $\text{CDCl}_3$ )  $\delta$  171.2, 170.7, 170.7, 136.4, 127.1, 123.7, 122.5, 120.0, 118.7, 111.4, 108.7, 65.7, 64.9, 48.6, 36.4, 34.0, 33.4, 32.6, 30.4, 19.0, 13.7; MALDI-TOFMS  $[\text{M}+\text{H}]^+$   $m/z$  425.227.

**IAA-Asp-DE** was obtained as a colorless oil (150 mg, 85%);  $^1\text{H-NMR}$  (400 MHz,  $\text{CDCl}_3$ )  $\delta$  8.78 (s, 1H), 8.02 (s, 1H), 7.53 (d,  $J = 7.8$  Hz, 1H), 7.34 (d,  $J = 8.2$  Hz, 1H), 7.18 (t,  $J = 7.6$  Hz, 1H), 7.12-7.08 (m, 1H), 6.70 (d,  $J = 8.2$  Hz, 1H), 4.87-4.82 (m, 1H), 4.11 (qd,  $J = 7.1, 3.0$  Hz, 2H), 3.89 (qd,  $J = 7.2, 1.9$  Hz, 2H), 2.91-2.74 (m, 2H), 1.16 (t,  $J = 7.1$  Hz, 3H), 1.06 (t,  $J = 7.1$  Hz, 3H);  $^{13}\text{C-NMR}$  (100 MHz,  $\text{CDCl}_3$ )  $\delta$  171.4, 170.6, 170.6, 162.6, 136.5, 127.0, 123.9, 122.3, 119.7, 118.5, 111.5, 108.2, 61.8, 60.9, 48.6, 36.4, 33.4, 13.9, 13.9; MALDI-TOFMS  $[\text{M}+\text{H}]^+$   $m/z$  347.181.

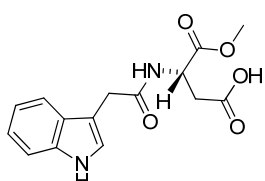

IAA-Asp 1-methyl ester

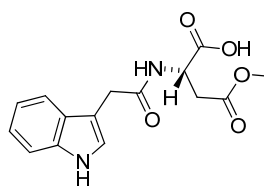

IAA-Asp 4-methyl ester

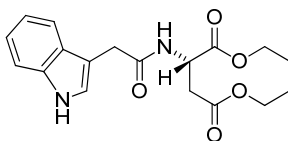

IAA-Asp diethyl ester

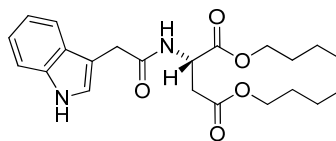

IAA-Asp dibutyl ester

**Supplementary table 1. Nucleotide sequences of oligo DNAs**

| <b>genotyping primers</b>                                 |                        |                              |
|-----------------------------------------------------------|------------------------|------------------------------|
| <b>Gene</b>                                               | <b>Primer name</b>     | <b>Sequence</b>              |
| iamt1 c-2_CRISPR                                          | <i>iamt1-LP</i>        | AGCTTCTTCCACCACTTGTCTC       |
|                                                           | <i>iamt1-RP</i>        | GCACTAGCACACTCAACACCTC       |
| ill2_SALK_087005C                                         | ILL2-LP                | AGGCCAATACAAATGTCTCTTAGGT    |
|                                                           | ILL2-RP                | ATTCAATGGAGTGTTAGGTTTGTGC    |
| ill1_SALK_046056C                                         | ILL1-LP                | AAATCCAAATCTTTTGACCACG       |
|                                                           | ILL1-RP                | GCTAATTCGAGGAAATTGATCG       |
| dao2-1_SALK_205223C                                       | AtDAO2-LP              | GCCTTGTTCCATTCTCCTATG        |
|                                                           | AtDAO2-RP              | TCCCAATAACAGTTTTGGATCC       |
| ill6_SALK_024894C                                         | ILL6-LP                | GAATGGGAACATATAAGCAAAGTTG    |
|                                                           | ILL6-RP                | CGTTTCTTGAGGTAGTAGAAGCTTG    |
| ill3_SALK_092410C                                         | ILL-3-LP               | CTCGACTTCTCTCTCTCTCTTTG      |
|                                                           | ILL3-RP                | GTTTGTGTCCCATGAAAGATTAC      |
| iar3_SALK_022636C                                         | IAR3-LP_A              | CACAAGGCAAGCGAGCGTGAA        |
|                                                           | IAR3-RP_A              | AGCAGACGCAACGGTAAGAGAGC      |
|                                                           | IAR3-LP_B              | GCGAGTGCTTACAGGTGGTT         |
|                                                           | IAR3-RP_B              | TTTACGGGAAATGTTTGTACGAC      |
| ugt84b1-c2_CRISPR                                         | UGT84B1-LP-A           | GTTGATCATTGTAACGGTCAAGTGT    |
|                                                           | UGT84B1-RP-A           | ACCAAAAACCCATTTACATACCTCA    |
|                                                           | UGT84B1-LP-B           | CAATCAAATAAAAAGGAACAAATGG    |
|                                                           | UGT84B1-RP-B           | TCCGCCATTAGATTATAGAAGTGAG    |
| dao1-1_SALK_093162                                        | AtDAO1-LP              | TTCCCCACGGAATTAAGGTAC        |
|                                                           | AtDAO1-RP              | CTATGGGGAAAAAGGTTCTCG        |
| dao1 dao2_CRISPR                                          | DAO1CRP5-GT1           | AATCGAAATTTGGCGCGTGG         |
|                                                           | DAO2CRP6-GT2           | GTCCTCCGTCCTGATAGGC          |
|                                                           | DAO1-KO-LP             | CGATAAAAATCTAGAGGCAAGATTCC   |
|                                                           | DAO1-KO-RP             | CTTCCGTTGCTCCATATCGTAGC      |
| ilr1_SAIL_631_F01                                         | ILR1-LP                | CACTCGCTCGCGGGATGCTT         |
|                                                           | ILR1-RP                | TCCGCTGATTCAGCCAAGATTCTG     |
| <b>Primers for vector construction</b>                    |                        |                              |
| <b>Constructs and amplified fragments</b>                 | <b>Primer name</b>     | <b>sequence</b>              |
| genome fragment (3934 bp) of <i>ILR1</i> from genomic DNA | ILR1-genome-promoer-5' | GAGTCGGGTTTGGACTTGAGACTATTGG |
|                                                           | ILR1 genome-UTR-3'     | TTCCCAACCCGAAACCTAACCTCAC    |



| for PCR template                                                       |                                |                                                   |
|------------------------------------------------------------------------|--------------------------------|---------------------------------------------------|
| <i>pDONR-proILR1::genome ILR1</i>                                      | ILR1-pro-5' attB1              | AAAAAGCAGGCTTCGGACTCCTTATTCTGAATATGG              |
|                                                                        | ILR1-3'-attB2                  | AGAAAGCTGGGTGTAATTCACCTCTTAACCTCTTCT              |
| <i>pDONR-genome ILR1</i>                                               | ILR1-gORF-5'-attB1             | AAAAAGCAGGCTTCATGGATTTCTCAGGGAGCTTCT              |
|                                                                        | ILR1-3'-attB2                  | AGAAAGCTGGGTGTAATTCACCTCTTAACCTCTTCT              |
| genome fragment (4992 bp) of <i>IAR3</i> from genomic DNA PCR template | IAR3-genome-promoer-5'         | CGATTCTCAACAGATTGGCAGACAATAGTGAA                  |
|                                                                        | IAR3 genome-UTR-3'             | TCTTTACGGGAAATGTTTGTACGACAACAAC                   |
| <i>pDONR-proIAR3::genome IAR3</i>                                      | IAR3-pro-5' attB1              | AAAAAGCAGGCTTC<br>GGCTCTAGACTCTCTGCTCTTTCTGTTAAGC |
|                                                                        | IAR3-3'-attB2                  | AGAAAGCTGGGTGAAGTTCATCTTTTTTGTACTCTTATTTAG        |
| <i>pDONR-genome IAR3</i>                                               | IAR3-gORF-5'-attB1             | AAAAAGCAGGCTTCATGAGTTTCTTCAAATGGGTTTC             |
|                                                                        | IAR3-3'-attB2                  | AGAAAGCTGGGTGAAGTTCATCTTTTTTGTACTCTTATT           |
| genome fragment (3830 bp) of <i>ILL2</i> from genomic DNA PCR template | ILL2-genome-promoer-5'         | GGTCTATGGTTCAGAAATTTGGATTAAGGATTAG                |
|                                                                        | ILL2 genome-UTR-3'             | CTGAACCAATAACCGATGAACAACCTGTC                     |
| <i>pDONR-proILL2::genome ILL2</i>                                      | ILL2-pro-5' attB1              | AAAAAGCAGGCTTCCTCTCCTGGTCTATGCTTAATTTG            |
|                                                                        | ILL2-3'-attB2                  | AGAAAGCTGGGTGCAACCTGTCTACAACCAAGGTGTAGA           |
| <i>pDONR-genome ILL2</i>                                               | ILL2-gORF-5'-attB1             | AAAAAGCAGGCTTCATGGCTCTAAACAAGCTCCTCAGTTTG         |
|                                                                        | ILL2-3'-attB2                  | AGAAAGCTGGGTGCAACCTGTCTACAACCAAGGTGTAGA           |
| <i>pDONR-AtDAO1_cDNA_ORF</i>                                           | AtDAO1_attB1                   | AAAAAGCAGGCTTCATGGGGAACTAAACGGAG                  |
|                                                                        | AtDAO1-attB2                   | AGAAAGCTGGGTGTCATTTATCTAGTCCTGCATG                |
| <i>pDONR-AtDAO2_cDNA_ORF</i>                                           | AtDAO2-attB1                   | AAAAAGCAGGCTTCATGGCGGAAGTAAATGGAGTC               |
|                                                                        | AtDAO2-attB2                   | AGAAAGCTGGGTGTTAATCTATCTTTGGGACGTC                |
| <i>pDONR-OsDAO_ORF</i>                                                 | OsDAO-attB1                    | AAAAAGCAGGCTTCATGGTCGAGATTCTGCG                   |
|                                                                        | OsDAO-attB2                    | AGAAAGCTGGGTGTTAGGCAGCTAAACGCGCAAG                |
| <i>pDONR-BdDAO_ORF</i>                                                 | BdDAO-attB1                    | AAAAAGCAGGCTTCATGGTCGAAATCCCGTCATTGA              |
|                                                                        | BdDAO-attB2                    | AGAAAGCTGGGTGTGCCGCCATTTCGCGCCAATGC               |
| <i>pDONR-AtGH3-17_cDNA_ORF</i>                                         | GH3-17-attB1                   | AAAAAGCAGGCTTC ATGATACCAAGTTACGACCCAAA            |
|                                                                        | GH3-17-attB2                   | AGAAAGCTGGGTGTTAAGAATCTAAACCAAGTGGTTCC            |
| attB adapter primers                                                   | Adapter primer for attB1       | GGGGACAAGTTTGTACAAAAAAGCAGGCT                     |
|                                                                        | Adapter primer for attB2       | GGGGACCACTTTGTACAAGAAAGCTGGGT                     |
| The expression vector for recombinant Enzymes                          |                                |                                                   |
| <i>pCold I_OsDAO</i>                                                   | <i>pCold_OsDAOs_Kpn-5'</i>     | GGCATATGGAGCTCGGTACCATGGTGGAAATCCCCGCC            |
|                                                                        | <i>pCold_OsDAOs_HindIII-3'</i> | GCAGGTCGACAAGCTTTTACGCGGCAAGACGTGC                |
| <i>pCold_DAO1</i>                                                      | <i>pCold_DAO1_BamHI-5'</i>     | TACCCTCGAGGGATCATAACATGGGGGAACCTAAACG             |

|                                                                     |                    |                                            |
|---------------------------------------------------------------------|--------------------|--------------------------------------------|
|                                                                     | pCold_DAO1_Hind-3' | GCAGGTCGACAAGCTTCATTTATCTAGTCCTGCATG       |
| <i>pEU1-GST_ILR1 for<br/>wheat cell-free<br/>protein expression</i> | pEU1-ILR1_BamHI-5' | GATATCTCGAGGATCCTGGGAGCTACGATTCTGG         |
|                                                                     | pEU1-ILR1_Kpn I-3' | ACTAGTGC GGCCGCGGTACCCTATAATTCACTCTTAACCTC |

Red colored sequence shows the attB1 and attB2 adapter sequence for adaptor PCR (2 rounds of PCR with shorter oligos) using attB adapter primers.

**Supplementary table 2 Parameters for LC-ESI-MS/MS analysis.**

For analysis of oxIAA-amino acid conjugates

| HPLC gradient program | Time (min) | flow(ml/min) | Solvent Ratio B(%) | mobile phase                      |                       | column temp(°C) |
|-----------------------|------------|--------------|--------------------|-----------------------------------|-----------------------|-----------------|
|                       |            |              |                    | A                                 | B                     |                 |
|                       | 0          | 0.2          | 3                  | water containing 0.1% formic acid | MeCN,0.1% formic acid | 30              |
|                       | 2          | 0.2          | 8                  |                                   |                       |                 |
|                       | 9          | 0.2          | 11                 |                                   |                       |                 |
|                       | 15         | 0.2          | 15                 |                                   |                       |                 |
|                       | 15.1       | 0.2          | 98                 |                                   |                       |                 |
|                       | 20         | 0.2          | 98                 |                                   |                       |                 |
|                       | 20.1       | 0.2          | 3                  |                                   |                       |                 |
|                       | 25         | 0.2          | 3                  |                                   |                       |                 |

|                                        | Retention time (min) |
|----------------------------------------|----------------------|
| oxIAA-Asp<br>D <sub>2</sub> -oxIAA-Asp | 5.9, 6.5             |
| oxIAA-Glu<br>D <sub>2</sub> -oxIAA-Glu | 6.9, 7.4             |

|                                        | ESI | transitions for quantifications (m/z) | Collision energy (V) | Fragmentor (V) | Cell Accelerator voltage (V) | Dwell time (msec) | Capillary (V) | source gas (°C) | gas flow (l/min) | Nebulizer (psi) |
|----------------------------------------|-----|---------------------------------------|----------------------|----------------|------------------------------|-------------------|---------------|-----------------|------------------|-----------------|
| oxIAA-Asp<br>D <sub>2</sub> -oxIAA-Asp | +   | 307.08/147.1<br>309.08/149.1          | 30                   | 104            | 7                            | 125               | 4000          | 300             | 10               | 30              |
| oxIAA-Glu<br>D <sub>2</sub> -oxIAA-Glu | +   | 321.09/147.1<br>323.09/149.1          | 24                   | 104            | 7                            | 125               | 4000          | 300             | 10               | 30              |

For analysis of IAA-amino acid conjugates

| HPLC gradient program | Time (min) | flow(ml/min) | Solvent Ratio B(%) | mobile phase                      |                       | column temp(°C) |
|-----------------------|------------|--------------|--------------------|-----------------------------------|-----------------------|-----------------|
|                       |            |              |                    | A                                 | B                     |                 |
|                       | 0          | 0.2          | 3                  | water containing 0.1% formic acid | MeCN,0.1% formic acid | 30              |
|                       | 2          | 0.2          | 8                  |                                   |                       |                 |
|                       | 9          | 0.2          | 11                 |                                   |                       |                 |
|                       | 15         | 0.2          | 15                 |                                   |                       |                 |
|                       | 15.1       | 0.2          | 98                 |                                   |                       |                 |
|                       | 20         | 0.2          | 98                 |                                   |                       |                 |
|                       | 20.1       | 0.2          | 3                  |                                   |                       |                 |
|                       | 25         | 0.2          | 3                  |                                   |                       |                 |

|                                    | Retention time (min) |
|------------------------------------|----------------------|
| IAA-Ala<br>D <sub>2</sub> -IAA-Ala | 16.7                 |
| IAA-Leu<br>D <sub>2</sub> -IAA-Leu | 18.4                 |

|                                    | ESI | transitions for quantifications (m/z) | Collision energy (V) | Fragmentor (V) | Cell Accelerator voltage (V) | Dwell time (msec) | Capillary (V) | source gas (°C) | gas flow (l/min) | Nebulizer (psi) |
|------------------------------------|-----|---------------------------------------|----------------------|----------------|------------------------------|-------------------|---------------|-----------------|------------------|-----------------|
| IAA-Ala<br>D <sub>2</sub> -IAA-Ala | +   | 247.1/130.1<br>249.1/132.1            | 22                   | 85             | 7                            | 250               | 4000          | 300             | 10               | 30              |
| IAA-Leu<br>D <sub>2</sub> -IAA-Leu | +   | 289.16/130.1<br>291.16/132.1          | 26                   | 104            | 7                            | 250               | 4000          | 300             | 10               | 30              |

For analysis of DioxIAA

| HPLC gradient program for DioxIAA, IAA and oxIAA | Time (min) | flow(ml/min) | Solvent Ratio B(%) | mobile phase                       |                        | column temp(°C) |
|--------------------------------------------------|------------|--------------|--------------------|------------------------------------|------------------------|-----------------|
|                                                  |            |              |                    | A                                  | B                      |                 |
|                                                  | 0          | 0.2          | 3                  |                                    |                        |                 |
|                                                  | 3          | 0.2          | 3                  |                                    |                        |                 |
|                                                  | 5          | 0.2          | 15                 |                                    |                        |                 |
|                                                  | 15         | 0.2          | 15                 |                                    |                        |                 |
|                                                  | 16.1       | 0.2          | 98                 | water containing 0.01% acetic acid | MeCN,0.05% acetic acid | 40              |
|                                                  | 19         | 0.2          | 98                 |                                    |                        |                 |
|                                                  | 19.1       | 0.3          | 98                 |                                    |                        |                 |
|                                                  | 21         | 0.3          | 98                 |                                    |                        |                 |
|                                                  | 21.1       | 0.2          | 3                  |                                    |                        |                 |
|                                                  | 26         | 0.2          | 3                  |                                    |                        |                 |

|                         | Retention time (min) |
|-------------------------|----------------------|
| DioxIAA                 | 2.9                  |
| D <sub>2</sub> -DioxIAA |                      |

|                         | ESI | transitions for quantifications (m/z) | Collision energy (V) | Fragmentor (V) | Cell Accelerator voltage (V) | Dwell time (msec) | Capillary (V) | source gas (°C) | gas flow (l/min) | Nebulizer (psi) |
|-------------------------|-----|---------------------------------------|----------------------|----------------|------------------------------|-------------------|---------------|-----------------|------------------|-----------------|
| DioxIAA                 | +   | 208.05/146.0                          | 6                    | 52             | 7                            | 250               | 4000          | 300             | 9                | 30              |
| D <sub>2</sub> -DioxIAA |     | 210.06/148.0                          |                      |                |                              |                   |               |                 |                  |                 |

## Supplementary text

### Synthetic DNA sequence of OsDAO and Bd DAO.

#### OsDAO [LOC4336150, Os04g0475600] codon optimized for *Escherichia coli* expression

ATGGTGGAAATCCCCGCCATTGATCTGCGCTTAGCTGGAGGTGGTGGCGGTGCAGAGGAAACCGCTCGTCTGCGTG  
ACGCATGTGCACGTCTGGGTTGCTTCCGCGTTTCAGGCCATGGTGTGCCACCGGGGTTGCAAGCTGAGATGAAAGC  
TGCGGTTTCGTGCCCTGTTGATCTGCCGATGATGCTAAACGCGCAATGCGGACATCATCCCGGTAGTGGCTAT  
GTACCGCCAGGGACAGCGAATCCCCTGTATGAGGCGTTTGGTCTGTGTGATGCGGCAGCTCCGGCCGATGTAGACG  
CCTTTTGTGCCCGGCTCGACGCGCCACCTCATGTGCGTGAAACGGTCAAAGCGTATGCGGAACGCATGCACTCTCT  
GATTGTGGACGTCCCGGGAAAGTTGCCGCGAGTCTGGGTTTGCATGGAGCGTCTTTTCAGGATTGGCCCTGCCAG  
TTCCGTATGAACCGCTATAACTACACCCAGGATTCGGTCCGGCTCTCCGGGCGTTCAGGTGCACACCGATAGCGGAT  
TTCTCACCGTTCTGCAGGAGGATGAATGCGTGGGCGGGCTTGAAGTGTGGACCCTGCAGCCGGCGAATTTGTGCC  
GGTAGATCCGCTTCCGGGCGAGCTTCGTCTGTAACGTTAGGGGATGTTGGCCAAGCCTGGTCCAATGGCCGCCTCCAC  
AACGTGAAGCATCGCGTGCAATGCGTTGAGCAGTGCCACGCGTTAGCATTGCCATGTTCTGCTGGCGCCGAAAG  
ACGACACTGTCTCGGCGCCGGGTGAACTGGTGCATGGCGAACATCTCGTCTGTTACCGCGAGTTCAAGTACGACG  
ATTATCGCCGCTTACGCTTGAGCACGGGTGAACGCGCGGGCGAAGCATTAGCACGTCTTGCCGCGTAA

#### OsDAO [LOC4336150, Os04g0475600] codon optimized for *Arabidopsis thaliana* expression

ATGGTCGAGATTCCTGCGATCGACCTTAGATTGGCAGGAGGTGGAGGAGGAGCAGAAGAAACCGCTAGACTCAGA  
GATGCTTGCGCCAGATTAGGGTGTCTTAGGGTTTCAGGGCATGGAGTCCCTCCAGGACTTCAAGCTGAGATGAAGG  
CTGCAGTCAGAGCCCTGTTTCGATTTGCCAGATGATGCGAAAAGACGGAATGCAGACATCATTCCGGGTTCTGGATA  
CGTTCCTCCTGGTACTGCTAATCCGCTCTATGAGGCGTTTGGGCTGTGTGATGCAGCCGCTCCAGCTGACGTTGATG  
CCTTTTGCGCGAGATTGGATGCACCACCGCATGTGCGAGAAACTGTGAAGGCATATGCTGAACGTATGCATTCGTT  
GATAGTGGACGTTGCTGGAAAAGTCGCTGCTAGTTTAGGACTTCATGGCGCTAGTTTCCAGGATTGGCCATGTGAG  
TTCAGGATGAATCGTTACAACACTACACGCAGGATTCAGTTGGTTCTCCTGGTGTCCAAGTGCATACAGATAGCGGTT  
TTCTAACTGTGTTGCAAGAGGACGAGTGTGTTGGTGGATTGGAGGTTCTAGATCCAGCAGCTGGAGAGTTTGTGCC  
TGTAGATCCGCTTCCCGGTAGCTTCGTGGTTAACGTAGGCGATGTTGGGCAAGCTTGGTCCAATGGTCGACTACAC  
AACGTCAAGCACAGGGTTCAAGTGTGTTGAGCGGTACCCAGGGTTTCCATTGCTATGTTTCTTCTCGCCCTAAAG  
ACGATACCGTATCTGCTCCAGGTGAACTTGTGGATGGCGAACACCCTAGAAGATATCGGGAGTTCAAGTACGACG  
ATTATAGGCGACTGAGACTCTCTACAGGCGAACGTGCAGGGGAAGCACTTGCAGGTTTAGCTGCCTGA

#### 2-oxoglutarate-dependent dioxygenase BdDAO [*Brachypodium distachyon* XP\_003579963.1] codon optimized for *Arabidopsis thaliana* expression.

ATGGTCGAAATCCCGTCATTGATCTCCGATTAGCTGGTGTGCCCCCTGAAGAATCTGCTAGGCTGAGAGATGCAT  
GTGAAAGACTCGGTTGCTTCCGAGTATTTGGGCATGGTGTTCCTGCGGCACTTCAAGCTGACATGAAAGCAGCTCT  
AAGAGCGCTATTCGATCTGCCAGATGATGCAAAGAGGCGTAATACCGAGATCATAGCTGGATCTGGTTATGTGCC  
ACCAAGTGCTGCCAATCCCTTGTATGAGGCCTTCGATTGTGGGATGCTGCAGTTCCTGCAGATGTTGACGCGTTTT  
GCGCTCGTCTAGATGCCCTCCACACGCTAGAGAAGCTGTGAAGAGCTATGCTGAGAAGATGCATGAGTTGATCGT  
GGATGTAGCTGGAAAAGTTGCCGTTCTCTTGGCCTTGAAGGTCATCCTTTCCAAGACTGGCCTTGCCAATTCGGA  
TGAATCGTTACAACACTACCGGAGGACACTGTTGGAAGCTCAGGAGTTCAGATCCATACAGACTCAGGCTTCTCAC  
CGTTTTACAGGAGGATGACTGTGTTGGTGGCTTGGAAAGTGCTGGACCCTGCAGCTGGAGAATTCGTGCCGTTGAT  
CCGTTTCCAGGGTCTTTTCTCGTCAACATTGGAGATGTTGGTACTGCATGGTTCGAATGGGAGATTACACTCCGTAA  
AACACAGAGTCCAGTGTGTCGCCGCTGTACCAAGGATTTCCATAGCCATGTTTCTTCTTGCACCGAAGGATGATAG  
AGTGTGTACACCTGAGGCTTTTGTGGATGCTGATCATCCGCGTAGGTATAGAGCGTTCAACTACGACGAGTACAGA  
AACTTCGGTTGAGTACTGGAGAGAGAGCTGGTGAAGCATTGGCGCGAATGGCGGCA

## References and Notes

1. Curtis, M.D. & Grossniklaus, U. A gateway cloning vector set for high-throughput functional analysis of genes in planta. *Plant Physiol* **133**, 462-469 (2003).
2. Nakagawa, T. *et al.* Development of series of gateway binary vectors, pGWBs, for realizing efficient construction of fusion genes for plant transformation. *J Biosci Bioeng* **104**, 34-41 (2007).
3. Narusaka, M., Shiraishi, T., Iwabuchi, M. & Narusaka, Y. The floral inoculating protocol : a simplified *Arabidopsis thaliana* transformation method modified from floral dipping. *Plant biotechnology* **27**, 349-351 (2010).
4. Trott, O. & Olson, A.J. AutoDock Vina: improving the speed and accuracy of docking with a new scoring function, efficient optimization, and multithreading. *J Comput Chem* **31**, 455-461 (2010).
5. Guenin, E., Monteil, M., Bouchemal, N., Prange, T. & Lecouvey, M. Syntheses of phosphonic esters of alendronate, pamidronate and neridronate. *European Journal of Organic Chemistry* **2007**, 3380-3391 (2007).
6. Chen, Q., Westfall, C.S., Hicks, L.M., Wang, S. & Jez, J.M. Kinetic basis for the conjugation of auxin by a GH3 family indole-acetic acid-amido synthetase. *J Biol Chem* **285**, 29780-29786 (2010).
7. Morrison, J.F. Kinetics of the reversible inhibition of enzyme-catalysed reactions by tight-binding inhibitors. *Biochim Biophys Acta* **185**, 269-286 (1969).
8. Cha, S. Tight-binding inhibitors-I. Kinetic behavior. *Biochem Pharmacol* **24**, 2177-2185 (1975).
9. Revelou, P.-K. & Constantinou-Kokotou, V. Preparation of synthetic auxin-amino acid conjugates. *Synthetic Communications* **49**, 1708-1712 (2019).
10. Mashiguchi, K. *et al.* The main auxin biosynthesis pathway in *Arabidopsis*. *Proc Natl Acad Sci U S A* **108**, 18512-18517 (2011).
11. Tanaka, K. *et al.* UGT74D1 catalyzes the glucosylation of 2-oxindole-3-acetic acid in the auxin metabolic pathway in *Arabidopsis*. *Plant & cell physiology* **55**, 218-228 (2014).
12. Aoi, Y. *et al.* UDP-glucosyltransferase UGT84B1 regulates the levels of indole-3-acetic acid and phenylacetic acid in *Arabidopsis*. *Biochemical and biophysical research communications* **532**, 244-250 (2020).
13. Kai, K., Nakamura, S., Wakasa, K. & Miyagawa, H. Facile preparation of deuterium-labeled standards of indole-3-acetic acid (IAA) and its metabolites to quantitatively analyze the disposition of exogenous IAA in *Arabidopsis thaliana*. *Biosci Biotechnol Biochem* **71**, 1946-1954 (2007).
14. Maiti, M., Rozenski, J., De Jonghe, S. & Herdewijn, P. Aspartic acid based nucleoside phosphoramidate prodrugs as potent inhibitors of hepatitis C virus replication. *Org Biomol Chem* **13**, 5158-5174 (2015).
15. Katritzky, A.R., Khelashvili, L. & Munawar, M.A. Syntheses of IAA- and IPA-amino acid conjugates. *J Org Chem* **73**, 9171-9173 (2008).
